# Supplementary material for: Deciphering the virome of Chunkung (Cnidium officinale) showing dwarfism-like symptoms via a high-throughput sequencing analysis
Source: Virol J. 2024 Apr 15;21:86. doi: 10.1186/s12985-024-02361-7 (PMC11017662; doi:10.1186/s12985-024-02361-7)
Supplement: Supplementary file 1 — Additional file 1: Supplementary Table 1. List of BLAST annotation results for the identification of plant-associated viruses. Supplementary Table 2. Summary of the raw and trimmed data for individual libraries sequenced on the HiSeq 4000 platform. Supplementary Table 3. Summary sequencing data, overall mapping ratios, and annotation results for each library. Supplementary Table 4. Statistical summary of the trinity de novo transcriptome assembly. Raw sequences read in each library. Supplementary Table 5. List of identified plant viral annotations of each library. Supplementary Table 6. List of genera identified in each library. Supplementary Table 7. List of identified families in each library. [file 12985_2024_2361_MOESM1_ESM.xlsx]

## Sheet: Table-S1
	Table S1: The list of BLAST annotation results for the Identification of Plant associated viruses
No.	Query_ID	Query_Length	Cnidium_Read_Count	Cnidium_FPKM	Order	Family	Genome_type	Genus	Virus_Description	Virus-Acronym	Sample_Location	Target_Length	Target_Start	Target_End	Target_Coverage	Bit	e-value	Identity %	Query coverage (%)	Contig_Sequence	GenBank _ID
1	c144610_g4_i2	456	76	1.41	Geplafuvirales	Geminiviridae	circular ssDNA	Begomovirus	[African cassava mosaic virus]	ACMV	Asymptomatic plant	134	1	70	52.24	81.6	4e-15	50	73	GGCAATTTCACGGTTGCTTTGATATGAATCGGAGCGGCGGCGAGAGCTTCACGGCGGTGA CTGAGATTTGCCTCTTTGAATCAATGGATGAACGAACCAGGGAAGAATTGTATGTCTCTC AGTGCGATAGTGGAATATACTTTTGGGATATTTCAAACCCTCTATATTTCACAGTTGTGA TGCATCTACACCGACAATTTAACATGAATCTAGATATTATAGAAATCCAGGTTCATTTCA ACAGCAAACTCCAGAGATCTCTAAGAATACAGAAATGTTGGATAAAATTTCAAAATTTGG ATGACTTTGACACCATCGTCGGAGGGTTTTAAATCTAGATTTAAGTTTCATGTAATGGAT TATCTAGATAATCTGGGTGTTATTTCAATTAAC…	AIP89891.1
2	c86210_g1_i1	219	1	0.37	Geplafuvirales	Geminiviridae	circular ssDNA	Begomovirus	[Ageratum yellow vein virus]	AYVV	Dwarfed plant	134	1	59	44.03	73.2	6e-13	54.24	80	GACCCCGGATTTGGGGCTGTTACATCAAGCCTCTTTGAATCATTGGATGAACGAACCGGG GAAGAATTGTATGTCTCTCAGTGCGATAGTGGAATATACTTTTGGGATATTTCAAACCCT CTATATTTCACAGTTGTGATGCATCTACACCGACAATTTAACATGAATCTAGATATTATA GAAATCCAGGTTCATTTCAACAGCAAACTCCAGAGATCT	BAU21357.1
3	c33935_g1_i1	218	3	1.12	Mononegavirales	Rhabdoviridae	ssRNA (-)	Cytorhabdovirus	[Alfalfa dwarf virus]	ADV	Dwarfed plant	2085	1481	1552	3.45	91.7	2e-18	51.39	99	GGAGTTTGGCCACCAGTCGTCGGCAAGATATACAGGATGACGTTTTACGGACCTCGTTGT ACAGGAATTTCTTGATAACGAACAAACTGTTCTTTTCGTCCTCAGCAATAATTGCCACTC TATCTGATGTCGCCCATTTCTGACGCAACGCCAGACTTATGACAGACGTCCTCACTGAGG AACAGCACGAATCCACAGTTACAGGGTTTGTAGACGGC	YP_009177021.1
4	c142285_g1_i1	8323	17903	30.5	Ortervirales	Caulimoviridae	circular dsDNA,RT	Caulimovirus	[Angelica bushy stunt virus]	AnBSV	Dwarfed plant	703	1	703	100	1310.4	0	90.34	25	TATCTGGATTTCCTTCGATTTCTTGAATCATAAATAAAGAAATTTCTTTGATTAGAAATT TTTTATTAATTGCTATTGAAATTAATCTTGTTGTTGGGTGTAAACCAATATTCTTAAAAC CTTCGGAACTTACAGCGTTCTGTAGTTTTCTTGAAGATGCTGGTTCCTTCTTGTACCTGT TAAGATAATAACAAATATTTTCTAATTATACTGTATACCTTTCTTTTTTCTGCTTCCAAA ACATGCCTCACCGTGCTCAACACCTATGCTTTCCCTTTTCCCCACCTGGTACTTCGACGG TACTAACCAAGACGGTGTTATTCAGAGCAATTGGATCCGTACACAAACTAGGAAGAGACT AAAAGATAGACCGAACAAGTATAATAAGAAGAA…	YP_009666503.1
5	c144085_g1_i1	4445	1797	30.1	Ortervirales	Caulimoviridae	circular dsDNA,RT	Caulimovirus	[Angelica bushy stunt virus]	AnBSV	Dwarfed plant	703	158	492	47.65	466.5	5e-130	76.01	30	CCCGTAAATCGTGATTTATATATCACGATTTTTATTTTAAAAATTTGCATTTATAAATTA GTTAATGATTTGTAAAATGCATATCAAATTGGAAAAATTAGATTTAATTCTAATTCTTTT TCTGTAAAATTCTAAAAATATTCTAGTATTTAATTATTATGGAAAATCTTTAGGAACCAT CCCCGACTTGGTATCAGAGCCTTGTTTTAATCTTTTAAAATGAATCTTTTAAAAGAAAAA GATCAGATTCCTGAGGAGGAAACTTCTGATAATTTGGAAATTGAATTTCTAGAAAATGAA AAAGGTTTTGAAGCAAGCTTTTTAATTAAGCACGAACTTCTTCCAAAAATCAGAAATTCT AAACTTAATTTAAAGAAAGAAACAATCTTTAAA…	YP_009666503.1
6	c140465_g2_i2	3399	460	1.99	Ortervirales	Caulimoviridae	circular dsDNA,RT	Caulimovirus	[Angelica bushy stunt virus]	AnBSV	Dwarfed plant	696	493	691	28.59	292.4	1e-77	73.6	17	TTGAAGACAAGAAGCAGTTGCAAAGGTTTTTCGGTATATTAACTTATGCATCTGATTATA TTGCAAAACTTGCAGCTATTCGTGCACCTTTGTAGGATAAGCTCAAGAAGGATATTCCAT GTGAATGGAAAGATTCAGACACCAGTTATATCAGCAAGGTGAAAAAAAATCTAAAGAGTT TTCCAAAACTCTATCATCCAGACTCGGATGACAAGCTTATCATTGAGACAGATGCTTCAG GAGAATACCTGGGTGGAGTACTCAAAGCAGTTAATTCAGAAAAAGAATTAATTTGCAGAT ACGCTTCGGGTAGCTTTAAAGATGCTGAGAAAAATTACCACTCTAACGAGAAGGAATATC TTGCAGTAATTAGAGTTATCAATAAATTTTCTA…	YP_009666503.1
7	c139044_g2_i2	1744	682	2.06	Ortervirales	Caulimoviridae	circular dsDNA,RT	Caulimovirus	[Angelica bushy stunt virus]	AnBSV	Dwarfed plant	703	537	699	23.19	249.6	4e-65	73.01	27	CAAGAAGGATATTCCATGGGAATGGAAAGATTCAGACACCAGTTATATCAGCAAGGTGAA AAAAAATCTAAAGAGTTTTCCAAAACTCTATCATCCAGACTCGGATGACAAGCTTATCAT TGAGACAGATGCTTCAGGAGAATACCTGGGTGGAGTACTCAAAGCAGTTAATTCAGAAAA AGAATTAATTTGCAGATACGCTTCGGGTAGCTTTAAAGATGCTGAGAAAAATTACCACTC TAACGAGAAGGAATATCTTGCAGTAATTAGAGTTATCAATAAATTTTCTATTTATCTAAC CCCTGTTAAATTCTTGGTTAGAACTGATAATAGAAACTTTACTTATTTTCTTCGTATTAA GTTACAGGGAGATAATAAGTAAGGAAAACTTGT…	YP_009666503.1
8	c143501_g3_i1	1409	610	2.36	Ortervirales	Caulimoviridae	circular dsDNA,RT	Caulimovirus	[Angelica bushy stunt virus]	AnBSV	Asymptomatic plant	514	262	488	44.16	188	1e-46	41.81	48	TGTATACCTGGAAAGCTTTCCATCCGCAAAAGTTCTTTAAAACAAATAAGTCTTTTATTC TAGAAATATCTAGTCCTCTTCTGCACTTCTCTATCTTAATTCACCTGATCATTACCTCAG CTGTCGTTAGCTTCAATCCTTCAAAATTTTGAACTCCGACTATCCAAGGATACGTCTTTT CCTACTTTGATGACGAATTACTCCCTCCCTCCAGGATCTAGTTGACCAGACTATTTAGGA TTAAGATCCTGACACTGCGTAATGGGGAACTGCTTGATAGATAGGGTTACTGATAGACAG ATATATGGAATAAAGATTTTTATTTGAATAATAAGAACTTATACATGCTCTGGATGTATG CTTCCAGAGTATTTACACACTACTACATAGCTA…	YP_009666504.1
9	c143502_g4_i1	1121	308	2.6	Ortervirales	Caulimoviridae	circular dsDNA,RT	Caulimovirus	[Angelica bushy stunt virus]	AnBSV	Dwarfed plant	703	181	468	40.97	444.5	5e-124	74.74	77	ATTAAAGTAGATGCTTCTACTTTATTCCTCTACCACTGCTTTTCCAGAAGCTTTGTCTTC TTCTTTAGTGGTCGGGTCCTCCATTTTCTCTTCTGAGGTGCTGGTGGTTGGCTTGTTGTC ACAGATTAGACAAGATGCTTTGTCTTCTCTCTCTGTCTTCTTTAATATTCGTTTGATAGC TTTACATAAAGATGGAAAGTGACATCCGAATATTTCTCTTCCACTAACTAGTGTCTTGAC ACAGCTGTGCTTTTTTCTTGGATAAGATGATTCCAAGTAATTGACATTTCTTCAGAACTG CTGCTAGGTGTCTAAGATGATCCTGTTCGTTATCACTAAAGATAAGGATGTCATCTACAT AAACACAACAGAATTTTTCAAAAGACCTGAATG…	YP_009666503.1
10	c140591_g1_i2	1070	157	2.51	Ortervirales	Caulimoviridae	circular dsDNA,RT	Caulimovirus	[Angelica bushy stunt virus]	AnBSV	Dwarfed plant	528	153	240	16.67	80.9	1e-14	48.75	21	AACTTTTTCAAAGGCTGTGGGGACTCATAATGGGTGCCCATCCTGTGTTTTTAATAAAAT TATTAACAACACCTATAGATTTATGCTCCATTAACAAAAGAACTGTATTCTGATCGTTCT AAGCATCTTTGTTAGTTTGAATAATCAAACTAATTTCTTTAGCCCAATCGTCGATGAACT CTTTCCTGTCTGGCTTACAATCAATGTTTAGAATATTATTCCCAAAAACATTAGTTGTAT TTTTAGACTCGGAATTAAAAGGATAGAAACCACCTTACCTTTTTCTGCTTTCATCAGGTT TTTTACCTGATTGATCTTCAGTTTTTTTTTTGAAGTTTCTCCTGTTATCGGCAGTTTGTC CATTCTGAATGTCTCTGTAAAGATTTCTTCATC…	BCM78266.1
11	c143502_g2_i1	802	15	1.4	Ortervirales	Caulimoviridae	circular dsDNA,RT	Caulimovirus	[Angelica bushy stunt virus]	AnBSV	Dwarfed plant	514	262	488	44.16	171.4	6e-42	41.15	77	ATTAAAGTAGATGCTTCTACTTTATTCCTCTACCACTGCTTTTCCAGAAGCTTTGTCTTC TTCTTTAGTGGTCGGGTCCTCCATTTTCTCTTCTGAGGTGCTGGTGGTTGGCTTGTTGTC ACAGATTAGACATGATACCTTGTCTTTTCTTTATGTTTTTCTAAATATTCAATTGATTGC TTTACATAAAGATGGAAAGTGACATCCGAATATTTCTCTTCCACTAACTAGTGTCTTGAC ACAGCTGTTGAAGATTCTCTTATCTTCTGTACTCATTGGAATATGAGTCATAGAAGTCAT CAAGCATAGATTAGAGGCTAGGTTGATTTTTACCTTATCATCTTCCTTTATGCTGAGAAT TTTCTCCAAAATATTTTCATATTTATGCAGAGA…	YP_009666504.1
12	c144085_g3_i1	715	96	2.8	Ortervirales	Caulimoviridae	circular dsDNA,RT	Caulimovirus	[Angelica bushy stunt virus]	AnBSV	Dwarfed plant	328	15	243	69.82	417.9	3e-116	89.52	96	GAAAAACAAATAGAAACACCGACAGGTGAAGAAAGCATTTTCGAATCTCACGAAAATGAA TCTGGTTTCTCAGGAAACTTGTTAATTGAACAATCTCTTTTGAAAAAAGTATTAAAACAA CCTTTTAATATTGATTCACGAGAAGTGTTTAAACAACCAAATAAATTGATTGATTTCTTT AAACGGAAAAATCATATTTATTATCATGTGTCTACTAAAGAATTTCATGTAGATTCTTCA GAAACACACGGACGTGTTTATTTGCCTCTCATCACTAGAGAAGAAATAAATACATCATTG TCCAAGATTGACTCAAAGATCCGCAGTAAGATCAACATGATTCATTTTGGAGCAATAAAA ATTCTGTTAAAAGCAGAATTCGCGGCAGGTATT…	YP_009666499.1
13	c126434_g1_i1	701	116	1.09	Ortervirales	Caulimoviridae	circular dsDNA,RT	Caulimovirus	[Angelica bushy stunt virus]	AnBSV	Dwarfed plant	528	192	405	40.53	371.3	4e-102	83.33	87	CGAATAGACTTATGGTCTAAAGAAATGAGTCTAATCATTAGTACAAACCCTTCAGTTTAC GATAGTCAACAGAAGATTTTGTTGCTCATAGATCATAAGACCACAGGAACTGTTAATAAA TTTATTAAAGACACCTCTTGGACAAATAGGTCTAATGCGGAAGATGCCTTTAATGACATT ATTAACTTTCTATATCTAGAATTCTTAGGTATAGATTATGTTAGTGATAAGAGTGCTGAA AAAGATAGAGAAAAACAAAACTCTATTAATACTCTTCACAACATGCAGCTGTGTAATATA TGCGAACTTAAGCCCTTTTTCTGTGCTTATGAGAAACATATGATTAACACAGGAGAACAA CAGAATTATCCTATTTACATAGACATGTTCATT…	YP_009666502.1
14	c141697_g2_i1	700	113	3.16	Ortervirales	Caulimoviridae	circular dsDNA,RT	Caulimovirus	[Angelica bushy stunt virus]	AnBSV	Dwarfed plant	514	262	488	44.16	177.9	6e-44	40.09	98	GGTGGTTGGCTTGTTGTCACAGATTAGACAAGATGCTTTGTCTTCTCTCTCTGTCTTCTT TAATATTCGTTTGATAGCTTTACATAAAGATGGAAAGTGACATCCGAATATTTCTCTTCC ACTAACTAGTGTCTTGACACAGCTGTTGAAGATTCTCTTATCTTCTGTACTCATTGGAAT ATGAGTCATAGAAGTCATCAAGCATAGATTAGAGGCTAGGTTGATTTTTACCTTATCATC TTCCTTTATGCTGAGAATTTTCTCCAAAATATTTTCATATTTATGCAGAGATATTTTCTG AAGATCTTCTTTCTCTAGGGTAACCTCCATAGGCGTGCTAGGTTTGTAGATCTTTTCTTT AACAATTCCGAGTTGAACATAATGAAATGGCCT…	YP_009666504.1
15	c126147_g3_i1	535	60	1.7	Ortervirales	Caulimoviridae	circular dsDNA,RT	Caulimovirus	[Angelica bushy stunt virus]	AnBSV	Dwarfed plant	703	583	703	17.21	240.4	7e-63	92.56	67	GGATTATTGGGGTGGCATATTGAAAGCAGAGAATGCAGATGGCAAAGAGCTAATTTGCAG ATATGCTTCAGGAAGCTTTAAGGCAACAGAGACTCGATATCATTCTAATGAAAAAGAGTA TTTAGCTGTAATTAGAGTTATTAAGAAATTCACTATCTATCTAACCCCTGTACATTTTAC AGTTAGAACAGATAACAAGAATTTCACGCACTTCATGAATCTTCAGATTCAAGGAGACAA CAAACAGGGAAGACTCGTAAGGTGGCAGCAATGGCTATCTCACTATAGTTTCACTGTAGA ACATTTAGAAGGAAGCAAAAATGTTTTTGCAGATTTTCTAACCAGAGAATTCTATCCTTC AAAAGAAGCTTAAGATGGAACCCACTCCAAAGG…	YP_009666503.1
16	c155580_g1_i1	535	96	1.7	Ortervirales	Caulimoviridae	circular dsDNA,RT	Caulimovirus	[Angelica bushy stunt virus]	AnBSV	Dwarfed plant	117	2	117	99.15	174.9	4e-43	74.14	64	TCTCTAAAAATATCAAAGAAATAAAAGAAAAATTGATAGCTATCTTAGGAGCATAGTCCA TGACTGCTACAATTATCTCTGTTTCTAACGATATAGAAAAGATTGTTATTCCTCTTCTCA AAGAAATTTTAGAAAAGATCAACAATCAGCAACAGGATTCTATTAAGGAATTAATAGAAG CAGCATCGGCTAAAATCATCATGGAGATGAAAAAATGCCCTTGTAACGAAGAACTTCTAG CAGCTATTGGAAAGCAGCCAGAAGATAAAGGAAAACAGATTGTCAGCCAGACATCTGAGC AACCACCAAGAAGAATGTTATACAGTTTCCCAAATGATTCTGTAGGCTTCGAAGCACTTG GTACAGGAAAAAATAAGAATTCAATTGTATGGC…	YP_009666501.1
17	c140465_g4_i1	444	25	1.44	Ortervirales	Caulimoviridae	circular dsDNA,RT	Caulimovirus	[Angelica bushy stunt virus]	AnBSV	Dwarfed plant	703	554	699	20.77	225.7	2e-58	73.97	97	TGTTGAAATTCTCTTGTCAAAAAGTCTGTTAAACAGTTCTTGACTCCTTCAATGTGTTCT ACATCAAAGCTGTATCGACTTAACCATTGTTGCCAACGGACTAGTCTTCCTTGCTTATTA TCTCCCAGTAACTTAATACGAAGAAAATAAGTGAAGATTCTATTGTCAGTTCTAACCAAG AATTTAATCGGGGTTAAATAAATAGAAAATTTGTTGATAACTCTAATTACTGCAAGATAT TCCTTCTCGTTAGAGTGGTAATTCTTCTCAGCGTCTTTAAAGCTACCATAAGCATATATG CAAATTAATTCTTTTTTAGAATTAATTGCCTTGAGAACTCCTCCCCAGTATTCTCCTGAA GCATTTGTCTCAATGATAAGCTTGTCATCCGGT…	YP_009666503.1
18	c116343_g1_i1	436	51	1.02	Ortervirales	Caulimoviridae	circular dsDNA,RT	Caulimovirus	[Angelica bushy stunt virus]	AnBSV	Asymptomatic plant	703	230	374	20.63	280.4	5e-75	93.1	99	CTTAGTTTTTTCAATAAATCTAAGGAATGAAATCGAAAATTTGTTAGAAAAAGTCTGTTC AGATAATCCATTAGATCCTTCTAGGACGAAAAATTGGATGACTGCTAGCATTAAACTCAT TGACCCTAGGAAAGTATGCAAGGTTAAGCCTATGAAATACAGTCCTCAGGATAGAGAAGA GTTCGCTAAACAGATAAAGGAATTACTAGATATGAAAATCATCATTCCTAGTAAATCAGC TCACATGTCGCCAGCCTTCCTTGTTGAAAATGAAGCTGAAAAACGACGTGGTAAGAAACG AATGGTTGTCAACTATAAGAAGATGAATGATCTTACTATAGGTGATGGTCATAACCTCCC TAATAAAGATGAATTACTCACCCTTATTAGAGG…	YP_009666503.1
19	c126434_g2_i1	422	74	1.58	Ortervirales	Caulimoviridae	circular dsDNA,RT	Caulimovirus	[Angelica bushy stunt virus]	AnBSV	Asymptomatic plant	528	41	189	28.22	159.1	2e-38	100	99	GTAAATGCAAAATTCGAACAGGATAATGAATTAAAAGAAATGTTTGGATTCATTAACCCT GAAAACTGTCTTATTTTAAATGAAATTGACTCTTCAGTTAGTTCATTTAGTCAGGACGAA GACCTCATCGCAGACACTGAAGTATCAGACTTCGATGATGAAGAAAGAGAAATTGATCCA AATCAATTCAAGCAAGAATATTTTGGACCTCCAAAATATCAATATAGAACTTATATGGAA ACGCAGGTGCCTCCATATGAAGGAAAAGAAGGAGTAAAAAATCCAGAAGCATCAGGATCA GGCACAAAGAAGGCTAATCCATTGCGAGATTTCTACCCTCCAACAAATGAGTTTAAGGTA ACTAACTCACCATTTGGTAGTAATGTTCTTAAT…	BCM78266.1
20	c126147_g2_i1	416	34	0.75	Ortervirales	Caulimoviridae	circular dsDNA,RT	Caulimovirus	[Angelica bushy stunt virus]	AnBSV	Asymptomatic plant	514	29	160	25.68	204.1	5e-52	76.09	99	ATTGATCTTATTGCAGGAGATCGAGGCCAAGACTCAAGAGCTTAAGCTATTGAGGCTAAG AAGAGAATATCTCAAGTCTGTAAACCAGACTTCAGATCAACAAAGGGTTGTTCCTACTCC CTGCTTGGAAACAAGTAAAAACGTAGCTAGTCCAGTGACATCGTCCCTTGCGACCCTGTC TATTGGTAAAGACGGTTCAAACCCGTGTGCTGATAGTTTGCAAAAAACTATGATAGATGT TCAGACATCTAACAACGTTAGTAATGCTTCAGTGTTAACACTAAAGCCTAACGGGGGAAT TCAAATCCCAGAAAAGTCTATTGAGAAATCAGTAGCATGTCCAGTCGGAATTAAAAACTA CTATGTGGTTTTTAACGGCCCTTATCCAGGAAT…	YP_009666504.1
21	c17995_g1_i1	388	45	1.14	Ortervirales	Caulimoviridae	circular dsDNA,RT	Caulimovirus	[Angelica bushy stunt virus]	AnBSV	Asymptomatic plant	703	70	198	18.35	245	2e-64	88.37	99	TGCTATGTAGATACAGGTGCAAGCATTTGTTTGGCGAACAAATACGTGATTCCACCAGAG CATTGGGAAAATGCAGAAAGACCAATCAAGGTCAAAACGGCTAACGGAATAATTACCATT GACAAGGTATGTAAAAATCTTGACATGATAATTGCAGGAACCAGTTTCCACATTCCTACA GCTTATCAGCAAAATGCAGGTATGGATTTTATTATAGGCAATAATTTCTGCTTATTATAT AGTCCATGTATCTTTCATTTGAAGCAAATAGTTCTCCATACTTTAGAGAAAAAACCAGTT TGGGTTGATAAAGTATTTAGAGCAGAACAAAGAGGTCTGAAAGGTTTCTTAGACTCCCGT AAAATAGGATCTAAAAAACGAGCTCCAG	YP_009666503.1
22	c126147_g1_i1	388	15	0.38	Ortervirales	Caulimoviridae	circular dsDNA,RT	Caulimovirus	[Angelica bushy stunt virus]	AnBSV	Asymptomatic plant	514	178	294	22.76	191.4	3e-48	77.78	83	GGGACGCAGTGGTGTCCAACACAGGAAGTTCAAGGATTTGCAGAAGCAAAAGCAGCAGCT GCAATATTCACCAACTCAGAGCAAATAGCACCATTGGAGCTTATTCTTGATGACTCAAGG ATTAACCCCTATAAAATGGCGTTAGAGAAAGTTTCCAATCTCAAGGTTATTGGAAAGAAA GTCCCAGTGGCTAAACAGCAGGTTGAGTTCATCCTGGAAGAAGATACGGATTTCAACGTC AAGGTTGAAAACACGTATGAAGACTTTAGCTACATCTACAGCGTGGCTAGAAGAGCGACT CCGCAGCAGTTTGAGCAGGAGCATTTCTTTACAACTGATAAATCTAATCTCAGTTATATA AATGCTTTTCCATCTGTGCATCCAGAAC	YP_009666504.1
23	c144085_g4_i1	383	57	0.38	Ortervirales	Caulimoviridae	circular dsDNA,RT	Caulimovirus	[Angelica bushy stunt virus]	AnBSV	Dwarfed plant	328	241	327	26.52	164.1	5e-40	90.8	68	CTCAGAAATAGGATCTACTGTCCCTAAGCAATTTGTTAACATCAATAATGATAACGAAAA TTGGACAATAGACATTGCTAAGGAAAAACCTCGAATAGGAGACCTTAGACGATCAATGAG TGGCACGACTCTAAGAATAGGAGAACCCTCTTCTAGTATCGTAGCACCAAGAACCCATAG ACAGCAGTCTAATAGGTTTAATGAAACAGATTTAAAACGTCTGTCAGAAAAGGTAGATTA CTTAACAAACATATTAGAATCAGGATGAGTTCTAATCCTTTGTTACAGTATCCTCATATC TACAAAAAGGGTAAGATTTTGAATCTTAAGAGATTAGAAGAAGGTAGTAATAAGCCTAAA AGGGTTTATACCTTTGTATCTAG	YP_009666499.1
24	c87807_g1_i1	376	20	1.6	Ortervirales	Caulimoviridae	circular dsDNA,RT	Caulimovirus	[Angelica bushy stunt virus]	AnBSV	Dwarfed plant	514	146	225	15.56	145.2	2e-34	86.25	94	TTTAACGGCCCTTATCCAGGAATCTATACCTCTTGGAATATTGCTGAGAAAGCAGTAAAA GGACGCAGTGGCGTTCAACACAGGAAATTTAAAGATTTCGCAGAAGCAAAAGCAGCAGCG TCAATCTTTACAAATTCAGAACAAATAGCACCTTTGGAGTTAATTCTCGATGATACAAGA ATCAACCCCTACAAGATGGCTTTAGAAAAGGTTACTAATCTCAAAGTAATCGGCAAAAAA AGTCCCGGTGGCTAAACAACAGGTTGAATTCACCCTGGAAGAAGATATGGATTTCAACAT CAAGGTTGAAAATACATATGAAGATTTTAGTTATGTTTACAGCGTAGCTAGAAGAGCGAC CTCTCAACAGTTCGAG	YP_009666504.1
25	c139987_g7_i1	358	44	1.32	Ortervirales	Caulimoviridae	circular dsDNA,RT	Caulimovirus	[Angelica bushy stunt virus]	AnBSV	Asymptomatic plant	514	341	453	21.98	93.6	7e-19	41.24	79	GAGATTTTCATCAAAGTCCAATCTACACTTCCGTTCTGGGAAGAATACAACGATGAACTG GTCAAGCCATTTCATTATGTCCAGCTCGGGATAGTAAAAGAGAAAATCTACAGTCCAAGC TCATCAAGCCCAGTCACTCTGGAAAAAGTTGATCTTCAGCAGATTGCTCTTCATAAGTAT GCTAATATTTTAGAGAAAATATTCAGCATAAATTGAAGTGATAAGGTAAAGATTAATAAT ATCTCTGCTTTATGTTTCATGACTTCAAAGACTCATTTACCCATGAGTAAAGAAGATAAG GAATCTCTCAGCAGCTCTCTTGAAAGTCTAGTTTGCGGAAGAAAAATGTTTGGTTCTC	YP_009666504.1
26	c2203_g1_i1	348	36	1.15	Ortervirales	Caulimoviridae	circular dsDNA,RT	Caulimovirus	[Angelica bushy stunt virus]	AnBSV	Asymptomatic plant	514	370	484	22.37	182.2	2e-45	77.39	99	CAATATTGGAGCTGTTAAGGAAAGAATCTACACTCCTAGCAAGGAAATGGAAATAACCTT GCAGAAAGAAGATTTGAAGCAACTGGCAGAAGAAAAAGGTCTTGAAATAATTCGAAGACT ATTCTCCCTTCCAGACGAAGCAAAGATACACATTAATTTGTGTACCTATACGAATCTGAT CACTTCTTTTAGTCATAAAGGAATGACCCCAGAAGATAAAAAGAAGCTGGCTTTATTCAA AGAGAGAATAATTTCTCCTTTAGCATTTGGCCGACACAACGAATCTTTTTGTAATAAAAA GAAGAGGCTGTTAGCAACTTTCGGAGTGGCTTACAGCTGTAAGTTCTG	YP_009666504.1
27	c142213_g2_i2	329	2	0.22	Ortervirales	Caulimoviridae	circular dsDNA,RT	Caulimovirus	[Angelica bushy stunt virus]	AnBSV	Dwarfed plant	528	159	240	15.53	82	2e-15	52.44	73	ACTGGATCTAAGCCAGACGAAAAAGAAGGTAGCAAAAAAAGAAAAGGTAACTTTTATCCT ACTACAGAGTCTAAAAACACTAACAATGTTTTCGGAAATAATATTTTAAACATTGATGGT AAGACCAACAGAAAAGAGATCATAGACAATTGGGCTAAAGATATTAGTTTGATTATTCAA ACAAACACAGAAGCTTATGATGATCAAAATACATTTTTATTATTGATTGAGCATAAGACT GCAGGTATAATTAACAGCTTTGTTAAAAGTACCAATTGGGCACCAACGACGAGTCCCTTA ATTGCCCTTGAAAAGGTATTAGATGCTAT	CAB4096530.1
28	c149233_g1_i1	263	3	0.59	Ortervirales	Caulimoviridae	circular dsDNA,RT	Caulimovirus	[Angelica bushy stunt virus]	AnBSV	Dwarfed plant	528	275	361	16.48	153.3	6e-37	83.91	99	AGAGAAACAAAACTCTATTAATATCCTCCATAACATGCAACTGTGTAATATTTGTGAGCT ATAGCCCTTCTTTTGTGCTTTCGAAAAACACATGATCAACACAGGTGAACAATCGAATTA TCCTACATACATAGAAATGTTTATTAGGAAAATTTCAGTTATAGGAGAAAAGGCAATGCA AAGACATAAAGATCTGGTAACAAATACCACTAAGTTTAGTCTAGCGTTCGCCTACAACCT AGTTACTGAAGAAGTAACTAAGC	YP_009666502.1
29	c62547_g1_i1	263	15	1.01	Ortervirales	Caulimoviridae	circular dsDNA,RT	Caulimovirus	[Angelica bushy stunt virus]	AnBSV	Asymptomatic plant	514	287	373	16.93	155.2	1e-37	81.61	99	GCTTTTCCATCAGTTGATCCAGAACTCGTTTATGAGTCTTATAATTTTGGCTTATTAAAT GTGGTCTATCCATCGGAGTCCATGGGAGAAATTAAGTTGTTCCCGGAACAATTTAGAAAG GCAGTTCTTCAGTTCAGAAAGAAATGTCTGTCAAAAGATCAGTCAGTGTTCATAAAATTC CAGTCCACCATAGGATTTTGGGAAGGTGAAGGAGATATGGAAAATTATATCAGTCCATAT CACTACGTGAACATCGGAGCGGT	YP_009666504.1
30	c157114_g1_i1	258	3	0.63	Ortervirales	Caulimoviridae	circular dsDNA,RT	Caulimovirus	[Angelica bushy stunt virus]	AnBSV	Dwarfed plant	528	175	259	16.1	156.8	5e-38	92.94	98	AGAAATTCTAGATATAAGAAGTTAATAATATCATTGAAAGCATCTTCAGCGCTAGACCTA GTCTGCCAAGAAGTGTCTTTAACAAATTTATTAACTGTTCCTGTAGTCTTATGATCTATG AGTAGCAAAATCTTCTGTTGACTGTCGTAAACAGAGGGATTTGTACTAATGATAAGGCTC ATTTCCTTAGACCATAAGTCTATACGTAATCTACGATCTTTCATAGATTCACATTCTAAA TTTAGAACATTACTACCA	BCM78266.1
31	c89656_g1_i1	256	9	1.93	Ortervirales	Caulimoviridae	circular dsDNA,RT	Caulimovirus	[Angelica bushy stunt virus]	AnBSV	Dwarfed plant	703	502	586	12.09	164.5	2e-40	91.76	99	GATAGAAGACAAAAAGCAATTACAGAGGTTCTTAGGCATTTTAACCTATGCTTCTGATTA CATTCCAGGTTTAGCATCCAAGAGAGCACCTTTGCAGGTCAAACTCAAAAAAGATGTACC ATGGAACTGGATAGCTTCAGACACCTCGTACGTGGCAAAGCTAAAGAAATGATTAACTAA CTTTCCAAAGTTATACCATCCAGCGCCCGATGAAAAATTGATCATCGAGACTGATGCATC TCAAGATTATTGGGGT	YP_009666503.1
32	c29950_g1_i1	231	17	1.77	Ortervirales	Caulimoviridae	circular dsDNA,RT	Caulimovirus	[Angelica bushy stunt virus]	AnBSV	Asymptomatic plant	703	419	491	10.38	129	1e-29	84.93	94	GTATATGATTTTGAGCACAATGAGTTCCTTGATCAATTTCTAATCCTAAGAAATTAATCT TTGTCTTGAAAAGCTGAGCTTTCTTCTTTGATAGAATAATCCCGAGGGATTGACATTTCT TTAACACTGCTGCTAAGTGCCAAAGATGATCATGTTCGTTATCGCTGAAAATAAGAATAT CATCAACGTATACACAACATAATTTTTCAAAAGATCTAACATTGTGTTTGG	YP_009666503.1
33	c144085_g5_i1	228	12	1.78	Ortervirales	Caulimoviridae	circular dsDNA,RT	Caulimovirus	[Angelica bushy stunt virus]	AnBSV	Dwarfed plant	164	40	114	45.73	123.6	4e-28	76	98	CTAGTACTCCCACAGTAATTACAATCATGCAGCATTGTAACAATCTCAATCAGATTGTAG GAAGAAACTTCTTAGGAATTTCTAAACTTTTATCATATTTTGGTTTAAGTAGAGACCCTA GTGAAAAGTTCTCCAAAGAACCATCTGTCTTTAACAATCATAAAAAATTGTTTTTAGATA GGGGGAAGGATAAGGATTTACAACCCTTATTAGAAAAAATCTATGATA	YP_009666500.1
34	c19675_g1_i1	206	9	1.46	Ortervirales	Caulimoviridae	circular dsDNA,RT	Caulimovirus	[Angelica bushy stunt virus]	AnBSV	Dwarfed plant	137	79	136	42.34	49.7	7e-06	66.67	39	CAAAGACAGATCAGAAGACTTCAAGCGATTGAAGAAAGGATCTTCCAGCAGGAAGATGAA CAACGAGAGGGAATGTTCGATCCCCAAGAGTGCCATGCCTTCTGTTTCTGCAGAGGTAAA CACTAAAATTCCGCCGGAACACCCCCCTTCTCATCTTGGTATCAGAGCCTTGTGATTAAG GTAAAAGTTCTTGTTATTAATTCTTC	YP_009666505.1
35	c64626_g1_i1	205	8	3.79	Ortervirales	Caulimoviridae	circular dsDNA,RT	Caulimovirus	[Angelica bushy stunt virus]	AnBSV	Dwarfed plant	528	154	219	12.5	120.2	4e-27	83.82	99	AAAGAACCAAACCCAGCTAGAGATTTTTATCCTCCAACAACTGAACTTAGAATAAATAAC TCACCTTATGGTAGTAATGTTCTAAATTTAGAATGTGAATCTATGAAAGATCGTAGATTA CGTATAGACTTATGGTCTAAGGAAATGAGCCTAATCATTAGTACAAATCCCTCTGTTTAC GACAGTCAACAGAAGATTTTGCTAC	BCM78266.1
36	c112224_g1_i1	201	6	1.08	Ortervirales	Caulimoviridae	circular dsDNA,RT	Caulimovirus	[Angelica bushy stunt virus]	AnBSV	Dwarfed plant	528	449	492	8.33	96.7	5e-20	85.94	95	AGGAAAGTATTTGCGCAGCAAAAAGGATTATCCCAAAGATAAATCTAAACACTGCCCAAA GAAAAAGAAGAATTGTAGATGTTGGATCTGCAATATAGAAGGACATTATGCGAATGAATG CCCTAATAAAAAAGAACACGATAACAAGGTTAAAGTGTTAGAGCAAATCCTTCAAATGGA ATATATTCCAGTTGAAGATTT	YP_009666502.1
37	c136347_g3_i2	1829	2698	7.73	Mononegavirales	Rhabdoviridae	ssRNA (-)	Varicosavirus	[Aponogeton virus 1]	ApoV2	Asymptomatic plant	501	152	474	64.47	111.7	1e-23	41	67	CTAAACTGTATAGAGGGAGAAATAAATTGTTTATGGTTTATTATGAATTTTTATTAAAAT ATAATTTTATTTCAATAAATTTGCACTGAATTCAAAACGTAAGCAGGAGTTTTCATATGT GAAAATGAAACGGCAGGAAGTGTAAACGTTTCGCGCTCTGGAGACACCGATTGGTCGTGC GAGAGAGAGAGAGAGAGAGGCGCTTCTATTTAAGAATCAAAACAAACCTATGCTCTCGGT ACTCCCACATCAATCATCCTCAAAGATTCTTGGTTTAAGTCGTGTAATTGCAGGTATGAA GAGGAAGAGAACTACCGAGAAAGCTGAATCAGAACAAAAAGAGGATATCCCAAGAAATCC GAGCCCTATCGGTGTTGTACCTGTTGTCAACCA…	DAZ90642.1
38	c133890_g1_i2	1789	1205	10.52	Mononegavirales	Rhabdoviridae	ssRNA (-)	Varicosavirus	[Aponogeton virus 1]	ApoV1	Dwarfed plant	501	152	474	64.47	111.7	1e-23	41	69	CTAAACTGTATAGAGGGAGAAATAAATTGTTTATGGTTTATTATGAATTTTTATTAAAAT ATAATTTTATTTCAATAAATTTGCACTGAATTCAAAACGTAAGCAGGAGTTTTCATATGT GAAAATGAAACGGCAGGAAGTGTAAACGTTTCGCGCTCTGGAGACACCGATTGGTCGTGC GAGAGAGAGAGAGAGAGAGGCGCTTCTATTTAAGAATCAAAACAAACCTATGCTCTCGGT ACTCCCACATCAATCATCCTCAAAGATTCTTGGTTTAAGTCGTGTAATTGCAGGTATGAA GAGGAAGAGAACTACCGAGAAAGCTGAATCAGAACAAAAAGAGGATATCCCAAGAAATCC GAGCCCTATCGGTGTTGTACCTGTTGTCAACCA…	DAZ90642.1
39	c146328_g1_i1	6507	45792	100.49	Tymovirales	Betaflexiviridae	ssRNA(+)	Capillovirus	[Apple stem grooving virus]	ASGV	Dwarfed plant	2105	1	2105	100	3758.8	0	99.47	96	GCTTAATTTCCGCGCTTTACGTCAATGGCTTTCACTTACAGAAATCCCCTAGAAATTGCA ATAAACAAACTTCCAAGTAAGCAGTCTGATCAACTGCTTTCTTTGACCACAGACGAGATA GAAAAGACCTTAGAGGTGACCAACCGCTTCTTCTCTTTTTCTATCACCCCAGAAGATCAA GAATTGTTGACCAAACATGGTTTAACACTTGCGCCAATTGGTTTCAAGTCACACTCCCAT CCAATATCCAAAATGATAGAGAATCATCTCTTGTATATATGTATTCCTAGCCTTTTGTCT TCCTTTAGGTCAGTTGCCTTTTTTTCTCTGAGAGAAAACAAAGTAAATAGTTTTCTGAAA ATGCATTCAGTTTTTTCACACGGAAAAATTAAA…	BBK03478.1
40	c144516_g3_i3	6505	16018	11.83	Tymovirales	Betaflexiviridae	ssRNA(+)	Capillovirus	[Apple stem grooving virus]	ASGV	Asymptomatic plant	2105	1	2105	100	3757.2	0	99.57	96	GCTTAATTTCCGCGCTTTACGTCAATGGCTTTCACTTACAGAAATCCCCTAGAAATTGCG ATAAACAAACTTCCAAGTAAGCAGTCTGATCAACTGCTTTCTTTGACCACAGACGAGATA GAAAAGACCTTAGAGGTGACCAACCGCTTCTTCTCTTTTTCTATCACCCCAGAAGATCAA GAATTGTTGACCAAACATGGTTTAACACTTGCGCCAATTGGTTTCAAGTCACACTCCCAT CCAATATCCAAAATGATAGAGAATCATCTCTTGTATATATGTATTCCTAGCCTTTTGTCT TCCTTTAGGTCAGTTGCCTTTTTTTCTCTGAGAGAAAACAAAGTCAATAGTTTTCTGAAA ATGCATTCAGTTTTTTCACACGGAAAAATTAAA…	BBK03475.1
41	c140166_g1_i1	3202	2116	3.28	Tymovirales	Betaflexiviridae	ssRNA(+)	Capillovirus	[Apple stem grooving virus]	ASGV	Asymptomatic plant	2105	72	1138	50.69	2069.3	0	96.06	99	CCATCCAATATCCAAAATGATAGAAAATCATCTCTTGTATATATGTGTTCCGAGCCTTTT GTCTTCCTTCAAGTCAGTTGCCTTTTTTTCACTTAGGGAGAGTAAAGTGAATAACTTTCT CAAGATGCACTCAGTCCTTTCTCATGGAAAGATCAAATCTCTAGGGATGTACAATGCCAT AATTGATGGGAAAGACAAATATAGGTATGGTGATGTGAATTTTTCGTCCTTTAGGGATAG AGTAATTGGTCTTAGAGATCAATGCCTTACACGTAATAAATTTCCAAAAGTTTTGTTTCT TCACGATGAGTTGCACTTTTTAAGTCCATTTGACATGGCTTTTCTATTTGAAACGATCCC AGAGATTGATAGAGTCGTTGCAACCACAGTCTT…	BBJ35800.1
42	c144566_g5_i1	2593	8387	48.58	Tymovirales	Betaflexiviridae	ssRNA(+)	Capillovirus	[Apple stem grooving virus]	ASGV	Dwarfed plant	2105	275	1138	41.05	1664.4	0	95.49	99	TCATGTTTTCTCATTTGACAGAGGAAGGGCTTGCAACGAATTTAATCATTTCAACAAACC CAGCTGTCTACTTGCGGAAGAGATGCGGCTTTTGACAAAGAGATTTGACAAAGCAGTCAT CAACAGAAGCACAGTCTCTTCTCTTAGCACATACATGGCTTGCCTCAAAACTGCAAATGC GGCTTCAGCTGTTGCCAAGTTGAGACAGTTGGAGAAAAGAGATCTTTACCCAGATGAGTT GAACTTCGTCTACTCCTTTGGAGAGCACTTCAAAAATTTTGGGATGAGAGATGACTTTGA TGTGTCAGTTTTGCAATGGGTTAAAGACAAATTTTGTCAGGTTATGCCCCACTTCATTGC CGCTAGTTTTTTTGAGCCGACAGAATTTCATTT…	BBJ35800.1
43	c144566_g4_i1	1222	3756	51.09	Tymovirales	Betaflexiviridae	ssRNA(+)	Capillovirus	[Apple stem grooving virus]	ASGV	Dwarfed plant	2105	1132	1538	19.33	817.8	2e-236	99.26	99	TTTTGACACAGACCCAATGCTTGCGGAGATATTTGAGAAGGTTGCAGCAAAAGAAAAGAG GGAATTCCAGTCTGTGTTAGGTCTTTCAAATCAATTTCTTGACATGGAGAAGAATGGATG TAAGATAGACATCCTGCCCTTTGCGCGACAAAATGTTTTCCCACACCACCAAGCGTCTGA TGATGTTACTTTCTGGGCAGGCGTTCAGAAAAGAATTAGAAAGTCAAATTGGAGAAGAGA GAAGTCAAAATTTGAGGAATTTGAAAGCCAAGGAAAGGAACTTCTTCAAGAATTTATCTC AATGCTGCCATTTGAATTTAAAGTGAACATCAAGGACATAGAAGATGGAGAGAAGAGCTT TTTGGAAAAGAGAAAGCTAAAGTCCGAAAAAAT…	QDK54738.1
44	c134748_g2_i2	910	405	2.67	Tymovirales	Betaflexiviridae	ssRNA(+)	Capillovirus	[Apple stem grooving virus]	ASGV	Asymptomatic plant	2105	1236	1538	14.39	611.7	2e-174	99.34	99	TGAATTTAAAGTGAACATCAAGGACATAGAAGATGGAGAGAAGAGCTTTTTGGAAAAGAG AAAGCTAAAGTCTGAAAAAATGTGGGCAAATCATTCGGATAGATCAGATATTGACTGGAA ACTTGACCATGCCTTTCTCTTTATGAAATCACAATATTGCACGAAGGAGGGGAAGATGTT CACCGAAGCTAAAGCTGGCCAAACTTTAGCTTGCTTCCAACATATAGTTCTGTTCAGATT TGGGCCTATGTTGAGGGCAATTGAAAGTGCCTTTTTGAGAAGCTGTGGAGATTCGTATTA CATACACTCTGGGAAGAATTTCTTCTGCCTGGACAGCTTTGTAACAAAGAATGCTAGTGC CTTTGATGGATTTTCAATTGAGTCAGACTACAC…	QIQ53043.1
45	c75460_g1_i1	633	66	2.13	Tymovirales	Betaflexiviridae	ssRNA(+)	Capillovirus	[Apple stem grooving virus]	ASGV	Dwarfed plant	2105	72	281	9.98	423.3	7e-118	98.1	99	CCTCTGTCAAATGAGAAAACATGATGAGCAAAGAGACTCTGTAGCTTGGTCACCCTGATC TTTCTGTTGGCCCATTGTATGCCACTGCAGGTAAAAGGCCATTTAGAATTTGCCAAATTC TGTTCGTAACATTCAGAGGCAACACCATCCGGATAAAATGAAAATGAAGAACCATGAACC TTGTAGGTGTAAACCCTGGGCTCCTTAGAGACCTTGTCCCCAAATAAGAGTTCTATTGGA AAGACTGTGGTTGCAACGACTCTATCAATCTCTGGGATCGTTTCAAATAGAAAAGCCATG TCAAATGGACTTAAAAAGTGCAACTCATCGTGAAGAAACAAAACTTTTGGAAATTTATTA CGTGTAAGGCATTGATCTCTAAGACCAATTACT…	BAP81789.1
46	c123962_g1_i1	507	43	1.97	Tymovirales	Betaflexiviridae	ssRNA(+)	Capillovirus	[Apple stem grooving virus]	ASGV	Dwarfed plant	320	60	228	52.81	345.1	2e-94	99.41	100	CGGGGATTTGTGATCCAGGATGGCCATTTTGATTTCTTCATTAAATTTAAGTGCTTCACA GCCGCTGATTGCCTGTGAAGCCCACCCTGAATCACCAGTTTTGGTTTCCAGAAACCTTGC AGAATTGACGCATCTGTATGCAACTCCAATGTCAAGAGCGAACAACTCGGTGTCCTGTTC ATATTGTGGACAATCAAAATCCACACGGAACCTAAACCTTTTTGCCAAATTTGCGTCTGT GGTGGACAAACAATGCTCTGGCCTGAGACCAAAGTAGCAACAGTCAGACTCAAACCTGAA AAGATATGAGCAGATGTGGCCTCTTTCTGGATCCAGGCAGGCTCCATCATATACAATGAC TCTTCCTTCCAAGCCTCTAAAATTTGGCAGCAT…	AFM37528.1
47	c134748_g3_i1	334	55	1.93	Tymovirales	Betaflexiviridae	ssRNA(+)	Capillovirus	[Apple stem grooving virus]	ASGV	Asymptomatic plant	2105	1132	1242	5.27	224.2	3e-58	98.2	99	TTTTGACACAGACCCAATGCTTGCGGAGATATTTGAGAAGGTTGCAGCAAAAGAAAAGAG GGAATTCCAGTCTGTGTTAGGTCTTTCAAATCAATTTCTTGACATGGAGAAGAATGGATG TAAGATAGACATCCTGCCCTTTGCGCGACAAAATGTTTTCCCACACCATCAAGCGTCTGA TGATGTTACTTTCTGGGCAGGCGTTCAGAAAAGAATCAGAAAGTCAAATTGGAGAAGAGA GAAGTCAAAATTTGAGGAATTTGAAAGCCAAGGAAAGGAACTCCTTCAAGAATTTATCTC AATGCTGCCATTTGAATTTAAAGTGAACATCAAG	BAP81792.1
48	c144566_g3_i1	243	4	1.01	Tymovirales	Betaflexiviridae	ssRNA(+)	Capillovirus	[Apple stem grooving virus]	ASGV	Dwarfed plant	2105	1074	1154	3.85	161.8	2e-39	97.53	100	CTGGAATTCCCTCTTTTCTTTTGCTGCAACCTTCTCAAATATCTCCGCAAGCATTGGGTC TGTGTCAAAAACAGGCACATGACATTTGAACCATTCAACGGGTTGAATCACGTCCCCAAC GACTTCCTCCGGATCAACTTCTTCCTCAGCTAAATTTATAAAAGGCATTATAAACAAGTC ATGAGAAGCTTTGTCTTGAATTGATGAATTTCCAACATCCAAAGGGCTTTCATAAAAGCT GGC	BAP81792.1
49	c144972_g1_i1	2923	124292	212.74	Sobelivirales	Solemoviridae	ssRNA(+)	Enamovirus	[Arracacha latent virus E associated RNA]	ALVE	Asymptomatic plant	757	128	738	80.71	441.8	9e-123	49.5	61	GCTGGGTGCGGACTTAATCACCGTTTGCCTAGCGCTATGGTCCTTCCTGCTCCACGTGTG CACTGCATGCGTGGACCTGTTGGGGTTCACTCTAGCCCACTTCAGGACAGAGGCAGCCGT CCTTATAGCTGCCTCTGTGTGTATATTTAGTTTGTATTTGACCTACATCTTGGTTAGCGA GATTAGGTGGTCGGTGGGCTTCATGGATTTCATGAAGCTCATCAATAGCTCAGGTGGAGA GTCCCTAGAGGATCTCGTCGACACCCTCCCCACGGAGGAGGAAGACCTGATCTTCAACAC CGCCAATGTCCAAATGGCGAAAGTGAGAGACTGGCTTCTGGAGCATGTGGAGTCGCTGAC TAGCAGCGGCCGCAGTGTGTCTGAGGCATGTTT…	AUD57825.1
50	c146739_g1_i1	2906	283302	1450.67	Sobelivirales	Solemoviridae	ssRNA(+)	Enamovirus	[Arracacha latent virus E associated RNA]	ALVE	Dwarfed plant	757	128	738	80.71	438.3	1e-121	49.5	61	CGATAGGCGCGGATATAATTACCGTTTGCCTAGCGTTGTGGTCCTTCTTACTCCACGTAT GCACATCATGCGTGGACCTGTTGGGGTTCACTCTAGCCCACTTCAGGACAGAGGCAGCCG TCCTTATAGCTGCTTCTGTGTGTATTTTTAGTTTGTATTTGACCTACATCTTGGTTAGCG AGATTAGGTGGTCGGTGGGCTTCATGGATTTCATGGAGCTCACCAATAGCTCCAGTGGAG AGTCTCTGGAGGATCTGGTTGACACCCTCCCCACGGAGGAGGAAGACCTGATCTTCAACA CCGCCAATGTCCAAATGGCGAAAGTGAGAGACTGGCTTCTGGAGCATGTGGAGTCGCTGA CTAGCAGCGGCCGCAGTGTGTCTGAGGCATGTT…	AUD57825.1
51	c144610_g1_i1	1414	1880194	21512.4	Sobelivirales	Solemoviridae	ssRNA(+)	Enamovirus	[Arracacha latent virus E associated RNA]	ALVE	Dwarfed plant	757	340	733	52.05	369.8	2e-101	84.93	88	GAAGTGTTTTGGGGGCCGCAAGCTTGCTATATACTCTAGAGCTTTAGAGTCCCTGGAGGT AGAGGGCATTGGCCCACGTGATTTCGCTGTCCGTGCCTTCATCAAGAAGGAGAAAGACAA AGACGGACAGACAGATCCTCGCATTATCCAGCCGCGAAGTCCAAGATTCCATGTGAGTTT TGGGCGGTATGTGCGGGCCATGGAGGGATTCCTCTATAAGAGGTGGAGCCGTCTGTGGCA GAAGAGCTTTCGTACCAGCAACACCCCCGTGATCTTCAAGGGTTTCAACTATTGGGAGAG GGGTAATTTCTTTGCAGAGAAATGGGCTACCTTTAACAAGCCTGTTGCTGTAGCTCTCGA CGCAAGTCGCTTTGATCTGCATGTAGGATGTGA…	AUD57820.1
52	c144137_g1_i1	1393	40908	160.19	Sobelivirales	Solemoviridae	ssRNA(+)	Enamovirus	[Arracacha latent virus E associated RNA]	ALVE	Asymptomatic plant	757	340	733	52.05	369.4	3e-101	85.17	90	GAAGTGTTTTGGGGGCCGCAAGCTTGCTATATACTCAAGAGCTCTAGAGTCCCTGGAGGT AGAGGGCATTGGCCCACGTGATTTCGCTGTCCGTGCCTTCATCAAGAAGGAGAAAGACAA AGACGGACAGACAGATCCTCGCATTATCCAGCCGCGAAGTCCAAGATTCCATGTGAGTTT TGGGCGGTATGTGCGGGCCATGGAGGGATTCCTCTATAAGAGGTGGAGCCGTCTGTGGCA GAAGAGCTTCCGTACCAGCAACACCCCCGTGATCTTCAAGGGTTTCAACTATTGGGAGAG GGGTAATTTCTTTGCAGAGAAATGGGCTACCTTTAACAAGCCTGTTGCTGTAGCTCTCGA CGCAAGTCGCTTTGACCTGCATGTAGGATGTGA…	AUD57820.1
53	c143404_g1_i3	1102	37257	193.22	Sobelivirales	Solemoviridae	ssRNA(+)	Enamovirus	[Arracacha latent virus E associated RNA]	ALVE	Asymptomatic plant	755	72	315	32.32	84	2e-15	75.62	54	GCCCTCGGGCGCCCCCGGATGATGGCGGGACGTTTCGGCTTTAACATGGCCGGAGTTTCA CACTCCCTCAGCCCAACCCCAGCGGTGGCGTCACACGTTGGGGCATCTGTGGCTGGGTTA GCAACCGCTGCGGTCCGGATTAGCCGGAACGCAGCACCACAGCTCAGGCTAGCTGCAGCT GTGGGTGTAGGAGTCTACGGTGCCTGGAGGCTCGCTCGGGAGGTTAGAGCGATGCGAGCC GCCAGGTCTCTCACCCAGACCTGTGATGACACGGAGGAGTCCGTTTTCGGGCCCACCGTG GAACAGGTTGAGGCTGGCGTTTTCAACGTCAACCTCACGGGTGAAGATGAGAGCCCTGTC CAAGGGCTCCCCGTGCAAGGAGAGGCTAGCGCA…	AUD57825.1
54	c140753_g1_i1	1078	1872741	29677.2	Sobelivirales	Solemoviridae	ssRNA(+)	Enamovirus	[Arracacha latent virus E associated RNA]	ALVE	Dwarfed plant	757	42	316	36.33	83.6	2e-15	74.63	55	GCGGGACGTTTTGGCTTTAATATGCCTGGCGTTTCACACTCCCTCAGCCCAACCCCAGCG GTGGCGTCGCACGTTGGGGCCTCTGTGGCTGGGTTAGCAACCGCTGCTTTCCGGATTAGC CGGAACGCAGCACCACAGCTCAGGCTAGCTGCAGCTGTGGGTGTAGGAGTCTACGGTGCC TGGAGGCTCGCTCGGGAGGTTAGAGCGATGCGAGCCGCCAGGTCTCTCACCCAGATCTGT GATGACACGGAGGAGTCCGTTTTCGGGCCCACCGTGGAACAGGTTGAGGCTGGCGTTTTC AACGTCAACCTCACGGGTGAAGATGAGAGCCCTGTCCAGGGGCTCCCCGTGCAAGGAGAG GCTAGCGCAGCCGCTTCCCAAGCTAGGTTAGCT…	AUD57825.1
55	c12817_g1_i1	475	33	1.69	Ortervirales	Caulimoviridae	circular dsDNA,RT	Caulimovirus	[Atractylodes mild mottle virus]	AMMV	Dwarfed plant	514	118	166	9.53	62	3e-09	37.84	95	CCTAACGGGAGAATTCAAATCCCAAATAAAACTAAAGAACAATCTTTAGTAATTCCTTAC GGAAGTAAGAGTATTTAAAGCTCTAATTACTATGTTGTTTATAACGGTCCCAATCCAGGA ATCTATAACAACTGGGCAATTGCTAGCCAAGCGATAAGAGGAATGAATTTCAGGAGTTTC TCACAAGAAGTTCAAGGATTTCCAAGTAGCAGGAGTATCAACCGATCGCTACACCACAGA AATGAGTAAGCCACCTTTGTGTCTTATCAACTCTGCAGACGCATTGAAGCCAACCTTCAA ACAGGCGTTGAAGAAAACATCAGACAACAAAGTCGTGCTGGGAAAAGTAAAGTCAGAAAA TCTTATTATAGATTTTAAAGACGATAGCGGAGA…	YP_009165751.1
56	c109432_g3_i1	405	25	1.72	Ortervirales	Caulimoviridae	circular dsDNA,RT	Caulimovirus	[Atractylodes mild mottle virus]	AMMV	Dwarfed plant	315	218	288	22.54	87.8	5e-17	57.14	60	CGAATAGTCATCACAATATAGACTATAGAAAGAATGAATATGTTGAATTAGACGATGTAT TCTCAGAAATAGGATCGATAGAAAAGAAGCAATTCTTAGATACCAGTCCTTTAGATGATT CTTGGGCAATCGACATTGCAAAGAATAAACCCTTTCTAGGAGAAAAACCTAGATTTAGTG TCGGGAGAAATAACCTAGAGATAGGAGAAACCTCTGACAGAGATAACAGAAACGATATGA GCCTTTCCTTAACATCGTTTCCAAAAGAATAGATAACTTAAGTCTTTAGTTAGAAAAATT GTTTTAAGATTTCAGTTATGGAGAATCTTTTAGAAAGATTTAAGGAGTTCCAAAAGGACT TCGATCAGGTTATTAAGCCCCAAATAGAAGAAA…	GEX56607.1
57	c143502_g3_i1	385	20	0.51	Ortervirales	Caulimoviridae	circular dsDNA,RT	Caulimovirus	[Atractylodes mild mottle virus]	AMMV	Asymptomatic plant	514	151	281	25.49	82.8	1e-15	40.16	98	CGTTTACTTTATCAGTAGTGTAGAAACGATGATCTACAAACTCCTGATCTCCTGCCAATC TTCCTAGCTCATAGAAATACCTAAAGCTGTCGTAGATTGTTTCTCCAGAATCTTCTTCAA AATTAATAATAAGATTCTCGGTTTTGACTTGTCCTAGAACCACCTTGTTGGAAGTGGTTG GGATCTTCTTTAAAGCCTGCTTAAAGGTCGGCTTTAATCCTTCTGCTGAACTAATGAGCC TTAGAGATGGCTTCAAAACTTCTTTAGAATAAATGTCGGCTGCGACTCTAGCTTCCTGGA AACTCTTGTATTTCTTATGAGTGACTCCAGAATTTCCTGCCACTGCGAGACTTGCTATTG ACCAGTTTTTGTAAATGCCTGGATT	QVW10189.1
58	c114197_g1_i1	303	13	1.72	Ortervirales	Caulimoviridae	circular dsDNA,RT	Caulimovirus	[Atractylodes mild mottle virus]	AMMV	Dwarfed plant	169	6	41	21.3	49.3	1e-05	61.11	35	CTCAGAAATTAGTCCCTTAGAAAATTCTTGGGCAATTGATATTGCTAGGAATAAACCGCT CATGGGAGAAAGACCGAGAATGAGCTTTAAAGGGAAACCTAGTAATAGGCGAATCCTCTG ATAGAGATCTTCTTAGAAATGTCTCTACTAGAATAGACAGCTTAAGCCAGAAGTTAGAAC TTCTTGGATAAAATGTCTAATTCCTTAACTGTAAATCCCCATATTTACAAAAAAGGAAAG ATTCTCAACTTCAAGAGATTGAATGAAGGAGATGAAAGAGAGCCGAAGAGTTACGACTTT AGC	YP_009165747.1
59	c134841_g1_i1	610	26	0.89	Mononegavirales	Rhabdoviridae	ssRNA (-)	unassigned	[Bacopa monnieri virus 3]	BmV4	Dwarfed plant	1264	993	1191	15.74	52.8	3e-06	40	31	GAAAGAGTTTTAACTCAATATTATAAATTGGATGGAATCAATATGCCTAAAGGAAGTAAG GTTATCAGTATAGAAACAAAAATGGTATACGCCATAACAGGAAATCATCATATTAAAAAG CAAACAGATATGTGTGCAATGGTACCAAAATTATACCAAGATATATTAGAAAAAATTGAG CATAAAACTGAATCTCTAATAACAATCCCTGAAGAAATTAGTATAGATTTTTATAATAGA CAAATAAAACCTGTACCAAGAGTTAAACCTATAATAGAAGGATCTAGGTTAAGTTTTAGA AGAGAAAGAAATACGATAAATCTAAGTAGAAGCATGTCTAGCAGAAATATGGATTTAATA AAATTACATTATAAAGAAAAAGATAAATTGAGA…	DAF42457.1
60	c149722_g1_i1	539	99	1.38	Mononegavirales	Rhabdoviridae	ssRNA (-)	unassigned	[Bacopa monnieri virus 3]	BmV3	Asymptomatic plant	419	125	242	28.16	80.5	1e-14	36	62	GAAATATAGACACACCAATACAAATATATATGCTAGAGGATAGGATACTAGGTAATTTAC AAGATGCTTTAATATTAGTAATTAAAGGAAATTTAATATATCAAAAACTAAAATTTACGG TACAACCAGATTTTTTCATATCTTTAAAAGATGAACACAAAGACTGAGCTTTAACTTTAT ACTATAAATTAGATGGGATTACAATGCCATCACGAAGTAAAGTCATAAGTATTGAAACAT AAATGATTTTCGCAGGAAACCATCATGTAACTAAGCAAAATGAATTAAATATTCTAGTAC CAAAAATGTATAAAGAAATACTAGAACAAATAGAACATAAAAAAAATTCAAAAATAACAA TACCAGAAGAAATATATATGGATTTTAATAAAA…	DAF42457.1
61	c116822_g1_i2	472	37	1.92	Ortervirales	Caulimoviridae	circular dsDNA,RT	Badnavirus	[Blackberry virus F]	BVF	Dwarfed plant	1948	748	902	7.96	245.4	2e-64	67.95	99	GGCTCTGGCTGCTAAATCAGGGAGAATGTTCATATCTACCGAGCTGTCAGATAAATTGTT CAGGAAGATGCCACCACTAGTTGGGAAGGAATTAGAGAAAGCATACAATGAGAAATATCC AGGAGCATCAGTTGGAGTGTTGCCCAGAATTCATTTCTCATACCAATACCTGGCGGACAT GTGCAAAAGGGCAGCTTTACAGAGAGGTCTGAAGGACCTATCGTTCTGCAGTAAAGTCCC GATTCCAGGATATTATGGAAACAAAAAGAAGTATGGAATCAGGAAGGCAAAGACGTACCA AGGAAAGCCACACGATTCACATATTCGTGTCTTTAAGAAGAAACATCAGGACAAAAATCG AAAGTGTAAATGCTTCATATGCGGAACGGAAGG…	XP_042468102.1
62	c103335_g1_i1	344	11	0.36	Ortervirales	Caulimoviridae	circular dsDNA,RT	Badnavirus	[Blackberry virus F]	BVF	Asymptomatic plant	1948	95	211	6.01	137.9	3e-32	75.82	79	TTTATATCAATTTTCTAATATTGCATACCGTTTTCGGGAACCAAATATTTATAATTTAAT TAGATTTCATAAAAGTCTTGATAGACTCAGAAGAGAAGGACTACAGCATATCCATGTAGG ACTAATGATGGTACGAATTCAGGCGTTACATCGGAGGAACGCTGGAACGAATGCACTGGT CGTCTTGAGAGATACCAGGGGGCAAGACGATAGATCCATCCTCGGAACCATGGAAGTGGA CCTCTCAACAGGAACCCAGCTTGTCTATATAGCCCCAGAACTAATGATGAGCATAGAAGA TTTCGCTAATCATATTCAGCTGGCTATCCAAACAAGAGGATACG	KAMF642729.1
63	c90195_g1_i1	341	15	1.49	Ortervirales	Caulimoviridae	circular dsDNA,RT	Badnavirus	[Blackberry virus F]	BVF	Dwarfed plant	1948	133	245	5.8	176	1e-43	76.11	98	CTACATTCGCAACATTGTACCTGAAACCTACGTTGCTTTCATTTGTTATCCTTCCAATCA AGGATCTTGTGATTAGCAAGTTGCTTTCACCCATCCACTCTTCGTATCCTCTTGTTTGGA TAGCCAGTTGAATATGATTAGCGAAATCTTCTATGCTCATCATTAGTTCTGGGGCTATAT AGACAAGCTGGGTTCCTGTTGAGAGGTCCACTTCCATGGTTCCGAGGATGGATCTATCGT CTTGCCACCTGGTATCTCTCAAGACGACCAGTGCATTCGTTCCAGCGTTCCTCCGATGTA ACGCCTGAATTCGTACCATCATTAGTCCTACATGGATATGT	KAG6490941.1
64	c119361_g1_i1	204	6	2.9	Ortervirales	Caulimoviridae	circular dsDNA,RT	Badnavirus	[Blackberry virus F]	BVF	Dwarfed plant	1948	1268	1325	2.98	60.5	4e-09	50.75	98	CAACACTCAGCAGGAAGTTATTGCCAAGGCAATTCCAGAATTTGACATGGATTATGAAGA ACTCCAGGAACTACAGGAAGTAGTATATTTTAACCTGGAAAAAGGAAGCAAGAGTTTCAG AGCAAAATGTGGACCCCTTCTGAAGAAACTCGAAGAAGGAGGATTTATAGGAGAGGAGCC CCTGAAACATTGGCAGAAGAATAA	KAD5508025.1
65	c110939_g1_i2	341	19	1.89	Ortervirales	Caulimoviridae	circular dsDNA,RT	Vaccinivirus	[Blueberry fruit drop associated virus]	BFDaV	Dwarfed plant	2597	1760	1862	3.97	144.8	3e-34	64.15	93	GCTAAATTATCACTATATATTAATATATCATCAACATATACTATGCAGAATTCGTTCATA TTTCTAAATATCTTATCCATTCTTCTTTGAAATATTTGTGGTGCATTCATTAATCCAAAT GGTAATACTATCCATTCATAATGTCCTTCTGGGACACTAAAGGCTGTTAATCCTTTTGAC TCTTTGGTGAGTTTTATTTGCCAATAACCACTTTTACAATCAAATTTACTGAACCATTTT TTATTGACTAATCTATTAATCAAATTTCTTTTATATGGCAAAAAATATCCATCAAATATT GTCATTTTATTTAGTTCTCTATTAGTCTATAACCATTCTAG	KAA3485339.1
66	c110270_g1_i1	327	12	1.31	Ortervirales	Caulimoviridae	circular dsDNA,RT	Badnavirus	[Cacao Bacilliform SriLanka Virus]	CBSLV	Dwarfed plant	1772	832	936	5.93	107.5	4e-23	46.3	99	TGTAGAATCGCTATTTGTTCTCCTAGAAGAAGGAGAAGCATCACCCTGGCTGCATAAGAT TCAACTAACAGGGAAGCAAGGAATATGCAAGCACACATGGGAAGAGAATCAAGTAATCCA AGACGCAAGTTGGATTAATTGCAACTTCTGCAAAATAAGAACGAATGAAAGAATGAGAAT TCACTGCAGTTTATGCAAAGTAACGTCATGCCCTATGTGCTCAAAGTTTCAGCTAAACTT AAAAATCAACCCAAAACCCCCAGAAGCAATAGTGCCTCAAAGCATGGAGCAATTGGTACA AGAATTGCTGAAATACATTACCTATCT	YP_009553548.1
67	c134699_g2_i1	645	45	1.42	Ortervirales	Caulimoviridae	circular dsDNA,RT	Caulimovirus	[Carnation etched ring virus]	CERV	Dwarfed plant	489	177	369	39.47	193	2e-48	50.54	86	AAGATTTCTTTTTCTTTTTAAACTCATATTTAGAAGTATATTTTTTAAACTTCTTTTTCT TCTTGTAGGTGCTTCTATCCGAAGGTCTACAACCATAATCTAATGGTGTTTCAACTAAAT TTTTACAACATCTTTTGTTGAAAGCTTTTAGTTGTTTTTGTTTTTTAGTTAATTCACAAA TCTTAGCGATTTCTTCTTTAACTAATTTCTGAGCGTAGCCTAAGCTATGTTCAGTAACCT CGTTAGCTTCTAGATTAAATCTTTCTAACGTTTTTTGTCCAACTAAGGGAATTTTAAGAA GATAGTCTCTAACGTACTTCTTATATTCTAACTGATCAGGGATTAGATATAGGTTTTTCT CGTAGTCACAGAAAAATGAGTCAAGAAAACATA…	XP_035837120.1
68	c139044_g5_i1	259	0	0	Ortervirales	Caulimoviridae	circular dsDNA,RT	Caulimovirus	[Carnation etched ring virus]	CERV	Asymptomatic plant	659	419	503	12.9	141.7	2e-33	80	98	CAAGAAAAAAGCACAGCTCTTCAAAACAAAGATTAATTTCTTTGGTCTAGAAATTGATCA AGGAACGCATTGTCCTCAAGCGCATATCCTGGAACATATCCATAAATTTCCGGATAAGAT TGAAGACAAGAAGCAGTTGCAAAGGTTTTTCGGTATATTAACTTATGCATCTGATTATAT TGCAAAACTTGCAGCTATTCGTGCACCTTTGTAGGATAAGCTCAAGAAGGATATTCCATG TGAATGGAAAGATTCAAGA	NP_612577.1
69	c142213_g1_i2	242	3	0.77	Ortervirales	Caulimoviridae	circular dsDNA,RT	Caulimovirus	[Carnation etched ring virus]	CERV	Dwarfed plant	494	254	325	14.57	89.4	9e-18	59.72	89	TTACAAAAATCTGGGTTCTTACAGAAAGGCTTACTAATATGCAGTTATGTGATATATGTT TCTTAGAATCTAACTATTGTGATTATGAGAAAAACTTATATCTCTTAAACCAAGACGAGT ATAATAATTACGTAAGAGATTATCTTCTTAAAATTCCCTTGGTAGGACAGAAAGCACTAG ATAGATCTAATCTAGAAGCTAATAATGTCACTGAGTTCAGTTTAGGATTTGCTCAAAAAA TA	BBD88602.1
70	c139975_g2_i1	1879	275	2.27	Tymovirales	Betaflexiviridae	ssRNA(+)	Chordovirus	[Carrot Ch virus 1]	CChV1	Dwarfed plant	1857	99	714	33.17	719.9	1e-206	60.63	99	GTAGTTTCTATGAAAGAATCTAAATTGAAAATTTTTCATGATTCAGTTAAATCTCAGAAT AAAATATCTATCAATTTGATTAACAGATTGATGGATGTTAAAGATAGCTTTAGATATAAG GATAGTGATAGTATATCCGTTAAATATCCGACCATTTTGTTAGAGAGTAATACGAGAGAT TACGATCCTCTCTTGGATGTTAGAATCGAGAAAGGTGGTAATTTCTTGTTTCATGATGAG TTACATTATTGGTCTTTTGAGATGATGTTTAGTTTCCTGGAGAAATTTGAACCTGCTCAC GTGATTTGTACTGCAGTTTTCCCAATTGAAATATTTGAAGGAGTTAAGCAGTCTTTATAT CCTGAAGTCTACTCCTTTGAATTGATTAAAGAT…	YP_009103999.1
71	c143798_g1_i1	907	204	4.02	Tymovirales	Betaflexiviridae	ssRNA(+)	Chordovirus	[Carrot Ch virus 1]	CChV1	Dwarfed plant	206	164	206	20.87	78.6	6e-14	86.05	14	CAGGACATACCGAGTTCTGAATTAAGTAAGTCGGAGCTAAAAGTGAAACAATATCTTTAT CAACAATTAAAGAGGAGAGAAGCCAGGAGGAATCAATTCGAAGAGGACATTTCAGTTGTA GATTTTGAGTGATAGTTTGGCTAATTAAGATATTATTTGAGTTTCTCTTATATAGGTACT TTAGAAAGAGGAATTAGATAAATGTCTTCTAACTATTTATCAGAAAACGAGAAAGCAACA CTCTCAAGAGAGTGCTTTAAAATTCTCAAAAACATAGAAAGTTCCCTTAGAGAAATAAAG ACCCTACTTGAGGTGCAGGACAAAAGGTTAAAGACAAATGACAAAACCTTCTCCTCACTA AAAGATAAGGATCTAATTAGATTAGAAGTGAAT…	YP_009104001.1
72	c124032_g1_i2	643	39	1.23	Tymovirales	Betaflexiviridae	ssRNA(+)	Chordovirus	[Carrot Ch virus 1]	CChV1	Dwarfed plant	1857	1396	1608	11.47	400.6	5e-111	89.2	99	AAGTGATTGAGTCCAAAATGAAGGTTCACATCAATATAACTGATAAATCTTATGCTCTGG TGATAATAAATGATCAGATCAGAGCAAAGGAATCAAGAGAGTTCAGAAGCAAAGATGCCT GGTCGAATCAGTTTAAAGATGATGATAACAATTTGAATCTAGAAACTAGCACAGGGCCAG TCAATTTTGAAGCTATTTTCCCGAGGCACCAATCTTTTGATGATGTTACCTTCTGGATGG CAGTAAAGAAGAGATTGACATTTTCGAATCCATTAACTGAATCTGAGAAATTAAAGAAAT CATGGATCAAAGGTTCAATTTTGCATAAGGAATTCACTAGGTTAGTCAGAGTGGCTCCAA ACTTCAGACCTGATCTTTTTGATAAAGCTCTGA…	YP_009103999.1
73	c134548_g1_i1	595	58	2.06	Tymovirales	Betaflexiviridae	ssRNA(+)	Chordovirus	[Carrot Ch virus 1]	CChV1	Dwarfed plant	1857	754	948	10.5	255.4	2e-67	65.66	99	CAATTCAGTGCTTGTGAATGAGTACATCAGGGGTGGTCGTATCCCTTGGCATGCTGATGA CGAGAACGTTTATGATATCACTGAGAATCCAGTTTTAACCTTGAATCTGGTTGGGGACGG TCTCTTTTCTGTCAAATCAAAGGATGGAGATGAGCAGAGTTTTACAATGACACCTGGCAG TTGTTTGTTAATGAAGAGAGGCGCTCAGTCGATGATCAAACACTCTGTCATTGCTAAAAA TAAGAGAATATCCTTAACATTTAGGGAACAAATCAGGTCCTCTGATGGAATTGAGCAAAG GGCAACTTTATCTCTGGTCGAGGGTGATGTCAAAGATTTGAAGGAAGATTGTCTAATCAA GGCTCTTAGCGAGGAAATCAAAATTGATCGTTT…	YP_009103999.1
74	c143798_g2_i1	477	57	2.9	Tymovirales	Betaflexiviridae	ssRNA(+)	Chordovirus	[Carrot Ch virus 1]	CChV1	Dwarfed plant	206	1	61	29.61	85.9	2e-16	72.13	79	AGACCCTCCACATCATCATTTAAAAGTGATCGATTTAAGGTGGATCCAGTTCTCTTTGAT AAATTGAAGAGAGAGCAAGTTTCTAATTGGCTAAATAATGAGCTGCCGTTCAAGAATGTT GAAAGTAAGGAGGGGAATAGTGATGACAGCTCTCTTAGAAGAGTTGAAGTCTACGAACAC CTCAATTGAGATGGGAAAAACAATCGAAAGTTTAGATAGTATTCAGGGTAGTCTACTGAT TAATTTTAGGGATCATTTTCTAATAAATATGGCTGAGCTTGTACGTCTCCAGATACATCT TATGAGATGGAACCTTTCGATTTACCAAAAGTAACTCTTGTTTCTAATGGTGAAAAGAAA GATTTTCAATTAAAGATGAGTATTGGTGGCATA…	YP_009104001.1
75	c125606_g1_i1	421	44	2.81	Tymovirales	Betaflexiviridae	ssRNA(+)	Chordovirus	[Carrot Ch virus 1]	CChV1	Dwarfed plant	1857	977	1115	7.49	198.4	2e-50	66.19	99	GAGGTCTTTTCAAATCTTTTATAAATAAAGTAGATCCGAACAACAAATTTGTTAACAGAT TTGAGCGGGCACTAGATTTCGGTAGAGCTAGCGCTTTGATCGGAAGTCTATTGAGAGGCA CCACTGGAGTGATAAGTTCAAGTACTTTTGGAAATGGAGTAGATAACTTTACTGGAAGGA GGAGGAACGTTGATCCTGAGAGGTTGAGCGATCCAAAGTTCTTGAAAACCATGACTATGG GTGATGTGAGGATATCTGGGGCTGTGATAATGGGCTTTGCTGGCTGTGGAAAGTCTAGAC CTGTTCAAATGGCTCTGGAGTCTTTGGATACTCCACTAAAAATACTTTTCATATCTCCAA GAGTTAACCTCCTGAATGATTGGCAACGAAAAG…	YP_009103999.1
76	c125606_g2_i1	373	14	1.14	Tymovirales	Betaflexiviridae	ssRNA(+)	Chordovirus	[Carrot Ch virus 1]	CChV1	Dwarfed plant	1857	1108	1224	6.3	168.7	2e-41	70.94	94	AGTGGCAAGCAGGTGCAGTTTAGAACTTATGAGGCGGCGCTGAAAGAGAATTTCTCTAAG TTCAGCTTGATTATAATAGATGAGTTCTTACTTGCTCCAAGGGGATATACTGATGTGGTT GGTTACAAAAGTAGAGTTGATAATTTGACTTGCAAGAGAAATAATAGTGTGACTAAACTC CTACTTATTGGTGACCCGCTTCAATCCGTGTATTACAACAGCTCCGATGATGACATATTA GCGCCTGGATGTGAACTCAAAACGCTAGAGATTGATGACCCAAGGTATCTATTTTACTCA CTCAGGCTTCCAAGCTCTATGCAGGGGATGATGGACATCAAGATGTTTGGAGATGGAGGG GATGGAGTCAACA	YP_009103999.1
77	c139975_g1_i1	326	26	2.87	Tymovirales	Betaflexiviridae	ssRNA(+)	Chordovirus	[Carrot Ch virus 1]	CChV1	Dwarfed plant	1857	1	94	5.06	168.7	2e-41	78.72	86	CACCAATTAATCCGATATCATCCGGTATCATCTAAATCAATCATGTCTTATGGCTTCAGA ACTCCCCAGGAGAGGGTACTCGCAACCTTCAATCCCTCAATCATGGATAATGTTCAGGCT AATTCTGGCAGAACATTTGAAGATGAGGAAACCAGAATAGGTCGCTATTTCAATTATAAC CTAGATGATAAGAAGAAGGAATTTGCTTCCACTTCGGGCATATATCTTTCTCCTTATTCA TATAGGTCTCATTCTCATCCACTTTGCAAAACTATAGAAAATCATTTTCTATATGTTGTT ATACCTCCGATGGTGGCTGAATTTAG	YP_009103999.1
78	c120706_g1_i1	299	13	1.78	Tymovirales	Betaflexiviridae	ssRNA(+)	Chordovirus	[Carrot Ch virus 1]	CChV1	Dwarfed plant	1857	1299	1397	5.33	137.5	4e-32	60.61	99	TTGGTATAACTCGAGCAAAGAAGAATTTGAATTTTATCAAATGTTTCGGTTACCCCATTT CTGACTATCTCAAGAGAGCAGGAAGCAAAATGATAGGGAAAATTCTTATCGGATCAAAGA TCAAGAGACCGGAGTTAGAGAGTATGACAGGATTGGAGGACGTCCATTTCGTTACTGAAC CCCCAACTTTTGGAGGGCATGAGGAGAAAGTAGCTGGAGATCCTTGGATGAAAGGTTTGC TCTCTTTAGCAGAGGAGGTGGAAATTCCTGAAGTGTTAGTGGATGAACCTGAAGTGATT	YP_009103999.1
79	c143798_g3_i1	284	13	2.05	Tymovirales	Betaflexiviridae	ssRNA(+)	Chordovirus	[Carrot Ch virus 1]	CChV1	Dwarfed plant	338	159	252	27.81	161.4	2e-39	81.91	99	CTCAATCATGCTTCATTTTGAAAATTTGGACATGTTTGCTAGCAGTATACCAATCAACCT TAGCATTGGATTGATAGCTAGATTCTATAACACGATTGATCCAGGAGTAAGAATCATATC AGATGAACTTGATTTCCAGGGTTTGATTGGTTCTGAGGGTATTAGTAATAATGATATGCT AACTAACCTGGGTGATCTGAAAGAGTTATTCAATGATTCTGCTATCTTCAAACCGACGAT TGTTAGTAACTCACGTTTTGGTCGAGGAATCTTCAAGGACAAGG	YP_009104000.1
80	c131021_g1_i1	254	6	1.32	Tymovirales	Betaflexiviridae	ssRNA(+)	Chordovirus	[Carrot Ch virus 1]	CChV1	Dwarfed plant	1857	1617	1700	4.52	172.9	7e-43	94.59	87	GAAGAATTTTGATGAGTTAGAGAGATGGGTCAAAGGGAATTTCATTGGTCCAATCTGTGT TGAGAGTGATTATGAAGCTTTTGATGCCTCACAGGACGCCACCATCTTAGCTTTTGAATG CTTGATTCTAAGGGATGTTGGGTGGCCGAGTGACTTAATTGAGGATTACAAGACTCTCAA AATGGAACTGGGATGCAAACTTGGTATGCTAGCTATAATGAGGTTCACTGGAGAATTTGG TACCTTCTTCTTCA	QJI10667.1
81	c131021_g3_i1	232	11	3.27	Tymovirales	Betaflexiviridae	ssRNA(+)	Chordovirus	[Carrot Ch virus 1]	CChV1	Dwarfed plant	1856	1727	1803	4.15	146.7	5e-35	84.42	99	ATATTGGCTGATGCCAAAGTGAGGCATGATATGGATGATTTTATATCAACTCTCAAACTT AAAGCAAAGGTGGAGTGGAAGATTAATCCCGTGTTCTGTGGTTGGATCTTGAGCAGGAGA GGCATCCTCAAGCTACCTTCTTTGGTGTATTATAGGCTTTGTATAGCAAAGGAGAAAGGT AACTTGAGAGATTGCATTGATTCCTATATGATTGAGGCTGGATACGGATATA	YP_009103999.1
82	c136441_g6_i1	1518	351	1.24	Ortervirales	Caulimoviridae	circular dsDNA,RT	Caulimovirus	[Cauliflower mosaic virus]	CaMV	Asymptomatic plant	679	251	674	62.44	323.2	2e-87	71.65	91	TGATCGAAAGACTGTTAAATCCCCTATTAGAGGAACAGTTGATTCTAGCTGAGGTAACGT ATTGTTACTCGCATAACCTCGACCACGACCATAGCCGCGACCTCTTCCCCTGTAGGGGGA TGTCATTCTCCCTGTAAAAATTCGCGAGTTAGGTAATCAGCAAGAGAGTTATTCTCTCCT TTTATGTACTGAATATCAAATTCAAAGGCGGAAAGCTGGGCTTGCCATCCTGCAAAAATT TGTTTTGCTACAAGATTCTTAATATCTTTTTCAATAATTGATTTAGCAGAACTACAATCA ATTCTAAGCAGGAATTTCTGGTTTAATAAATCACCTTGAAATTTAGAAATACATTTTATT ATAGAAAGCATTTCTTTCTTAATAGTCGAGTAT…	XP_028059089.1
83	c146191_g2_i1	1355	307	3.69	Ortervirales	Caulimoviridae	circular dsDNA,RT	Caulimovirus	[Cauliflower mosaic virus]	CaMV	Dwarfed plant	703	158	380	31.72	270.4	2e-71	65.1	76	AAAAAGAAAAAGAAATCTTTTAAACCAGGAAGATTTGTTAGAGAGAAAAATCAATCTTCG GACAAACAAAAGTTTTGCCCTAAAGGTAAAAAGAATTGCATGTGTTGGGTCTGCAACGAA GGACACTATGCAAATGAGTGCCCTAACAGGAAAAAGCATAACGGAAAAGTCCAGATGCTT GAACAAATTTATTCTTTAGGTTTTATTCCTATTGAAGACCCCTGTGAGGATATACAATAG GTATATTCCATTGAAGAATTAGATCATGGACCAGAAGATTCAGATTCTAATGATTCATCT TCCTTAGAGTCATACTGAAGAAGTAGAAGAATTGGTAATGCCCAACATTACTAACCCTAA TTCTATTTATATTTCTGGTAAATTAAAATTTGC…	BCW03861.1
84	c143025_g5_i1	1187	319	1.51	Ortervirales	Caulimoviridae	circular dsDNA,RT	Caulimovirus	[Cauliflower mosaic virus]	CaMV	Asymptomatic plant	489	109	302	39.67	161	1e-38	43.15	49	ATTAAATCTATCTAACGCTTTTTGTCCTACCAAAGGAATTTTAAGAAGGTAGTCTTTAAC GTACTTCTTATACTCGTCTTGGTGAGGGATAAGATATAATTTTTTCTCATAATCACAATA GAATGAATCAAGAAAACATATATCACAAAGTTGCATATTAGCAAGCCTAGTCTTGACTGC ACCAATAGCTTTTCCCTGTTCCTGCAATTTGTCAGTAGTAAGATTAATTCCTAAGAACAT AGTATAGATAGCATCTATAACTTTTTCAAAGGCTGTGACGGGACTCATAATGGGTGCCCA TCCTGTGTTTTTAATAAAATTATTAACAACACCTGTAGATTTATGCTCCATTAACAAAAG AACTGTATTCTGATCGTTCTAAGCATCTTTGTT…	AGT42181.1
85	c146333_g3_i1	1168	129	1.85	Ortervirales	Caulimoviridae	circular dsDNA,RT	Caulimovirus	[Cauliflower mosaic virus]	CaMV	Dwarfed plant	696	109	307	28.59	241.5	7e-63	61.46	74	CTCTACTAAGAATGCTGGTGACTGATGAGGTGATTTACTGGGAATGATGATCTTCATTTC CAGGAGCTCTCGAATTTGTTTACCAAATTCTTCTCGATCTTGAGGACTGTACTTCATTGG TTTTACCCTGACTACTGTCTTAGGATCTCTGAGTTTGATTGATGCCTTCATCCAATGTTT GGTCTTTGCGGGATCCAGAGGATTGTCTGAGCATACTGAATCTAATAATTCTTCGATATT AGATTTCTTTGCTAAGTTAAGAACTAAATTATTGCAAATAAAATTTAATTCTCTAAATTT CTTTATACTATCTCTCCCCCTCTCTAAAATAAAACTTTTATTTGGGCTGATGTTGATAGC ATCTGGCTGTTGAATCTTTGATCTTTTCTTCAT…	BCW03861.1
86	c141697_g5_i2	820	56	1.26	Ortervirales	Caulimoviridae	circular dsDNA,RT	Caulimovirus	[Cauliflower mosaic virus]	CaMV	Dwarfed plant	679	1	150	22.09	195.3	4e-49	63.4	55	TTAGGATTTGCTCAAAAAATAGTTAAAGAAGAAATCGGCAAGATTTGTGACTTAACTAGA CAACAAAAACAATTAAAATCTTTTAACAAAAATTGTTGTAAGACTTTAGTTGAACAGCCA TTTGAATATGGATGTAGACCTTCAAATAGGAAAGACAAAAAAAACAATTAAAAATGATGC TTGAAGAAGTTTCTTCTCTTAGATATTTGCCAATCGAGGATCCCTATGAAAGTGAACTTG AGGTTTACTTAATTGAAGAATTGGACCCCGGACCTAAGGAATCCGAATCTGATGAATCAA CCTCTTCTGAAGCAGATTGAGGAAGGAGAAATAATGATGACCAACATCACTAATCCAAAT TCTATTTATATCAAAGGTAAACTCAAATTTGTC…	AKL90390.1
87	c140465_g3_i1	472	50	2.59	Ortervirales	Caulimoviridae	circular dsDNA,RT	Caulimovirus	[Cauliflower mosaic virus]	CaMV	Dwarfed plant	520	1	83	15.96	55.8	2e-07	44.58	43	GGATTTTTAGCAAATCCACAGCTATCAACGGATTTGTTGATTCTTTACCTGGAGCCGTTT TCTCAGGAATAGCCTCTACTTGACATGTTTCCATGGAAGGTGTAGAAATAACCTTTTGCT GTTTACTCTTCTCGAGAGTTACATATTCGATCCCGATCCTTACGAGCTCGAGTTTTTTCA TGAGAATAGTCTCTTGTAACTTTAAAAGGTCGTACTCATCCATTAAGGGATGATCCTGTA AGTCCAAATAGGACCTGGAAATAATTTTCCTTTAAGAGATGCGAAGCTCTGTTGTAGGTT TTTAAACCTATTTCTGAATTCTTAAGAGAATTCTCGTAGTGAGTATTACTGATTAGAGAA GGGATATGAAAGTTTTGGTGTGCCTTCATTGTT…	AGT42162.1
88	c134699_g1_i1	425	31	1.94	Ortervirales	Caulimoviridae	circular dsDNA,RT	Caulimovirus	[Cauliflower mosaic virus]	CaMV	Dwarfed plant	498	39	177	27.91	58.9	2e-08	35.71	67	CTTTGATAGTTTGAATGATCAAACTAATTTCTCTGGCCCAATTGTCAATGAGCTCTTTCC TGTTTGTCTTACAATCAATGTTAAGATTATTACTACCAAAAGCATTAGTAGTAGTTTTTG CTGTTTCAGCATTAAAAGGATAAAAATCACCTTTTCTCTTCCGACTACCATCAGATTTTT TACCTGATTCGTCATCCTTCTTTGTTTCTGAAGTTTCTCCTATTTCCTTTTTGGAATCAG GATTCGATTGTCTGTCCATTCTGAATGACTCTGGATGGAGTTCTTCATCTGAACTGAAAC TTTTAATAACATGTAATTTCTCACATTCATTAAAATCTTCTTCACAATTATTAAAATCCC ATAAGGACTTTAGATAATCACTTGCGTCTATTT…	AGT42090.1
89	c139044_g1_i1	374	34	0.93	Ortervirales	Caulimoviridae	circular dsDNA,RT	Caulimovirus	[Cauliflower mosaic virus]	CaMV	Asymptomatic plant	680	1	99	14.56	141.7	1e-30	65.35	80	CGAGGATCCCTATGAAGTAAACTTGAGGTTTACTTAATTGAAGAATTGGACCCCGGACCTAAGGAATCCGAATCTGATGAATCAACCTCTTCTGAAGCAGATTGAGGAAGGAGAAATAATGATGACCAACATCACTAATCCAAATTCTATTTATATCAAAGGTAAACTCAAATTTTCCGGTTATAAACAGATAGAATTACATTGTTATATTGATACAGGTGCAAGCTTGTGTATAGCAAGTAAATATGTTATCCCTGAAGAACATTGGGTTAAAGCAGAAAGACCTTTACATGTATTAATTGCCAATGGCAGTGCTATGACAATTAACAAGGTTTGTAAAAATCTTGATATAATGATAGCATGAGAAATATTTC	AKL90390.1
90	c139044_g1_i1	374	34	0.93	Ortervirales	Caulimoviridae	circular dsDNA,RT	Caulimovirus	[Cauliflower mosaic virus]	CaMV	Asymptomatic plant	680	1	99	14.56	141.7	1e-30	65.35	80	CGAGGATCCCTATGAAGTAAACTTGAGGTTTACTTAATTGAAGAATTGGACCCCGGACCTAAGGAATCCGAATCTGATGAATCAACCTCTTCTGAAGCAGATTGAGGAAGGAGAAATAATGATGACCAACATCACTAATCCAAATTCTATTTATATCAAAGGTAAACTCAAATTTTCCGGTTATAAACAGATAGAATTACATTGTTATATTGATACAGGTGCAAGCTTGTGTATAGCAAGTAAATATGTTATCCCTGAAGAACATTGGGTTAAAGCAGAAAGACCTTTACATGTATTAATTGCCAATGGCAGTGCTATGACAATTAACAAGGTTTGTAAAAATCTTGATATAATGATAGCATGAGAAATATTTC	AKL90390.1
91	c141697_g4_i1	223	5	1.71	Ortervirales	Caulimoviridae	circular dsDNA,RT	Caulimovirus	[Cauliflower mosaic virus]	CaMV	Dwarfed plant	514	119	185	13.04	72	1e-12	51.35	96	GTCGGATGCGACTCTTGCTTCTTGAAGGCTTTTGTATTTCTTGTGTGTAACACCAGAAAT TCCAGATACCGCAAGACTTGCTATTGACCCGTTGTTGTAAATGCCTGGATTTGGACCATT GAAAACAACATAGTAATTTTTTGGATTTTGAATATCCAATTGACTGTTAGGTCTTACTAA TGATTGCTCATTAGATTTGTTTGGGATTGAAATTCCCCCATTG	AAZ95267.1
92	c110213_g1_i1	221	0	0	Ortervirales	Caulimoviridae	circular dsDNA,RT	Caulimovirus	[Cauliflower mosaic virus]	CaMV	Asymptomatic plant	659	89	140	7.89	63.2	7e-10	60.38	70	AATGGTCCAAATCCAGGCATTTACAACAACTGGTCAATAGCAAGTCTTGTGGTATCTGGA ATCTTGGTGAGCTGCTGTTACTTTACTGATGTACAATTCCTTTTCTGCATGGGTTAGTAT AATCATTCTTGCAAACTGAGTAAATGGTGTATATAACTGACAAAAATTATTGCCTAATAT GATATCCATACCAGATTCTTGCTGATATACGGTTGGAATAT	BCW03861.1
93	c9877_g1_i1	206	0	0	Ortervirales	Caulimoviridae	circular dsDNA,RT	Caulimovirus	[Cauliflower mosaic virus]	CaMV	Asymptomatic plant	520	7	83	14.81	55.1	2e-07	48.05	90	GGATTTTTAGCAAATCCACAGCTATCAACGGATTTGTTGATTCTTTACCTGGAGCCGTTT GCTCAGGAATAGCCTCTACTTGACATGTTTCCATGGAAGGTGTAGAAATAACCTTTTGCT GTTTACTCTTCTCGAGAGTTACATATTCGATCCCGATCCTTACGAGCTCGAGTTTTTTCA TGAGAATAGTCTCTTGTAACTTTAAA	AGT42162.1
94	c118536_g1_i1	343	147	4.85	Sobelivirales	Solemoviridae	ssRNA(+)	Polerovirus	[Cnidium polerovirus 1 ]	CnPV1	Asymptomatic plant	1045	385	444	5.74	76.6	9e-14	91	99	TGACAATTTTAATCTCATGGCTCCTATTCCAAACATTCCCGGACTCACTAGCTCTAAGCT AGTTTTCGAGACATCTGCGCCCCAAGGTAAAATCTTTGATGATTGGGCGAAGATCCAGGA GGAATATGAAGAGCTTTTGGAAGACCTTTCTGGAACAGAGGCTATCAGCGTCATGAAGAA AAGGCGCCCTGAGCTCTTTAGGGATGAATTAAAATCCCTGGTGGTAGCCCTGAAAGGGGA ATTCACACCTGTTGATGCTTTGATCGCCAATAATTTCATGGAGAAGTGTGCTGAAATAAT AGACACTGACCATGAGCGTATTGAGCTCAACTATATTCCAAAC	WBK70954.1
95	c146814_g1_i1	6094	119113	279.73	Sobelivirales	Solemoviridae	ssRNA(+)	Polerovirus	[Cnidium polerovirus 1]	CnPV1	Dwarfed plant	1045	531	1044	49.19	733.8	2e-210	96.75	37	GAAGAAAATTTGCTTTATGCTCACGCTTTTACACAACGGAGCCTTGACATACAACACTAA AGTCGATAAAGCATTCCGAGAGCCTCTAGACCTCCTTTTCTGGTCTATATTTTTAGTGAA TAACTACTATGGCCTCCATGGATTTGATCATGCCACAAATCCTATTTTTCTTTCTTCTCT GCACTTTTTGCTACCCGTCCATTGCAACAGACAATTTCATATTAAAACTGGACGGGTTGT CTTCAAGAAACGCTTCCTACGAAGCGTTCTCTACTGGGGTCTCCACACCCGCCACACTCC CCATTTTCTCATTCGAGGAGATAGGGTTGAGTTACATCTTACCACCTCCGCCCCCCCAAG CTCTTACAGAGACTTCTTATGGGGACTTGAGCA…	WBK70954.1
96	c144986_g1_i1	6067	459506	364.68	Sobelivirales	Solemoviridae	ssRNA(+)	Polerovirus	[Cnidium polerovirus 1]	CnPV1	Asymptomatic plant	1045	544	1044	47.94	731.9	9e-210	97.91	37	CGAAGAAGAAAATTGCTTTATGCTAACGTTGCTACATAACGGAGCCTTGACTTACAACAA CAAAGTCGATAAAGCATTTAGAGAGCCTCTAGACCTCCTTTTCTGGTCTACCTTCTTAGT GAACAACTACTACGAGCTCCATGGGTTTGATCATGCCACAAATCCTATTTTTCTTTCTTC TCTGCACTTTCTGCTACCCGTCCATTGCAACCGAAAATTTCATATTAAAGCTGGACGGGT TGTCTTCAAGAAATGCCTCTTACGAGGCATTCTCTACTGGGGTCTCCACACCCGCCATAC TCCCCATTTTCTCATTCGAGGAGATAGGGTTGAGTTACACCTTACCACCTCCGCCCCCCC AAGCTCTTACAGAGACTTCTTATGGGGACTTGA…	WBK70954.1
97	c146747_g1_i1	6914	204504	421.56	Picornavirales	Secoviridae	ssRNA(+)	Unassigned	[Cnidium vein yellowing virus 1]	CnVYV-1	Dwarfed plant	2227	1	2227	100	3770.7	0	99.37	95	TGCGAACTTTGTCACTATTTGTTTCCTCAACTAGTTATTGGACTTATCCAATTCCCTTCG TTTTCGCACTTACTAGCACCGGGCTTATCCGGATTCTCTCTTTGTTTTCTTTTGTTGTAC TGTGGTCATACAGTTTTCCTTTTGGAATTCAAGTCTTAACTTGAACAACAACTTTTCTCT TTGTTATTTCTCTTCTCTAGTAACCACTTTAATTTTCTATGGGTTACTCAAGAGGTTCTC GCGGTAAGGCTGACAAAGCCAAGCTGTGCGGCATCTGCTTTGCCCCTTTTCCTGATGCTC AGGAAAGAAAGGTCCACTATCGAAAATATAACTGCCGTGACTCGTCCGGTCAGTTGGGTG GGCTGGTTAGCACAGGGCGCTGTGCTGGGATGA…	AKN59243.1
98	c144869_g1_i1	6913	145930	101.21	Picornavirales	Secoviridae	ssRNA(+)	Unassigned	[Cnidium vein yellowing virus 1]	CnVYV-1	Asymptomatic plant	2227	1	2227	100	3771.5	0	99.46	95	GCGAACTTTGTTACTATTTGTTTCCTCAACTAGTTATTGGACTTATCCAATTCCCTTTGT TTTCGCACTTACTAGCACCGGGCTTATCCGGATTCTCTCTTTGTTTTCTTTTGTTGTACT GTGGTCATACAGTTTTCCTTTTGGAATTCAAGTCTTAACTTGAACAACAACTTTTCTCTT TGTTATTTCTCTTCTCTAGTAACCACTTTAATTTTCTATGGGTTACTCAAGAGGTTCTCG CGGTAAGGCTGACAAAGCCAAGCTGTGCGGCATCTGCTTTGCCCCTTTTCCTGATGCTCA GGAAAGAAAGGTCCACTATCGAAAATATAACTGCCGTGACTCGTCCGGTCAGTTGGGTGG GCTGGTTAGCACAGGGCGCTGTGCTGGGATGAA…	AKN59243.1
99	c144251_g2_i1	1476	88	0.32	Picornavirales	Secoviridae	ssRNA(+)	Unassigned	[Cnidium vein yellowing virus 1]	CnVYV-1	Asymptomatic plant	2227	1871	2227	16.03	661.4	4e-189	99.72	72	GCCAGAACTAAACCCGGTAAGACCTGGGAGGATGCCTGGTTAATCCTTTATTTAAACACA AAAGAAAGCAAAGAGCTTAACAACTACATACATCCAACGAAGGAAGAGATAGAAGGCTCC AAAGAAAACACACAAAGCAGATTGGCATGACAAAAGTGTACAGCTCAATGAAGAGCTAAC ACAACAAGGCCCTATACTAAAAGTAAAAAGCTAAACTATGTTTTTGTCCATACTTGGGCT TCGGTTCAAAGACCTTTGACCCTCAGGATATGACAGAAAAGTAAAACAACCATGTAGATC CATGGTAGTGACACACAAAGTTCACCGGCTTGCCTGATTAGTGCCCGTCTGGGCCAGGGA TATTCTCCAGGAGAAATGCCTAAGAAAAAAGGG…	BBG58106.1
100	c115433_g1_i1	216	1576	210.86	Picornavirales	Secoviridae	ssRNA(+)	Unassigned	[Cnidium vein yellowing virus 2	CnVYV-2	Asymptomatic plant	3067	6.87	400	1e-107	216/216	100	100	100	GAAGCCCAAGTATGGACAAAAACAGAGTGTTTAATTTATGCATTTAGGTTAGGGCCTTTGTGTGTTAGCTCTTCGTTGAGCTGTATGCACTTAGTTATGCCACCCTGCTTTTGTGTGTTTTCTTTGAGCCTTCTATGTCTTCTTTGAGTGGATGTACGTAGTTGTTATGCTCCTTGCTTTCTTTTGCGTTTTAATAAAGGATTAACCAGGCATCCT	LC424759.1
101	c146586_g1_i1	2530	24525	145.89	Picornavirales	Secoviridae	ssRNA(+)	Unassigned	[Cnidium vein yellowing virus 2]	CnVYV-2	Dwarfed plant	989	4	989	99.7	952.6	1e-276	97.2	93	CTTTCTTTGGCAGACGCTCAACACAAGAGATGCCAAATGTTCCTTCATATTCCCCTGAGG AAATGGAAGTTCTGAAGGCTGCCATCACTGAATATGGAATTAGTTATGTTGATGTGGTGA GAGCAGCTCAAACTGAAAGTGGAAAGATGGCAATTCTTTCTGCAGTAAACACAAATCAAC TGGAAAGTCTAGTAGCAACTACTGCTACTAGCAACTCCTTGATGTGTTCGCGTGAGAAGC CTGAAACCACCGTCCATGTTTCTGAGGGTGTGGGACGACAGGTTCTTTGTGATGATGTCC CTGCTTTTGAGGAGGATCAGGCACAGATTGGAGAGGCTAGAGCCTCTTTCCCTTTTGCAA GTGCTTCTTATGGACAGCAGGATGAAGTGGCCC…	AKN59246.1
102	c140393_g1_i1	2265	292	1.96	Picornavirales	Secoviridae	ssRNA(+)	Unassigned	[Cnidium vein yellowing virus 2]	CnVYV-2	Dwarfed plant	2227	1486	2227	33.32	1383.6	0	99.87	98	TCTCCAAGAGAAATGCCTAAGAAATAAGGGGTGAATTACCAGCCTTTCGCTGCTATGGTT GATTCCAAGAGACCAGCATCATTGTCTCCAAAGTACGCTTTCATGTATGCCGAATGATGA AAAGATTCACGATACATAGAGGCATAAAAAGCTGCGACCCAATGGACCAGGGATTGATTT ATAGCTCCAGTGAAATAAACCTTGTCCCCGCGCTGATGAACTTTTTTTAAAAAGTTACGA ATTGTACTGCGAAGCGGGTATTTTGAACCCTGAGGAGCTTGAATCTGGAAACAGGTGCTA GCATTCTTAAGCTGGTTAGGGCAATTTGGTCCGCACCAGACTACATTTGGAACCTCATCA GACCTCCACTTGAGACATTGTTGAACTGGAATG…	AKN59245.1
103	c144403_g2_i1	1979	18612	48.81	Picornavirales	Secoviridae	ssRNA(+)	Unassigned	[Cnidium vein yellowing virus 2]	CnVYV-2	Asymptomatic plant	2227	1633	2227	26.72	1124.8	0	99.66	90	TAAAGCTGTTGCTGCGGACATGAGTCCAGTTACCGAGGACGAGGAGAAGATATGGAATCT CACCTGGGACAGTATCTTTGACCTTCCTGGCGGGATTGCCAGCAAGTGTCACCTGCTGTC AGAAGACGAAAACTTGAATGGTGTCAATGGAGATAATGAATATCGTGGAATGGTTGTTAC CACGAGTGAGGGCTGGCCGGAGGTCCTGAATCGGAAGAACGGTGAGGCGGGCAAGGAGAG GTTCCTATTGGGCTTACCAGGGTGCTACACCCTTAACCGAGACTTGCCCATGTACCAGAG GATAGTGGATATGGATGAGTTGTGCAAGACTACTATACCCTGCATTGTTGGCTTAGATAC TGCAAAGGATGAACGCCTCCCTCTTTCTAAGAT…	AKN59245.1
104	c136700_g1_i1	1945	20956	56.03	Picornavirales	Secoviridae	ssRNA(+)	Unassigned	[Cnidium vein yellowing virus 2]	CnVYV-2	Asymptomatic plant	2227	229	893	29.86	1058.5	0	99.54	99	TCCTTTAACCTCTGGTGACTTTAATGTGATGATGCGAGCTCTTTCTGATGAGTGGGTCGA GTGGTGTTATTTTGAGGAGGATTATGAAGAAGCCCTTACTGAGGGGTTTGAACTCTTCTT TTCTCCTCGTAATGGTGTGGAAACTTTGAAGTCTTCACTTGGCTCTGGACCCTCGAGTCC TACATGCGTCCTGGATTCTGCTGACTCCTATCTCTCTGGGACCAAATGGGTTTACGATTC TGATGAGGAAGAGTATGTCCCCGTAGCTCCAGTTGACCAATTTCATAATAAGAAATTCAA CTTGGACTTTATTGATTATTGCGATCTGGAGTATATTGAGCAACCTGTTGGGAGTCTCCG CACAGAGACGTGGTTTATTGATGGTTGCCTTCC…	AKN59245.1
105	c143083_g1_i1	1945	27929	222.01	Picornavirales	Secoviridae	ssRNA(+)	Unassigned	[Cnidium vein yellowing virus 2]	CnVYV-2	Dwarfed plant	2227	229	893	29.86	1062	0	99.38	99	TCCTTTAACCTCTGGTGACTTTAATGTGATGATGCGGGCTCTTTCTGATGAGTGGGTCGA GTGGTGTTATTTTGAGGAGGATTATGAAGAAGCTCTTACTGAGGGGTTTGAACTCTTCTT TTCTCCTCATAATGGTGTGGAAACTTTGAAGTCTTCACTTGGCTCTGGACCCTTGAGTCC CACATGCGTCCTGGATTCTGCTGACTCCTATCTCTCTGGGACCAAATGGGTTTACGATTC TGATGAGGAAGAGTATGTCCCCGTAGCTCCAGTTGACCAATTTCATAATAAGAAATTCAA CTTGGACTTTATTGATTATTGCGATCTGGAGTATATTGAGCAACCTGTTGGGAGTCTCCG CACAGAGACGTGGTTTATTGATGGTTGCCTCCC…	AKN59245.1
106	c146325_g1_i1	1924	195	1.57	Picornavirales	Secoviridae	ssRNA(+)	Unassigned	[Cnidium vein yellowing virus 2]	CnVYV-2	Dwarfed plant	989	656	989	33.77	423.7	2e-117	99.41	79	AGGATGCCTGGTTAATCCTTTATTAAAACGCAAAAGAAAGCAAGGAGCATAACAACTACG TACATCCACTCAAAGAAGACATAGAAGGCTCAAAGAAAACACACAAAAGCAGGGTGGCAT AACTAAGTGCATACAGCTCAACGAAGAGCTAACACACAAAGGCCCTAACCTAAATGCATA AATTAAACACTCTATTTTTGTCCATACTTGGGCTTCGATTCAAAGATCTTTGACCCTCAG GATATAACAGAAACGTAAATAAAACCATGTAGATCCATGGTAGCAACACACAAGGTTTGC CGGCTTGCCTGGTCAATACCCATCCGGGCCAGGGATATTCTCCAAGAGAAATGCCTAAGA AAAAGATACACTCAACCGACCACAAAAGTGTTT…	BBG58107.1
107	c143981_g2_i1	1497	13456	48.45	Picornavirales	Secoviridae	ssRNA(+)	Unassigned	[Cnidium vein yellowing virus 2]	CnVYV-2	Asymptomatic plant	989	507	989	48.84	610.5	8e-174	99.18	97	CCGCAGGCTTTTGTGACATGGATATGGATGTTAATGGAGCTTTTAAAGTGGTGATTATTA AAGATCTAGCCAACTTTGATGTTTCTGATTATGGTATGGAGCTCTCAATGTACTTAGAGG TTGAGAAGATTGGCTTGGGTGGCATCACTGTGGATGAGAGATTAACAACTTTTTATCCAC TTCGGCAGGTTGTTCTGGATTATGAGCTTACTACAACTACTGCAAAAGGGAAGGCTTTAG TTCTTCCCCTCAATCCTCTATTGCCAGCTCATGATGGCGCTCAATTTTACCCAAGCTGCT CTTCTTCCATTTTGGAGAATCATCGGTACTGGAAAGGAACTCTCTCATTGGAGGTTGTTT TCAACCTTCCCGCCATGGCAGGTGGTATTGCTG…	BBG58107.1
108	c136700_g2_i1	1333	11981	49.41	Picornavirales	Secoviridae	ssRNA(+)	Unassigned	[Cnidium vein yellowing virus 2]	CnVYV-2	Asymptomatic plant	2227	891	1334	19.94	796.6	7e-230	99.77	99	ATCGGTGTGTTCTCAGTACCTTATAGATGATCTCCTGGATTCGCTAGATTACGCCCAAAC TGGTAGAGTTTTCTCTCGGAATGGCTCTGATTCTTTTTGGTCATGTTATAAGAACCAAAG TGCTGTTTTGTACGATGATTTTGGTGCTGTCTCTGAGGGTGGTCACTTTGATGAAGCTGA GATAATAAGGTTGATTGCGCCTGCACCCTTACCTCTAAATATGCCAAATCTAGAAGCAAA GGGGAACACATGCTGCACATCTGATTTTGTGTTTATAACCGCCAATCAAGCAGGTTTGAC ACCAAGTGCTGTGGTTCACTGCAAGAAGGCCTTTGAGAATCGAAGATTGATCCTGGCTGA AGTTACAGCTGTTGAAGGGGGTAGGTATCGTGA…	AKN59245.1
109	c139547_g1_i1	1002	16	0.09	Picornavirales	Secoviridae	ssRNA(+)	Unassigned	[Cnidium vein yellowing virus 2]	CnVYV-2	Asymptomatic plant	989	721	989	27.2	326.6	1e-88	99.63	81	GTTTTTGTCCATACTTGGGCTTCGATTCAAAGATCTTTGACCCTCAGGATATAACAGAAA CATAAATAAAACCATGTAGATCCATGGTAGCAACACACAAGGTTTGCCGGCTTGCCTGGT CAATACCCATCCGGGCTAGGGATATTCTCCAAGAGAAATGCCTAAGAAAAAGATACACTC AACCGACCACAAAAGTGTTTTCAAAGAAATACTTAGGTGCAGGTGACGGATCTGGAATGA TCAACGGAAAACCGCCCATAGGGTGTCTATACTCGATGTTGGGCTCAACCCAGAGGGAAA CATCTCTTACATGTAATTGTGTCATTGTTTTGGGCGGAAACTGCAACAACACCCAAACGG GACAAGTGCGCCAGGTGTACTGCTCCGTAGCTC…	BBG58107.1
110	c137073_g3_i1	955	11042	203.69	Picornavirales	Secoviridae	ssRNA(+)	Unassigned	[Cnidium vein yellowing virus 2]	CnVYV-2	Dwarfed plant	2227	1017	1334	14.28	543.9	6e-154	100	99	GGGTAGGTATCGTGATAGGTATCGCTTCACTTTACATCAAAAAAATGAACCTTACTCACG AGATGACCGATTTCAAGTTATGAACTATGAGCAGTTCCTTCAGTATGCTGTTAATCAATC AAAGCAGCATTTTTCCGAGCAAGTTGATCTCCGTGATGCACCCCATACGCAAATTTTTTC CGCAGCAGATCAGATAGCAGCAGAGGCAGAAGAGGGTTTCCAAACAGCAGGTATTAAAAT ACCATTCTGTATGCTCAAGAGCTTGTCAGGAGATCAACTCACCTACTATTCTGAGGAAAA AATGATGGAGGTGACAGAGACATTGGCACCGGAAGATGCGGACATAATTCGTTCGCGTCT TGATCCTGGGATGATAACTCAACAGTTGCAAGC…	AKN59245.1
111	c143315_g1_i1	911	13114	86.41	Picornavirales	Secoviridae	ssRNA(+)	Unassigned	[Cnidium vein yellowing virus 2]	CnVYV-2	Asymptomatic plant	989	8	512	51.06	352.8	2e-96	98.35	99	GACGCTCAACACAAGAGATGCCAAGTGTTCCTTCATATTCCCCTGAGGAAATGGAAGTTC TGAAGGCTGCCATCACTGAATATGGAATTAGTTATGTTGATGTGGTGAGAGCAGCTCAAA CTGAAAGTGGCAAGATGGCAATTCTTACTGCAGTAAACACGAACCAACTGGAAAGTCTAG TAGCAACTACTGCTACTAGCAACTCCTCGGTGTGTTTGCGTGAGAAGCCTGAAGCCACCG TCCATGTTTCTGAGGGTGTGGGACGACAGGTTCTTTGTGATGATGTCCCTGCTTTTGAGG AGGATCAGGCACAAAGTGGAGAGGCTAGAGCCTCTTTCTCCTTTGCAAATGCCTCTTATG GACAGCAGGATAGAGTGGCCCTCCCCAGCCTAC…	BBG58107.1
112	c146720_g1_i3	786	71	1.69	Picornavirales	Secoviridae	ssRNA(+)	Unassigned	[Cnidium vein yellowing virus 2]	CnVYV-2	Dwarfed plant	989	3	101	10.01	147.1	1e-34	94.02	70	GGAGCCACTCGTGTGCTGAGCACAGAGGCAGCCAACTTTATTGTGAAATTGGCACTCCTG GGGAGGTAGGCTGGGGAGGGCCACTTCATCCTGCTGTCCATAAGAAGCACTTGCAAAAGG GAAAGAGGCTCTAGCCTCTCCAATCTGTGCCTGATCCTCCTCAAAAGCAGGGACATCATC ACAAAGAACCTGTCGTCCCACACCCTCAGAAACATGGACGGTGGCTTCAGGCTTCTCATG CAAACACACCAAGGAGTTGCTAGTAGCAGTAGTTGCTACTAGACTTTCCAGTTGGTTCGT GTTTACTGCAGTAAGAATTGCCATCTTTCCACTTTCAGTTTGAGCTGCTCTCACCACGTC AACATAACTAATTCCATATTCAGTGATGGCAGC…	BBG58107.1
113	c144403_g3_i1	372	15	0.41	Picornavirales	Secoviridae	ssRNA(+)	Unassigned	[Cnidium vein yellowing virus 2]	CnVYV-2	Asymptomatic plant	989	3	101	10.01	144.1	5e-34	96.75	99	TCCTCAAGAGCAGGGACATCATCACAAAGAACCTGTCGTCCCACACCCTCAGAAACATGG ACGGTGGCTTCAGGCTTCTCACGCAAACACACCGAGGAGTTGCTAGTAGCAGTAGTTGCT ACTAGACTTTCCAGTCGGTTCGTGTTTACTGCAGTAAGAATTGCCATCTTGCCACTTTCA GTTTGAGCTGCTCTCACCACATCAACATAACTAATTCCATATTCAGTGATGGCAGCCTTC AGAACTTCCATTTCCTCAGGGGAATATGAAGGAACATTTGGCATCTCTTGTGTTGAGTGT CTGCCAAAGAAAGACATGTTAGAAATCAAAGGGGGGAGAACTATATAACAGAGGAGCAGA AAGAAAAGGAAA	BBG58107.1
114	c12862_g1_i1	238	9	0.84	Picornavirales	Secoviridae	ssRNA(+)	Unassigned	[Cnidium vein yellowing virus 2]	CnVYV-2	Asymptomatic plant	2227	1550	1628	3.55	133.3	6e-31	100	99	GCCCTTCTTAAATATATCTAAGTGCCGATCATGGAGACGAGTATCTCTATTGTGGATAAT AGCTGGCTCGGTCTTCCTTTTCTCCCCAGTTAGCATCTCAAGATCCGCTGAAATGGAACT CTTCTTAATCTCACTGGATGTGGCTTGTCTCGGGGCATCTGACGGTTGTAGGAGGCCTTC TGGAAAGACAGTTTCAGCGTCAAAAAATTCCTCACCACTCAGACAACCAGAGGCTTGA	AKN59245.1
115	c145008_g1_i1	8725	11698	6.39	Mononegavirales	Rhabdoviridae	ssRNA (-)	Betanucleorhabdovirus	[Cnidium virus 1]	CnV1	Asymptomatic plant	2106	5	2037	96.53	1902.1	0	99.32	70	TATCTCTGAGCGAACCAGATTTTTATGCATTTGTGTGCATAGCATTGTCTGTTCGTCATC CCGTCCAAAGATCAACCGCAATGTTAGCATTGACATATCCTGCTAATATCCTGTGTTCGG ATTATGCCAGTGCAGCACCAACCCCATCTCGAGTGGTCCCTTTTACAGTTGTACAACAGG TGGGGAAGACCTTGAGCATAGTCCCTGGGAAGAATACCGCACAAGATCCCCAGACATTAG AAGAGTCAGCAGCAGAGCAAGCTGACGCGATATGCTTCTACTTTGCGTGGATGACACGGT TTTCTGTGAAAACTCCATCAGCAGCTTTGCCGATACAAATGGACAAGCTGAGAGAGACAT ATCTGAAATTCTACCAAAAATCATCTGGTATAT…	UGY70985.1
116	c146815_g1_i1	8371	12495	21.16	Mononegavirales	Rhabdoviridae	ssRNA (-)	Betanucleorhabdovirus	[Cnidium virus 1]	CnV1	Dwarfed plant	2106	5	2014	95.44	1872.1	0	99.11	72	TATATATATATATATATATATAAGAAAAACCAACACACGAATGATAAATCCACAGTAATC AGCACTGTGATATATCATACACACATTCGCCCGATAATATGGCCTCATTCAGGAGGACAT GCAAGACCTTCCATGTTTATTTTATTGTGCTAATTATTGTTGCTCTTTTACAGGCAGTGA AAATAGAATCCGACACTCAGAAGCAGGATAAATTTGAATGGAAAAGACAATCCGCCAAGC AACACAACCCCACATATCAGTCGACGTCTGAGAGAGGGTATGGGGGTGATCTGTACCAAC CATATTATGTGTGTGATAAAAACAACGACACAGATAGCATGACATCATCAGCCTGGTATT ATTCGTGCAAGCAGTCTTGTACAGAAGCAAACA…	UGY70985.1
117	c146758_g1_i1	5175	35948	100.03	Mononegavirales	Rhabdoviridae	ssRNA (-)	Betanucleorhabdovirus	[Cnidium virus 1]	CnV1	Dwarfed plant	450	1	446	99.11	486.9	3e-133	100	26	ATATATATATATATATATATAGAGAGGGATGGATAGTTGAGATTGCGGGAGGGGTGAACTTGGAGAAGGATAAGAAGGAGATGTTCGGAGATTTTATTATGCTTATAATACCGTACTTAATCATGTAAGCATTGTCATCAGTACTATTGATGTTGATATCTTATTTTGCCGGGGCTGATGTTAATGGAATGTGGTTGGCTTCCCCCTCTTGGTCTGTTTCAACGGGAGATGGTGTTTCTGGAGCGGGTAAGATGTTCTTCATCTTTCTCATAGATGCATGTCTTATGATATCTCTTAAGTGCCTCTTTTTCTTGATTATACGTCTGAGAGCAGATTTCCTCTTCGACGGGGGCGGGGTGTCGTCACCTGACTGCTCGGATGTCCATTCGGATTCCGACC…	UGY70979.1
118	c145001_g1_i1	1744	3821	11.55	Mononegavirales	Rhabdoviridae	ssRNA (-)	Betanucleorhabdovirus	[Cnidium virus 1]	CnV1	Asymptomatic plant	630	3	529	83.65	521.5	5e-147	97.81	94	CCTTTCCCCATCTCGTCAAAAAGGTAGTTTCTTATGGACAGGCTTTTCTTTTCTTTGTAT GATATATCGGACATGATGTTGGTAAAGGCCTGTGTCAATAGAGCACTGATATCATCTTTT GTATGCAACATGATTTTGTCCAATTTGACCTTTGAAAACCAACTAGGGTTTGCTCTGATC ATTTTTGCTGCATTCTTCCATACTGGTGTTGTATAAGGCGGGCTCATTTCTAATATATTA CCTGTCCAAAATTGTACAGTGATGTTCTCTCCTCTTGCTATTTTACCCTTGTACGTGTTC TTATCGTCTATGTCTGTACCCTCTACTGTGCTGCATAGATCATCCATCACTATGTAATCT TTCATTGTGTCCCAACTTGTAGTATGTTGGGTT…	UGY70984.1
119	c144039_g1_i3	1132	577	2.9	Mononegavirales	Rhabdoviridae	ssRNA (-)	Betanucleorhabdovirus	[Cnidium virus 1]	CnV1	Asymptomatic plant	321	1	267	83.18	181.4	9e-45	87.58	83	CAATCGAGAGAAGCAAAATCAGGTGAGATCATTGTTAGTATTCCTTTAATAACGAATAAT TTCAGGACATGGCTAAAGGACCGAATAAGACTGCATTAGCTGAGGAGTACATATCAGCGC CTACAAAATATGTCGCATTCCAGGCTACTCCCATCAGAGGTGAAACTACTGATATCGAGA TAAAGACGGACCATTTTCTGTTCTCGACTCGGGCCCTGTTGTATTTGAAGAACAAGCTGT CATTGGGGGCTCTTGAGATGAACATCCAAAAGATCATTATATCGTGGTGTCCATTGATAG AACCTGGAGCATTATCCTCTATCAAGATATCCGTATCCTACAGTATGGCCAGTGAAATAC AAGAACAAAGGGACAACACTACAATTGTACAAC…	UGY70983.1
120	c140373_g1_i1	795	3028	23.87	Mononegavirales	Rhabdoviridae	ssRNA (-)	Betanucleorhabdovirus	[Cnidium virus 1]	CnV1	Asymptomatic plant	2106	2001	2106	5.03	63.2	2e-09	77.36	56	AAACACACCATAACTTAGATACTCGGATTGTGTGGACTATCGTATACGATGTCTCATATC CAACGGGGCCGGACCGATATCCGAGCAACCTGTTAATTCAGGCGACCTCCTTTTGAGAGG AGGTAAACCTCTGGGGTGCTATCGGATTCGTGCAACACAAGAAATAATAGGAAAAGGCTT ATCTTATATTACAATTACCCGGGACATAACTATTTCCTCCGTCCATAAGAAAGACAACCT CCCTCTCATATCCTCGAGCCCATCAGATAGTGACTCACCGAGTGACCCTCTTGTCATATT TACAAAATACCCTTTCGTTGTGTCCACGTTGCATCCTTGATACAATATGACCTCCTTATA TGACCCCGACTGGTACGACATGTGCTAAAATTT…	UGY70985.1
121	c124406_g1_i1	779	256	2.07	Mononegavirales	Rhabdoviridae	ssRNA (-)	Betanucleorhabdovirus	[Cnidium virus 1]	CnV1	Asymptomatic plant	284	1	198	69.72	157.1	1e-37	100	92	CACAATCAATAAATAGACGGGACATCGGGGCGGCTGCCATATATCAGAACTTACAGGTCA TCATGCAGCCCAGCACATTATCCATAAAAGGTCATGCCAGCATCATGTTCTCAAAGAAGA AACCCGATATGGGGTCCACAAAGGTATGGTCTATCATCAAGAAGCTGATAGATACGTATC CTAACAAGATAAGTATTTTGTTTTCAAGTGACAGGAATGAAGTAGGAGCCAAGCAGGATG ACATGTCTGATAACAAGATCAAAGTATTGCCCGATTTGATAGAAGGATGTATCCAGACTA ATAATATCCATGCAGCATGCAGTAAGTCTATATCTCTTGCTCTTGGCGACTGCTATGAGT ACACTGTCCCTTTTGGTGTTCGATCTGAGGATA…	UGY70982.1
122	c144981_g1_i1	5422	26670	23.78	Tymovirales	Alphaflexivirida	ssRNA(+)	Potexvirus	[Cnidium virus X]	CnVX	Asymptomatic plant	1323	123	1315	90.17	1305	0	98.64	65	GAGACTTTGCAAGGTATGATGCCGACACCCTAGTAGATAACCTTTGTCGGATACATACCA GAGTCGCCTACATCAGCGACACTCTTCACTTCCTCAAGCCGGATTTCATACTTGACATAT TCCATAACAATCCGATGCTTGACGTGCTCTATGCCACCATTGTGCTCCCTGTGGAGGCAA TGTACCAGCATAATTCTGTACAGCCCGAGCTATACTCCATCAATTATGCACATGGTGGTT TCCAATACCTCCCAGGAGGTCATGGTGGCGGGGCATACTCTCATGAATTCCCTGATCTAA ACTGGCTCAAATATGGCTATTTCCGCGGCACGGATAAGTATCCAGGCACAGTAGTCACAT GCCAACAATTGGAATCTCTTGGTGCCAATCACC…	QVW10166.1
123	c146838_g1_i1	5420	45277	120.07	Tymovirales	Alphaflexivirida	ssRNA(+)	Potexvirus	[Cnidium virus X]	CnVX	Dwarfed plant	1323	123	1315	90.17	1299.6	0	98.56	65	AGACTTTGCAAGGTATGATGCCGACACCCTAGTAGATAACCTTTGTCGGATACATACCAG AGTCGCCTACATCAGCGACACTCTTCACTTTCTCAAGCCGGAATTCATACTAGATATATT CCATAACAATCCGATGCTTGACGTGCTCTATGCCACCATTGTGCTTCCCGTAGAGGCAAT GTACCAGCATAATTCTGTACAGCCTGAGCTTTACTCCATCAATTATGCACATGGTGGTTT CCAATACCTCCCAGGAGGTCATGGCGGTGGGGCATACTCTCACGAATTCCCTGATCTAAA CTGGCTCAAATATGGCTATTTCCGCGGCACGGATAAGTATCCAGGCACGGTAGTCACATG CCAACAATTGGAATCTCTTGGTGCCAATCACCT…	QVW10166.1
124	c142853_g2_i8	751	15365	389.4	Tymovirales	Alphaflexivirida	ssRNA(+)	Potexvirus	[Cnidium virus X]	CnVX	Dwarfed plant	1504	1	133	8.84	134.4	8e-31	84.96	53	GAATTTATACTAGACATATTCGAAAACCATCCGCACCTACCCACCTACGCATATCCCGAA AATCAAACGGAAATCCCTGAGATCTTCAGATATGTCTCTTGTGCGTGCAGCCCTTGACCG ACTGACCGACGTTAGTGTTAAATCAGCACTCCAAGAAAGTGCTTATACACGAATTTCGGC CACACTACGGCAAGTCCAAATAGTCAATTCTTTCGCAGTACCCGCAGATGCTGCTGACTG CTTAGGAAATTTAGGAATTTGGAAAAATTTTTTAAACGTAGCTGTACATACTCACTCAGC CGCTAAGGCCATGAGAAATAAACTTTTAGAAATTGTAGGTCACAACCTCACTAAGGAGTC TGTGAATTTGCTTTTCCTTAAGAAAAGCAAACT…	QVW10166.1
125	c138882_g1_i1	722	196	5.25	Tymovirales	Alphaflexivirida	ssRNA(+)	Potexvirus	[Cnidium virus X]	CnVX	Dwarfed plant	1323	492	710	16.55	216.1	2e-55	99.54	99	TGGGAGTTTGGCTCGTGATAGATGCTTTGATTGGGATCACCTGTCAGAATTGCTAGTTCA CACTGTGGTTGTGTGGCTAGGTATGCATCTATGTAGCCGGCGGGCAGTTTACCATAATCA TCAAAAATTACAGTTTTTGCAGCCGCCTGGGTTAGAGCTTTTTCCCATGTCTTGAAAGTC ATCCTTGGCATATTCATAACTTTATCTTCCCAATCTTTTCTGAGTTCGACTGTGGGGAGG ACGACGACGCAGTCACGGAACTTCTTACCACTGGCGCGGAGCCAATCTTGGAGAGCTTGG GATTTGCCGGAGCCTCCTGCACCATGGATGACTGTGAGCAAGACCTTCTTCTCCGTGAAT TCACACATCCCAGCGAAAGATTGCTTGAAGTCA…	QVW10166.1
126	c134924_g1_i1	708	1926	17.81	Tymovirales	Alphaflexivirida	ssRNA(+)	Potexvirus	[Cnidium virus X]	CnVX	Asymptomatic plant	1323	504	735	17.54	238	5e-62	99.57	99	CGGATTTGCCGGTGACCACACCGTACTTGATCCTGCCGGCGAGCCTATCTCCCCCATCAC CAATGTGCTCTCCTTCGAAAAGATCGAGCTTCCCTCGCATTTTCCGAGTTTTTTAGCCAA ACAGCTTAAGGAATTAGGTCGATTACCTTGCTGGTACCCGGTTGATAGAACTAGGGCCCA GTCCTTTGGCAGTGACGTTAAAAACTCACGCATAGGAAGCCTTCTTAAAGCTCAGCCAGC TGATTTCAAGCAATCCTTCGCTGGCATGTGTGAATTCACGGAGAAGAAGGTCTTGCTCAC AGTCATCCATGGTGCAGGAGGCTCCGGCAAATCCCAAGCGCTCCAAGATTGGCTCCGAGC CAGTGGTAAGAAGTTCCGTGACTGCGTCGTCGT…	QVW10161.1
127	c141220_g1_i3	607	24349	281.69	Tymovirales	Alphaflexivirida	ssRNA(+)	Potexvirus	[Cnidium virus X]	CnVX	Asymptomatic plant	1294	1	179	13.83	57.8	8e-08	80.77	47	AAAAAAAAAAAAAAAAAAAAAAACGAAAACAAAACCACCCGCACCTACTCACAGAAACAT ATTACGAAGATCAAACGGAAGCCCCTGAGATCTTCGGATATGTTTCTTGTACGTGCACCC CTTGACCGGCTGACCGACGTTAGTGTTAAATCAGCACTCCAAGAAAGTGCTTATACACAA ATTTCGGTCACACTACGGCAAGGTCTATCCGTCAATCCTTGCTTAGTACTCGCAGATGCG CGAGACTTTGCAAGGTATGATGCCGGTACCCTAGTAGATAATCCTTGTCGGATACATACT AAGGGCGCCGACATCAGCGACACCCCCCACTTCCTCAAGCCGGATTTCGTACTTGAAATA TTTCATAACAATCCGATGCTTGACATACTATTA…	YP_010087351.1
128	c142820_g4_i1	599	3635	42.91	Tymovirales	Alphaflexivirida	ssRNA(+)	Potexvirus	[Cnidium virus X]	CnVX	Asymptomatic plant	1294	1	173	13.37	205.7	2e-52	99.42	86	TATTTTGAGCGAAAACCATCCGCACCTACCCACCTACGCATATCCCGAAAATCAAACGGA AATCCCTGAGATCTTCAGATATGTCTCTTGTGCGTGCAGCCCTTGACCGACTGACCGATG TCAGTGTTAAATCAGCACTTCAAGAAAGTGCTTATGCACAGATATCGGCCACACTACGGC AAGCCCAAACAGTCAACCCTTTTGCAGTACCCGCAGATGCTGCTGATTGTTTAGAAAAAT TAGGTATATTAACAAATCCCTTTAATGTAGCTGTACATACTCATTCAGCCGCTAAGGCTA TTGAAAATAAACTTTTAGAGATTGTAGGTCACAACCTCCCCAAGGAGTCTGTGAATTTGC TTTTCCTTAAGAAAAGCAAACTTAATCAATTGA…	QVW10166.1
129	c131741_g1_i1	490	1078	17.58	Tymovirales	Alphaflexivirida	ssRNA(+)	Potexvirus	[Cnidium virus X]	CnVX	Asymptomatic plant	1439	929	1091	11.33	202.6	2e-51	99.39	99	CACCGCCCTTTCCAGAGCTGTCAGTACTATACACTTTGTTAATACTGGTCCTAATGCTGC TGAATTTTGGGACAAGCTTGACGCCACACCCTACTTAAAGACTTTCATCGATAATGCAAG GGAAAACATTGCTAATCCTGAGATGGAACCGGCTTCTGATGCTCCCACTGAACCTGACGC CCCTGCCACCCATTTCCCTGTGGAGAACGATGCTTGCGCTCTCGGGATTTTTACTGATGC CCTCCCCGATAAGGAATCCAGAGAAATCTTCTCCAAGGACACAGGCCATAGCAATGCTGT CCAAACTTCTGACCCAGTCGTGCAGCTCTTTGCGCATCAGCAAGCCAAAGATGAAACTCT CTTTTGGGCCACTGTCGACCAAAGAATCACCAC…	QVW10166.1
130	c137714_g1_i1	388	448	33.6	Tymovirales	Alphaflexivirida	ssRNA(+)	Potexvirus	[Cnidium virus X]	CnVX	Dwarfed plant	1294	774	901	9.89	158.7	2e-38	99.22	99	CACCAACACACCCCTGTGTTCGGAGAAAGTCTTATACACCGCCCTCTCCAGAGCTGTCAG TACTATACACTTTGTTAATACTGGTCCTAATGCTGCTGAATTTTGGGACAAGCTTGATGC CACACCCTACCTAAAGACTTTCATCGATAATGCAAGGGAAAACATTGCTAATCCTGAGAT GGAACCGGCTTCTGATGCTCCCACTGAACCTGACGCCCCTGCCACCCATTTCCCTGTGGA GAACGATGCTTGCGCTCTCGGGATCTTTACTGATGCCCTCCCCGATAAGGAATCCAGAGA AATCTTCTCCAAGGACACAGGCCATAGCAATGCTGTCCAAACTTCTGACCCAGTCGTGCA GCTCTTTGCGCATCAACAAGCCAAAGAC	QVW10166.1
131	c133881_g1_i1	356	516	15.65	Tymovirales	Alphaflexivirida	ssRNA(+)	Potexvirus	[Cnidium virus X]	CnVX	Asymptomatic plant	1417	1049	1162	8.05	176.8	7e-44	98.31	99	GCGTCTTTGGGACAACTGCAAAGCTGAAGTCACTAACGCCTACCTTGCAAAACCCATGGC CAACCTTATGAACGGGGCTTCTAGACAGGACCCAGATTTTGACCCCAACGCCATCTCCCT CTTTCTAAAGTCCCAGTGGGTCAAGAAAACTGAGAAGCTAGGTTCACTTATCAAGCCAGG ACAAACTATAGCCGCTTTCATGCAAGAAACCGTTATGATTTACGGTACCATGGCTAGGTA TATGCGACGCATGCGTGAGATTTATCAGCCTTCCAATATTTTCATCAATTGTGAAAAAAC TCCGCAGGATCTGGACTCTTTCATACATGAACATTGGACTTTCAACACACCGGCAC	YP_010087351.1
132	c113551_g1_i1	298	4	0.55	Tymovirales	Alphaflexivirida	ssRNA(+)	Potexvirus	[Cnidium virus X]	CnVX	Dwarfed plant	1304	1112	1207	7.36	151	3e-36	98.99	99	AAGGCTAAATTCCACAACATCCCTGAGGAGATCATAGAAGGTTACATATACATTAAAACT CATGCTAAGATCTTCTTAGGAACCATTGCCATCATGCGCCTATCCGGAGAGGGCCCTACT TTTGACGCCAATACAGAATGCTCAATCGCATACCACCACACACGTTTCCATGTCCACCCA TCAACTGCTCAAGTTTACGCTGGTGATGACATGGCACAAGACTGTGAGCCGGTGGAGAAG ACCAGCTTCCGCGCCATTCAAGACAGGCTTGCTTTAACCTCTAAACCTGAGCGTTTTG	QVW10166.1
133	c142853_g1_i1	292	41	5.99	Tymovirales	Alphaflexivirida	ssRNA(+)	Potexvirus	[Cnidium virus X]	CnVX	Dwarfed plant	1323	120	171	3.93	50.8	5e-06	79.17	49	GAGGAGGTGTCCACTCCTTTATTGTACACTACACACTGATAACGCGGTACTACATATAAT GGGAACCCACTTAAGGTGGGGCCAGAAGTAGTAGTACGTCAAGCATCGGATTGTCATAAA ATATGTCGAGTATAAAATCCGGCTTGAGGAAGTGGGGGGTGTCACTGATGTCGGCGCCCT TAGTATGTATCCGACAAGGATTATCTACTAGGGTACCGGCACCATACCTTGCAAAGTCTC GCGCATCTGCGAGTACTATGCAAGGATTGACTGTTAAACCTTGCCGTAGTAT	YP_010087351.1
134	c135865_g1_i1	291	411	60.65	Tymovirales	Alphaflexivirida	ssRNA(+)	Potexvirus	[Cnidium virus X]	CnVX	Dwarfed plant	1417	1054	1150	6.85	157.5	3e-38	98.97	100	AACTGCAAAGCGGAAGTCACTAATGCTTACCTTGCGAAACCCATAGCCAACCTGATGAAT GGAGCTTCCAGACAGGACCCAGACTTTGACGCCAATGCCATCTCCCTCTTCTTGAAATCT CAGTGGGTCAAGAAAACTGAAAAACTGGGTTCTCTCATCAAGCCTGGCCAAACCATTGCT GCCTTCATGCAAGAAACCGTGATGATCTACGGTACTATGGCTAGGTATATGAGACGCATG CGTGAGATCTATCAGCCTTCAAATATTTTTATCAATTGTGAGAAAACTCCA	QVW10166.1
135	c142820_g2_i1	282	12	0.66	Tymovirales	Alphaflexivirida	ssRNA(+)	Potexvirus	[Cnidium virus X]	CnVX	Asymptomatic plant	1294	112	179	5.26	61.2	3e-09	79.17	51	CCACTCCTTTATTGCACACTACACACTTATAATACTATATTATATATATTGGAAACCCAC TTAAGGTGGGGCCAAAAGTAATAGCACGTCAAGCATCGGATTGTTATAAAATATGTCGAG TATGAAATCCGGCTTGACGAAGTGGAGGGTGTCGCTGATGTAGGTGGCCTTAGTATGTAT CCGACAAAGATTACCTACTAAGGTATCTACATCATACCTTTCAAAGTCTCGCGTATCTGC GAGTGCTGTGAAAGGATCGACTGGTTGGGCTTGCCGTAGTGT	YP_010087351.1
136	c139001_g1_i1	271	127	22.91	Tymovirales	Alphaflexivirida	ssRNA(+)	Potexvirus	[Cnidium virus X]	CnVX	Dwarfed plant	1504	6	95	5.98	110.5	4e-24	98.89	99	GAAAAGCAAATTCACAGACTCCTTGGGGAGGTTGTGACCTACAATCTCTAAAAGTTTATT TTCAATAGCCTTAGCGGCTGAATGCGTATGTACAGCTACATTAAAAGGATTTGTTAATAT ACCTAATTTTTCTAAACAATCAGCAGCATCTGCGGGTACTGCAAAAGGATTTACTGTTTG GGCTTGCCGTAGTGTGGCTGATATCTGTGCATAAGCACTTTCTTGAAGTGCTGATTTAAC ACTGACATCGGTCAGTCGGTCAAGGGCTGCA	QVW10166.1
137	c103103_g1_i1	270	24	1.49	Tymovirales	Alphaflexivirida	ssRNA(+)	Potexvirus	[Cnidium virus X]	CnVX	Asymptomatic plant	1304	206	294	6.83	121.3	3e-27	97.78	100	CCAGGAGGTCATGGCGGTGGGGCGTACTCTCACGAGTTCCCGGATTTAAATTGGCTCAAA TATGGCTATTTTCGTGGTACTGACAAGTATCCAGACACAGTAGTCACATGCCAACAGCTA GAATCTCTTGGTGCCAACCATTTGTTTGTGTACCAAAGAGGAGAGCTGAAAACTCCTAGG GTCCGAACTTTTTATGCAGACTCATTCGTCAAATTCCCCAAAGTTTTCCACCCCCGCCAC CTAAACTCCACCAGACCCATCAAACATAAG	QVW10166.1
138	c124997_g1_i1	250	122	28.21	Tymovirales	Alphaflexivirida	ssRNA(+)	Potexvirus	[Cnidium virus X]	CnVX	Dwarfed plant	1649	1249	1331	5.03	125.2	2e-28	100	99	GCAGCTCTTTGCGCATCAGCAAGCTAAAGACGAAACTCTCTTTTGGGCTACTGTTGACCA AAGAATCACCACCACCACCCCTGAAGAGAATCTCAAGGAGTTGGTCCTGAAGAAAGACCT GGGAGATATACTCTTTGAAAACTATAAGAAAGCCATGGGTCTCCCGTCTGACCCAATTCC CTTTGACCAGCGTCTTTGGGACAATTGCAAAGCTGAAGTCACTAACGCCTACCTTGCAAA ACCCATGGCC	YP_010087351.1
139	c137879_g1_i1	235	5	1.42	Tymovirales	Alphaflexivirida	ssRNA(+)	Potexvirus	[Cnidium virus X]	CnVX	Dwarfed plant	1649	1047	1123	4.67	106.7	6e-23	100	98	GGAGTGGTGAGCCCCTGGCATCCGGCATAGGTGTAGCTGGAGCGACCCATCTCTTGCAAG CATGCTTTCTTCTCAAGGCTCGGCGTTAGAGTTGGCCAACCTTCTTTCATTTGTGATGAG CATGTAATTTTGGCGGGAATAGTATTCTCCGCGTAGACTCCGAGAGCGGAAGCGATCTTG AGCGCATTCCTATGAGTGGCATTGAGGTGGAAACGACAAAATTGAGCAAAATGAG	YP_010087351.1
140	c125584_g1_i1	235	21	5.97	Tymovirales	Alphaflexivirida	ssRNA(+)	Potexvirus	[Cnidium virus X]	CnVX	Dwarfed plant	217	54	129	35.02	89	1e-17	97.44	99	CTTGCTAGGGCTCAACAGAGCCAACATAGCCAAAGGGTTTTGGGATATCGCCCTTCATTG CGCCGACGTTGGATCTTCTGCCTCCGTTACTCTAGTGGGTCACTGCGAACCTCTTGGTGA GACACGTGCCGAAATTGCCCGCATCATCAAACAACACTGCACTCTTAGGCAATTCTGCAT GTTTTATTCCAGAATCGTCTGGAATATCCTAATCAAAGAGAAGCGCGCTCCTGCC	QVW10170.1
141	c130387_g1_i1	204	19	9.19	Tymovirales	Alphaflexivirida	ssRNA(+)	Potexvirus	[Cnidium virus X]	CnVX	Dwarfed plant	1304	223	289	5.14	83.6	4e-16	90.91	97	TTGGCTCAAATATGGCTATTTCCGTGGTACTGACAAGTATCCAGACACAGTAGTCACATG CCAACAGCTAGAATCTCTTGGTGCCAACCATTTGTTTGTGTACCAAAGAGGAGAGCTGAA AACTCCTAGGGTCCGAACTTTTTATGCAGACTCATTCGTCAAATTCCCCAAAGTTTTCCA CCCCCGTCGGATACATACTAAGGT	QVW10166.1
142	c125557_g1_i1	363	123	10.62	Unclassified	Unclassified	ssRNA(+)	Satellite RNAs	[Cucumber mosaic virus satellite RNA	CMV-satellite	Dwarfed plant	335	182	1	53.73	304	2e-78	96.7	100	ACTGAGCGGGGGCTCAAATGAGAGTGCAGTACTGAGAGTAGCGGACATAGCTCGCAAGCCAGCGGTCCCCAGTCCGAGGGATCACGACTCGACCCGCCTTAGCAGGGAGGTATCCCACACCGCCGAGTGACAGATCCTCACGCAGATATAACCCCTCTGCGCAATTCTCTATCAAACAAAACGGTCCTGCGGAGGAATGTATAGACATTCACGGAGATCAGCATAGCATAAGCCTTAGCCTCTCCCTGCGTGCGTCATCCACGATACCACCTAACAGAGTGTTTCTTTCGAGTTTTCCATAGTAACGGCGAACCATGTGCCGGGTTTTGCTAGCAAACTGAGCGGGGGCTCAAACGAGTGTGT	M30584.1
143	c88805_g1_i1	711	7430	68.3	Unclassified	Unclassified	ssRNA(+)	Satellite RNAs	[Cucumber mosaic virus satellite RNA	CMV-satellite	Asymptomatic plant	1	99.41	507.1	2e-139	316/337	93	93.77	100	CCACGATACCACCTAACAGAGTTGTTCTTTCGAAGTGTCCATAGTAACGGCGAACCATGTGCCGGGTCTTGCTAGCAAACTGAGCGGGGGCTCAAATGAGAGTGCAGTACTGAGAGTAGCGGACATAGCTCGCAAGCCAGCGGTCCCCAGTCCGAGGGAACATCTCTCAACCCGCCTTAGCAGGGAGGTATCCCACACCGCCGAGTGACAGATCCTCACGCAGATATAACCCCTCTGCGCAATTCTCTATCAAACAAAACGGGTCCTGCGTAGGAATGTGTTGACATCCATGGAGATCAGCATAGCATAAGCCTTAGCCTCTCCCTGTGTGCGTCATCCACGATACCACCTAACAGAGTTTTTCTTTCGAAATTTCCATAGTAACGGCGAACCATGTGC…	DQ785472.1
144	c128177_g1_i1	3380	20719	30.36	Martellivirales	Bromoviridae	ssRNA(+)	Cucumovirus	[Cucumber mosaic virus]	CMV	Asymptomatic plant	961	2	960	99.79	734.6	3e-210	99.39	87	GTCTCCTTATAGAGAACCTGTGGGAAACCACAGGCGATACCCGCACTCTTGGTAATATCAGTGTATTACCGTGCACGAGCTTCTCACGAAGCCCTTCCGAAGAAATCTAGGAGATGATTTCAAGGGTACCTCGACAACCTTGTAAGATGTCGGCATGCCTTTGGGGCATGACTGACCATTTTAGCCGTAAGCTGGATGGACAACCCGTTCGCAACCAGTAATGGATTTAGCGACTTCAGATAGTTTAAAGCAAAACTACCAACTCAGCACTCGCAATAAAGAGAGTGTAGTTTAACGTCTTCGGACCTTCCGCGTTCAGACTAACGGAATACAAGTAGCGATTAGGTCCCCACCTAACACGCCACAGTACTCATAGCGGAAGGTGACCTTGTGTCGAGT…	QYA72448.1
145	c145574_g1_i1	3116	10995888	52243	Martellivirales	Bromoviridae	ssRNA(+)	Cucumovirus	[Cucumber mosaic virus]	CMV	Dwarfed plant	993	1	990	99.7	1677.9	0	99.6	95	CGCAGGACCGTTTTATTTACAAGAGCGTACGGTTCAACCCCTGCCTCCCCTGTAAAACTA CCCTTTGAATTCTTCTTCTCGACTTTTCTTAGTTTAAAATTCCTATGGCAACGTCCTCAT TCAACATCAATGAACTGGTAGCCTCCCACGGCGATAAAGGACTACTTGCGACAGCCCTCG TTGATAAGACAGCTCATGAGCAGCTGGAGGAGCAACTTCAACATCAACGTAGAGGCCTTA AGGTCTACATCCGTAATGTTTTGGATGTAAAGGACTCCGAAGTCATTCGGACTCGGTATG GTGGTAAGTACGACCTCCATCTTACCCAGCAGGAATTAGCTCCCCATGGCCTTGCTGGTG CCCTCCGCTTGTGTGAAACTCTCGATTGTCTAG…	BBG58103.2
146	c144883_g1_i1	3060	66813	323.67	Martellivirales	Bromoviridae	ssRNA(+)	Cucumovirus	[Cucumber mosaic virus]	CMV	Dwarfed plant	857	1	834	97.32	1308.5	0	98.93	82	GTCTCCTTATAGAGAACCTGTGGGAAACCACAGGCGATACCCGCACTCTTGGTAATATCA GTGTATTACCGTGCACGAACTTCTCACGAAGCCCTTCCGAAGAAATCTAGGAGATGATTT CAAAGGTACCTCGACAACCTTGTAAGATGTCGGCATGCCTTCGGGGCATGACTGACCATT TTAGCCGTAAGCTGGATGGACAACCCGTTCGCAACCAATACTGGATTTAGCGACTTCAGA TAGTTTAAAGCAAAACTACCAACTCAGCACTCGCAATAAAGAGAGTGTAGTTTAACGTCT TCGGACGACGAAGGGTCGGAAATCAGAACGACCCTTCGGCCCATTCGTTACCAGCAAACC AATCGGTATCATCAAAAGATTCATAAGAAACAA…	QJX15760.1
147	c128177_g2_i1	3030	17540		Martellivirales	Bromoviridae	ssRNA(+)	Cucumovirus	[Cucumber mosaic virus]	CMV	Dwarfed plant	857	1	834	97.32	1304.7	0	99.4	83	GTCTCCTTATAGAGAACCTGTGGGAAACCACAGGCGATACCCGCACTCTTGGTAATATCA GTGTATTACCGTGCACGAGCTTCTCACGAAGCCCTTCCGAAGAAATCTAGGAGATGATTT CAAGGGTACCTCGACAACCCTGTAGAGTGTCGGCATGCCTTTGGGGCATGACTGACCATT TTAGCCGTAAGCTGGATGGACAACCCGTTCGCAACCAGTAATGGATTTAGCGACTTCAGA TAGTTTAAAGCAAAACTACCAACTCAGCACTCGCAATAAAGAGAGTGTAGTTTAACGTCT TCGGACGACGAAGGGTCGGAAATCAAAACGACCCTTCGGCCCATTCGTTACCAGCAAACC AATCAGTATCATCAAAAGATTCAAAAGAAACAA…	BBG58104.2
148	c128177_g3_i1	2219	29834	68.91	Martellivirales	Bromoviridae	ssRNA(+)	Cucumovirus	[Cucumber mosaic virus]	CMV	Asymptomatic plant	279	1	279	100	472.2	5e-132	92.58	41	GTCTCCTTATGGAGAACCTGTGGAGAACCACAGGCGATACCCGCACTCTTGGTAATATCA GTGTATTACCGTGCACGAGCTTCTCACGAAGCCCTTCCGAAGAAATCTAGGAGATGATTT CAAGGGTACCTCGACATCTTGTAAGACATCGGCGTGTGAAAGACACGACTGACCATTTTA GCCGTAAGCTGGATGGACAACCCGTTCCCCGCGCAACAACACGTTTAGGGACTTCAGGCA GTTTGGAGCAATACTACCAACTCAGCACTCGCGATTGAGAGTGTAGTTTAACGTCTTCGG ACGCCGGTAAACACACGGACTAAGTCGGGAGCATCCGTGAGATAGGAATTCGTTGATGCT CGACGTCGACATGAAGTACAATCTCGTCCTTCT…	AAA46413.1
149	c144883_g2_i1	2180	157819	1105.24	Martellivirales	Bromoviridae	ssRNA(+)	Cucumovirus	[Cucumber mosaic virus]	CMV	Dwarfed plant	279	1	279	100	478.4	6e-134	100	38	GTCTCCTTATAGAGAACCTGTGGGAAACCACAGGCGATACCCGCACTCTTGGTAATATCA GTGTATTACCGTGCACGAACTTCTCACGAAGCCCTTCCGAAGAAATCTAGGAGATGATTT CAAAGGTACCTCGACATCTTGTAAGACATCGGCGTGTGAAAGACACGACTGACCATTTTA GCCGTAAGCTGGATGGACAACCCGTTCCCCGCGCAACAACACGTTTAGGGACTTCAGGCA GTTTGGAGCAATACTACCAACTCAGCACTCGCGATTGAGAGTGTAGTTTAACGTCTTCGG ACGCCGGTAAACACACGGACTAAGTCGGGAGCATCCGTGAGATAGGAATTCGTTGATGCT CGACGTCGACATGAAGTACAATCTCGTCCTTCT…	ABN03948.1
150	c101292_g1_i1	1486	579	1.8	Martellivirales	Bromoviridae	ssRNA(+)	Cucumovirus	[Cucumber mosaic virus]	CMV	Dwarfed plant	857	1	475	55.43	945.7	1e-274	98.74	95	AACCCCTGCCTCCCCTGTAAAACTCCCTAGACTTTAAAACTTTCTTTCTAGTATCTTTTC TATGGCTTCCCCCGCCCCCGCATTCTCACTAGCCAATCTTTTGAATGGTAGTTACGGTGT CGACACTCCCGAGGATGTGGAACGTTTGCGATCTGAGCAACGTGAAGAGGCTGCTGCGGC CCGTCGTAATTACGGGCCCCTACCCGCTGTGGATGTCAGCGAGAGTGTCACAGAGGACGC GCATTCCCTCCGAACTCCTGACGGAGCTCCCGCTGAAGCGGTGTCTGATGAGTTTGTAAC TTATGGTGCTGAAGATTACCTTGAAAAATCTGATGATGAGCTCCTTGTCGCTTTTGAGAC GATGGTCAAACCCATGCGTATCGGACAACTATG…	BAW81760.1
151	c121277_g1_i1	544	308	4.22	Martellivirales	Bromoviridae	ssRNA(+)	Cucumovirus	[Cucumber mosaic virus]	CMV	Asymptomatic plant	279	2	182	64.87	373.6	6e-103	100	99	GGCTTTCCAAGGTACCAGTAGGACTTTAACTCAACAGTCCTCAGCGGCTACGTCTGACGA TCTTCAAAAGATATTATTTAGCCCTGAAGCCATTAAGAAAATGGCTACTGAGTGTGACCT AGGCCGGCATCATTGGATGCGCGCTGATAATGCTATTTCAGTCCGGCCCCTCGTTCCCGA AGTAACCCACGGTCGTATTGCTTCCTTCTTTAAATCTGGATATGATGTTGGTGAATTGTG CTCAAAAGGATATATGAGCGTCCCTCAAGTGTTATGTGCTGTTACTCGGACAGTTTCCAC TGATGCTGAAGGGTCCTTGAGAATTTACTTAGCTGATCTAGGTGACAAGGAGTTATCTCC TATAGATGGGCAATGCGTCTCGTTACATAACCA…	BAW81737.1
152	c136478_g2_i1	542	107	1.48	Martellivirales	Bromoviridae	ssRNA(+)	Cucumovirus	[Cucumber mosaic virus]	CMV	Asymptomatic plant	857	643	822	21	362.5	1e-99	100	99	CCATATATTTGTTCGAAGTTCTTACTCTCTGACGAGTTCGGTAACACATTTTCCGTTCCA GATCCATTGCGCGAGGTTCAGCGGTTAGGAACAAAGAAAATTCCCTATTCTGACAATGAT GAATTCTTGTTTGCTCACTTCATGAGCTTTGTTGATCGATTGAAGTTTTTGGACCGAATG TCTCAGTCGTGTATCGATCAGCTTTCAATTTTCTTTGAATTGAAATACAAGAAGTCTGGG GAAGAGGCTGCTTTAATGTTAGGCGCCTTTAAGAAATATACCGCTAATTTCCAGTCCTAC AAGGAACTCTACTATTCAGATCGTCGTCAGTGCGAATTGATCAATTCGTTTTGTAGTACA GAGTTCAGGGTTGAGCGTGTAAATTCCAATAAA…	BAW81810.1
153	c121277_g2_i1	523	161	2.35	Martellivirales	Bromoviridae	ssRNA(+)	Cucumovirus	[Cucumber mosaic virus]	CMV	Asymptomatic plant	279	176	279	37.28	202.6	2e-51	100	59	AGCGTGTGTAGTAACTGGCAAGCAAGGTTTTCTTCTAAGAATAACAACTACACTCATATC GCAGCTGGGAAGACTCTAGTACTGCCTTTCAACAGATTAGCTGAGCAAACAAAACCGTCA GCTGTCGCTCGCCTGTTGAAGTCGCAATTGAACAACATCGAATCTTCGCAATATCTGTTA ACGAACGCGAAGATTAATCAAAATGCGCGCAGTGAGTCCGAGGAATTAAATGTTGAGAGC CCTCCCGCCGCAATCGGGAGTTCTTCCGCGTCCCGCTCCGAAGCCTTCAGACCGCAGGTG GTTAACGGTCTTTAGCACTTTGGTGCGTATTAGTATATAAGTATTTGTGAGTCTACACAT AATACTATATCTATAGTGTCCTGTGTGAGTTGA…	ALX35863.1
154	c136478_g3_i1	511	101	1.53	Martellivirales	Bromoviridae	ssRNA(+)	Cucumovirus	[Cucumber mosaic virus]	CMV	Asymptomatic plant	857	469	638	19.84	354.4	3e-97	98.8	97	AACCTCCCAGTTCTCACCGTTGTTCACAGCGCTATTCGAGCGCTTCCAGAGATGCCTTCG AGAACGTATTATTCTTCCTGTTGGTAAGATTTCATCCCTTGAGATGGCAGGATTTGATGT CAAAAACAAGCACTGCCTCGAAATTGATCTGTCTAAGTTTGATAAATCTCAAGGTGAATT CCATTTGCTAATTCAGGAACACATTTTGAATGGTCTAGGATGTCCAGCTCCGATAACTAA GTGGTGGTGTGATTTTCACCGATTCTCTTACATTAGAGACCGTAGAGCTGGTGTTGGTAT GCCTATTAGTTTCCAGAGACGAACTGGTGATGCATTCACTTATTTTGGCAATACCATTGT CACCATGGCAGAGTTTGCCTGGTGTTACGACAC…	QDD67576.1
155	c152796_g1_i1	458	65	1.19	Martellivirales	Bromoviridae	ssRNA(+)	Cucumovirus	[Cucumber mosaic virus]	CMV	Asymptomatic plant	993	618	769	15.31	306.2	9e-83	99.34	99	CAGGCGGTGATGACAAGAGAAATTCCCTCGAAGGTAATTTGAAGTTTGTGTTTGACACGT ATTTCACTGTTGACCCCATGGTGAACATTCACTTTTCGACGGGGCGGTGGATGCGTCCTG TGCCTGAGGGAATTGTCTACTCTGTTGGTTATAATGAACGCGGTTTAGGTCCGAAGTCTG ATGGAGAGCTTTTCATTGTCAATAGCGAGTGTGTGATATGTAATAGTGAGTCTTTATCTA CTGTTACACGCTCTCTCCAAGCTCCAACCGGAACCATTAGTCAGGTCGACGGGGTCGCTG GTTGTGGGAAGACCACGGCAATTAAATCTATTTTTGAGCCATCCACTGACATGATCGTTA CCGCGAACAAGAAGTCCGCCCAAGATGTGCGCA…	QBH72236.1
156	c121277_g4_i1	433	154	3.13	Martellivirales	Bromoviridae	ssRNA(+)	Cucumovirus	[Cucumber mosaic virus]	CMV	Asymptomatic plant	218	116	218	47.25	199.9	9e-51	90.76	82	AAATTTGATTCTACCGTGTGGGTGACAGTCCGTAAAGTTCCTGCCTCCTCGGACTTATCC GTTACCGCCATCTCTGCTATGTTTGCGGACGGAGCCTCACCGGTACTGGTTTATCAGTAT GCTGCATCTGGAGTCCAAGCTAACAACAAATTGTTGTATGATCTTTCGGCGATGCGCGCT GATATAGGCGACATGAGAAAGTACGCCGTCCTCGTGTATTCAAAAGACGATGCGCTCGAG ACGGACGAGCTGGTACTTCATGTTGACGTCGAGCACCAACGCATTCCCACGTCTGGGGTG CTCCCAGTCTGATTCCGTGTTTTCCAGAACCCTCCCTCCGATTTCTGTGGCGGGAGCTGA GTTGGCAGTTTTGCTTTAAACTGTCTGAAGTCA…	CEF39516.1
157	c101909_g1_i1	432	34	2.07	Martellivirales	Bromoviridae	ssRNA(+)	Cucumovirus	[Cucumber mosaic virus]	CMV	Dwarfed plant	279	36	179	51.61	302.4	1e-81	100	100	GCTACTGAGTGTGACCTAGGCCGGCATCATTGGATGCGCGCTGATAATGCTATTTCAGTC CGGCCCCTCGTTCCCGAAGTAACCCACGGTCGTATTGCTTCCTTCTTTAAATCTGGATAT GATGTTGGTGAATTGTGCTCAAAAGGATATATGAGCGTCCCTCAAGTGTTATGTGCTGTT ACTCGGACAGTTTCCACTGATGCTGAAGGGTCCTTGAGAATTTACTTAGCTGATCTAGGT GACAAGGAGTTATCTCCTATAGATGGGCAATGCGTCTCGTTACATAACCATGATCTTCCC GCTTTAGTGTCTTTCCAACCTACGTACGACTGTCCTATGGAAACAGTTGGGAATCGTAAG CGGTGTTTTGCTGTCGTTATCGAAAGACATGGT…	BAF93468.1
158	c78751_g1_i1	383	86	2.23	Martellivirales	Bromoviridae	ssRNA(+)	Cucumovirus	[Cucumber mosaic virus]	CMV	Asymptomatic plant	993	259	385	12.79	265	2e-70	97.64	99	CCGCGTGCGTAAATTCAAGACTTTGGTAGCTTTCGATTTCATCAACGAATCTACCATGTC TTATGTTCATGATTGGGAGAACATAAAATCTTTTCTAACGGACCAGACCTACTCTTATAA AGGAATGACCTACGGTATTGAACGTTGTGTCATTAATGCTGGTATTATGACGTATAAGAT CATCGGAGTACCTGGGATGTGTCCACCCGAACTTATTCGACATTGTATTTGGTTCCCCTC TATTAAAGACTATGTTGGTCTAAAGATTCCCGCGTCGCAGGACTTGGTTGAGTGGAAAAC AGTGCGTATTTTAACGTCAACATTACGTGAAACTGAAGAGATTGCTATGAGGTGTTATAA TGATAAGAAGGCGTGGATGGAAC	CCK24104.1
159	c147272_g1_i1	379	35	2.76	Martellivirales	Bromoviridae	ssRNA(+)	Cucumovirus	[Cucumber mosaic virus]	CMV	Dwarfed plant	218	116	218	47.25	199.9	8e-51	90.76	94	AAATTTGATTCTACCGTGTGGGTGACAGTCCGTAAAGTTCCTGCCTCCTCGGACTTATCC GTTACCGCCATCTCTGCTATGTTTGCGGACGGAGCCTCACCGGTACTGGTTTATCAGTAT GCTGCATCTGGAGTCCAAGCTAACAACAAATTGTTGTATGATCTTTCGGCGATGCGCGCT GATATAGGCGACATGAGAAAGTACGCCGTCCTCGTGTATTCAAAAGACGATGCGCTCGAG ACGGACGAGCTGGTACTTCATGTTGACGTCGAGCACCAACGCATTCCCACGTCTGGGGTG CTCCCAGTCTGATTCCGTGTTTTCCAGAACCCTCCCTCCGATTTCTGTGGCGGGAGCTGA GTTGGCAGTTTTGCTTTAA	CEF39516.1
160	c125557_g1_i1	363	123	10.62	Martellivirales	Bromoviridae	ssRNA(+)	Cucumovirus	[Cucumber mosaic virus]	CMV	Dwarfed plant	27	1	27	100	57.8	3e-05	87.8	33	ACTGAGCGGGGGCTCAAATGAGAGTGCAGTACTGAGAGTAGCGGACATAGCTCGCAAGCCAGCGGTCCCCAGTCCGAGGGATCACGACTCGACCCGCCTTAGCAGGGAGGTATCCCACACCGCCGAGTGACAGATCCTCACGCAGATATAACCCCTCTGCGCAATTCTCTATCAAACAAAACGGTCCTGCGGAGGAATGTATAGACATTCACGGAGATCAGCATAGCATAAGCCTTAGCCTCTCCCTGCGTGCGTCATCCACGATACCACCTAACAGAGTGTTTCTTTCGAGTTTTCCATAGTAACGGCGAACCATGTGCCGGGTTTTGCTAGCAAACTGAGCGGGGGCTCAAACGAGTGTGT	1209333B
161	c144907_g2_i1	333	6137636	644039	Martellivirales	Bromoviridae	ssRNA(+)	Cucumovirus	[Cucumber mosaic virus]	CMV	Dwarfed plant	49	1	41	83.67	79.7	6e-12	90.24	36	GTTTTGTTTGATAGAGAATTGCGCAGAGGGGTTATATCTGCGTGAGGATCTGTCACTCGGCGGTGTGGGATACCTCCCTGCTAAGGCGGGTCGAGTCGTGATCCCTCGGACTGGGGACCGCTGGCTTGCGAGCTATGTCCGCTACTCTCAGTACTACACACTCGTTTGAGCCCCCGCTCAGTTTGCTAGCAAAACCCGGCACATGGTTCGCCGTTACTATGGATTTTCGAAAGAAACACTCTGTTAGGTGGTATCGTGGATGACGCACACAGGGAGAGGCTAAGGCTTATGCTATGCTGATCTCCGTGAATGTCTATACATTCCTCCGCAGGA	AAA46390.1
162	c110015_g1_i1	325	23	3.43	Martellivirales	Bromoviridae	ssRNA(+)	Cucumovirus	[Cucumber mosaic virus]	CMV	Dwarfed plant	993	514	621	10.88	139.4	1e-32	100	99	CGTTGCTACACAGGCTGTTACTGATGGGAAAGTTTTGGCTGCGCAGAAAGCCGAGAAGCT CGCTGAGAAGCTTGCACAACCCGTAGATGAGGTATCAGGCAGCCCTGAGGTGCCATCTTC AACACCCGATGATACTGCCGATGTTTGTGGAAAAGAGCAAGAAGTTTCGGAACTTGACTC ATTATCGGCTCAGACACGTTCCCCCATCACTAGAGTTGCTGAAAGGGCTACTGCCATGCT GGAGTATGCTGCTTATGAGAAACAGTTACATGATACCACAGTGTCTAATTTGAAACGTAT TTGGAATATGGCAGGCGGTGATGAC	ANA96226.1
163	c157569_g1_i1	273	3	0.53	Martellivirales	Bromoviridae	ssRNA(+)	Cucumovirus	[Cucumber mosaic virus]	CMV	Dwarfed plant	857	347	437	10.62	185.3	1e-46	100	98	AGAGTAGGTACAACGAAGGAGGTCCTTACAGCAATTAAGAAACGTAATGCTGACGTTCCA GAGCTAGGTGATTCCGTTAATCTGTCTAGATTGAGTAAAGCTGTGGCTGAGAGATTCTTC ATTTCATACATCAATGGTAACTCTCTAGCATCCAGTAACTTTGTCAATGTCGTTAGTAAC TTCCACGATTACATGGAAAAATGGAAGTCCTCGGGTCTTTCTTATGATGATCTCCCAGAT CTTCATGCTGAGAATTTGCAGTTTTATGATCAC	QKQ14852.1
164	c136478_g1_i1	272	31	1.88	Martellivirales	Bromoviridae	ssRNA(+)	Cucumovirus	[Cucumber mosaic virus]	CMV	Asymptomatic plant	110	39	110	65.45	145.2	2e-34	93.83	89	AAAAGTCCCAGCGAGAGAGCGCGTTCAAATCTCAGACTGTTCCGCTTCCTACCGTTCTAT CAAGTAGATGGTTCGGAACTGACAGGGTCGAGCCGCCATGTGAACGTGGCGGAGTTACCC GAGCCTGAGGCCTCTCGTTTAGAGTTATCGGCGGAAGACCATGAGTTTGACGATACGGAT TGGTTCGCCGGTAACGAATGGGCGGAAGGTGCTTTCTGAAACCTCCCCTTCCGCAACTCC CTCCGGTCCTGTGGCGGGAGCTGAGTTGGCAG	QYO45781.1
165	c78875_g1_i1	266	17	3.24	Martellivirales	Bromoviridae	ssRNA(+)	Cucumovirus	[Cucumber mosaic virus]	CMV	Dwarfed plant	857	102	189	10.27	177.9	2e-44	93.18	99	GGTCAAACCCATGCGTATCGGACAACTATGGTGCCCTGCGTTTAATAAATGTTCTTTTAT TTCCAGCGTTGCTATGGCCAGAGCTTTGCTGTTGGCACCTAGAACATCCAACCGAACCAT GAAGTGTTTTGAAGACCTGGTCGCGGCTATTTACACTAAATCTGATTTCTATTATGGTGA AGAGTGTGAAGCCGACGACGTTCAGATGGATATCTCGTCTCGCGATGTACCCGGTTATTC TTTCGAACCGTGGTCCCGAACGTCTG	QYO45780.1
166	c80991_g1_i1	265	48	3.15	Martellivirales	Bromoviridae	ssRNA(+)	Cucumovirus	[Cucumber mosaic virus]	CMV	Asymptomatic plant	993	915	992	7.85	164.5	2e-40	100	89	GGGCGAAAGAGATGAACTTACCGAAGACTTTCTGGAACGAAAGGATTAAGACCGTGCATG AGTCTCAAGGCATTTCTGAAGATCATGTTACTTTGGTAAGATTAAAGAGCACAAAGTGTG ACCTATTTAAACAGTTTTCTTACTGTCTTGTTGCCTTGACTAGACACAAGGTCACCTTCC GCTACGAGTATTGCGGTGTATTGAACGGCGATTTGATCGCCGAATGTATTGCTCGTGTTT AGCGGTTTCCCTCCCTTGGGCGGGA	QVL22720.1
167	c34997_g1_i1	253	10	2.23	Martellivirales	Bromoviridae	ssRNA(+)	Cucumovirus	[Cucumber mosaic virus]	CMV	Dwarfed plant	110	46	110	59.09	132.1	1e-30	93.24	87	CGCGTTCAAATCTCAGACTGTTCCGCTTCCTACCGTTCTATCAAGTAGATGGTTCGGAAC TGACAGGGTCGAGCCGCCATGTGAACGTGGCGGAGTTACCCGAGCCTGAGGCCTCTCGTT TAGAGTTATCGGCGGAAGACCATGAGTTTGACGATACGGATTGGTTCGCCGGTAACGAAT GGGCGGAAGGTGCTTTCTGAAACCTCCCCTTCCGCAACTCCCTCCGGTCCTGTGGCGGGA GCTGAGTTGGCAG	QYO45781.1
168	c107313_g1_i1	248	20	4.75	Martellivirales	Bromoviridae	ssRNA(+)	Cucumovirus	[Cucumber mosaic virus]	CMV	Dwarfed plant	218	20	101	37.61	166.4	6e-41	98.78	99	GTGGTTCCCGCTCCGCCCCCTCCTCCTCGGATGCTAACTTTAGAGTCTTGTCGCAGCAGC TTTCGCGACTTAACAAGACGTTAGCAGCTGGTCGTCCAACCATTAACCACCCAACCTTTG TAGGGAGTGAACGCTGTAAACCTGGATACACGTTCACATCTATTACCCTAAAGCCGCCAA AAATAGACCGCGGGTCTTATTATGGTAAAAGGTTGTTATTACCTGATTCAGTCACGGAAT ATGATAAG	UIE45453.1
169	c154000_g1_i1	242	15	1.32	Martellivirales	Bromoviridae	ssRNA(+)	Cucumovirus	[Cucumber mosaic virus]	CMV	Asymptomatic plant	993	440	519	8.06	163.7	4e-40	100	99	ATGTACGATATGTGGAATGCTTCGAGTATCTCGAAGTGGTTCGCAGCGTTGACTCGCCCG CTGCGTGTGTTTTTCTCTAGTGCTGTTCACGCACTGTTCCCGACTTTGAGACCCCGTGAG GAAAAAGAATTCCTGATTAAGCTCTCCACCTTCGTAACTTTTAATGAAGAGTGCTCATTT GACGGTGGAGAGGAATGGGACGTGATATCATCTGCTGCATACGTTGCTACACAGGCTGTT AC	AYP19430.1
170	c108957_g1_i1	241	2	0.52	Martellivirales	Bromoviridae	ssRNA(+)	Cucumovirus	[Cucumber mosaic virus]	CMV	Dwarfed plant	857	558	637	9.33	166.4	6e-41	100	99	TACATTAGAGACCGTAGAGCTGGTGTTGGTATGCCTATTAGTTTCCAGAGACGAACTGGT GATGCATTCACTTATTTTGGCAATACCATTGTCACCATGGCAGAGTTTGCCTGGTGTTAC GACACCGACCAATTCGAAAAGCTTTTATTCTCGGGTGATGACTCTCTAGGATTTTCATTG CTTCCCCCTGTTGGTGATCCGAGTAAATTCACAACTCTTTTCAACATGGAAGCTAAGGTG A	QWY13088.1
171	c98553_g1_i1	230	19	5.82	Martellivirales	Bromoviridae	ssRNA(+)	Cucumovirus	[Cucumber mosaic virus]	CMV	Dwarfed plant	993	251	326	7.65	152.5	9e-37	93.42	99	GTAAACTTAATTCCACTGTGTTCACCCGCGTGCGCAAACACAAGACTTTGGTAGCTTTCG ATTTCATCAACGAATCTACCATGTCTTATGTTCATGATTGGGAGAACATAAAATCTTTTC TAACGGACCAGACCTACTCTTATAAAGGAATGACCTACGGTATTGAACGTTGTGTCATTA ATGCTGGTATTATGACGTATAAGATCATCGGAGTACCTGGGATGTGTCCA	QKQ14846.1
172	c156119_g1_i1	219	13	1.65	Martellivirales	Bromoviridae	ssRNA(+)	Cucumovirus	[Cucumber mosaic virus]	CMV	Asymptomatic plant	993	785	857	7.35	145.2	1e-34	100	100	GTTGTATTGCTACATTTTGGTCAATTGTGTGCTGTTATGTCTAAACTGAAGGCTGTGCGA GCTATATGTTTTGGGGATTCGGAGCAGATTGCTTTTTCTTCTCGAGATGCCTCGTTTGAC ATGCGTTTCTCTAAGATAATTCCTGATGAAACTAGTGATGCGGACACTACATTCCGTAGC CCACAAGACGTCGTGCCGCTTGTGCGTTTGATGGCTACG	AUX84052.1
173	c98553_g2_i1	216	5	1.93	Martellivirales	Bromoviridae	ssRNA(+)	Cucumovirus	[Cucumber mosaic virus]	CMV	Dwarfed plant	993	193	264	7.25	116.3	6e-26	97.22	100	AGAGGATTATGTGAGGCAATGAATGCCCACGGAACCACCATTTTGAAGGGAACGATGATG TTCGATGGTGCGATGATGTTTGACGACCAAGGTATAATTCCCGAACTTAATTGCCAGTGG AGGAAGATTAGGAACGCTTTCTCCGAAACTGAAGACGTCACTCCGTTAGTTGGTAAGCTT AATTCCACTGTGTTTTCCCGCGTGCGTAAATTCAAG	CAI61990.1
174	c56947_g1_i1	205	0	0	Martellivirales	Bromoviridae	ssRNA(+)	Cucumovirus	[Cucumber mosaic virus]	CMV	Dwarfed plant	857	35	101	7.82	128.6	1e-29	97.01	98	GTGAAGAGGCTGCTGCGGCCCGTCGTAATTACGGGCCCCTACCCGCTGTGGATGTCAGCG AGAGTGTCACAGAGGACGCGCATTCCCTCCGAACTCCTGACGGAGCTCCCGCTGAAGCGG TGTCTGATGAGTTTGTAACTTATGGTGCTGAAGATTACCTTGAAAAATCTGATGATGAGC TCCTTGTCGCTTTTGAGACGATGGC	QDQ37931.1
175	c142883_g1_i1	209	12	1.83	Geplafuvirales	Geminiviridae	circular ssDNA	Begomovirus	[Cucurbit leaf crumple virus]	CuLCrV	Asymptomatic plant	351	308	351	12.54	46.2	8e-05	45.45	63	GGGAGGGGACAAGTTATCAAGACTTCCTCGAGAAGCCTTACAATAACTCTCTCAAACTGT GGACATAAAAAAACGCCCACTACGAGTGCATCCAACATCCGTTTTTCTTGCCTACAGCTG AAGAACCAGACGACTAATAGACGGCAGTCATCATGAACGCAAGAACAGGAGAGCAACTCA CGGAAACACACCTAAACAACGGAGTTATG	NP_148988.1
176	c108941_g2_i1	248	10	0.81	Mononegavirales	Rhabdoviridae	ssRNA (-)	unassigned	[Cynara cardunculus rhabdovirus]	CyRV	Asymptomatic plant	2085	510	591	3.93	134.8	2e-31	92.68	99	GCTAAACACACCCAGCGTCATGTCTTTCCTCATATGTCCGTTCCATTTTTCAAAATCTAG AGACATGCAAATCACTCTTGAAACCCAATTTCCAGACTTATTCTTTCTCTTCACGCGCGA TGATTGATTTTTGACTGTCGCATACATCTTCTTTGTAAGATCCAGCAGGCTATCGGTCAT GGTAATTTGAGGGAACATCTTAAGTATATGATCTGATAACATCTGCTCTGTGACCACCAC ATAAACTC	CEP27873.1
177	c142710_g1_i1	272	10	1.78	Ortervirales	Caulimoviridae	circular dsDNA,RT	Caulimovirus	[Dahlia mosaic virus]	DMV	Dwarfed plant	703	653	700	6.83	82.8	1e-15	72.34	51	CTTTATTGATAGCCTGAAAATGACGCACTGAATGATGTCATTAGGCTTCATTGGATTCCT GCAAAAGTAAACAAGAAGACAAAATATCTTAAAGTTAATTTTAATAATGGTATTCCCTTG TCAAGAAATCTGCTAGGCAATTCTTGATTCCTTCAATGTGCTGGACATCAAAGCTATAAC GACTTAGCCATTGTTGCCAACGTACAAGTCTTCCTTGCTTATTATCTCCCTGTAACTTAA TACGAAGAAAAATAAGTAAAGTTTCTATTATC	AGT41978.1
178	c92068_g1_i1	408	42	0.96	Ortervirales	Caulimoviridae	circular dsDNA,RT	Badnavirus	[Dioscorea bacilliform TR virus	DVB9	Asymptomatic plant	1948	1213	1349	7.03	161	4e-39	81	25	TCACTTATTGCTTTGACATGCAGCTAAATGATGGGATTCAAATGATGATTGGATGTAACT TTATAAGAGCCATGCAAGGAGGACTGAGGCTGGAAGGAAATAACATCACGTTCTACAAAA ACGTGACCAGCATCAACACTCAGCAGGAAGTTATTGCCAAGGCAATTCCAGAATTTGACA TGGATTATGAAGAACTCCAGGAACTACAGGAAGTAGTATATTTTAACCTGGAAAAAGGAA GCAAGAGTTTCAGAGCAAAATGTGGACCCCTTCTGAAGAAACTCGAAGAAGGAGGATTTA TAGGAGAAGAGCCCCTGAAACATTGGCAGAAGAACAAGATAAGATGCAGGTTGGATATCA TTAACCCATATATCTGCATACAAGATAAGCCTC…	NC_038995.1
179	c125393_g1_i1	4564	108613	115.92	Reovirales	Reoviridae	linear dsRNA	Spinareoviridae	[Fiji disease virus]	FDV	Asymptomatic plant	1470	65	1447	94.08	630.9	1e-176	31.45	89	GACTGAAATTATTACTGAAATTATCTCTCTTAACCCTCTGCAAACGAGATTCATTTGTGATATTGAAAACAATTACACGAAATTTATATAACATATAAAAAACAAAATAACTGAAAAAAATTACAACAATAACAAAAGGAATAACATGTAACATAATTCTTGACGACCATTTGATACTAACATTTCAATTTGTAACGTTTAGACCAATATGGCCTTTACTAATGCTGTTGATTCCGTTATCAATGCTATTCGACATAGAATGGATGATTATAAACAAAGATCGATTAAAGTTTCTGAAAATAGGAAATTAAGGTATAAAAGTGAAAATAATATACAGCATTTATTTACAAAAAAGGTTTTTGATGTTAATAAGGGAAAAATTGAATATAAGAAGATTTA…	YP_249762.1
180	c114752_g1_i2	3774	41754	54.43	Reovirales	Reoviridae	linear dsRNA	Spinareoviridae	[Fiji disease virus]	FDV	Asymptomatic plant	1193	146	1184	87.09	199.1	3e-49	22.24	81	GAATGTAGTCACTTATCGATACAAACGCTAAAAAAGAACGTGAACAAGCAATCGAATCTAATAGTAGTGAAACTACTGAAAAGAAAGAAAACATAACTGACAATATTGAAGAGAAATCAACGAATGTCGAAATGAAAACAAAAGATAATGAGATGAAAGATGAAAAAAATGCTGACAAAAGTACTGCCAGTACCTCTAATTCCAGTTCAGACAATGTTAACAATCCAATTACTGCACAACCAACACCTTCACCATTAGTTGCTATTGACGGAGCATCTTGGAATTTAGTTACTTTTAAACAACAAAATCAAGCGAATATTGACAACATTAAAGCTGCTATTGAAGGAGTTCAGAAAATCGAAATCTTTTCTTTACAGAGTGATGAACCGTTAAACAAGT…	YP_249756.1
181	c135055_g2_i1	3759	54839	213.4	Reovirales	Reoviridae	linear dsRNA	Spinareoviridae	[Fiji disease virus]	FDV	Dwarfed plant	1193	146	1184	87.09	198	3e-49	22.15	81	AATGAAGTCACTTACCGATACAAACGCTAAAAAAGAACGTGAACAAGCAATCGAATCTAA TAGTAGTGAAACTACTGAAAAGAAAGAAAACATAACTGACAATATTGAAGAGAAATCAAC GAATGTCGAAATGAAAACAAAAGATAATGAGATGAAAGATGAAAAAAATGCTGACAAAAG TACTGCCAGTACCTCTAATTCCAGTTCAGACAATGTTAACAATCCAATTACTGCACAACC AACACCTTCACCATTAGTTGCTATTGACGGAGCATCTTGGAATTTAGTTACTTTTAAACA ACAAAATCAAGCGAATATTGACAACATTAAAGCTGCTATTGAAGGAGTTCAGAAAATCGA AATCTTTTCTTTACAGAGTGATGAACCGTTAAA…	YP_249756.1
182	c146569_g1_i1	2498	1297	7.82	Mononegavirales	Rhabdoviridae	ssRNA (-)	unassigned	[Glehnia littoralis virus 1]	GlLV1	Dwarfed plant	412	9	405	96.36	290.8	2e-77	93.45	49	TTTCTCTGCGACCTTTGTTCAATCGTTCCTGTTTTCATATACACTTATTACATATCACCA TCATTATGTCTGCTGCACTTGCCGCTGCTCTGGCTGCTCAGACCCGATATTCAGGAGTCG ACGACATAGATGCGAACTCAGGCAGACCCGTATCAGTATGGGAGGTTGGACATGAGAGGA AGATTAAAATCTATGATGTCGCTATTATGGATGCTAAAACTGCTAATAAATATGGGACAT ATATGATGGACTGCCTTAGTACGGGTACGAACATAAATTCCGATTTAGCTAAAATTATGT TGTCTTTAGCTGTGTCTATGAGAGATCCTGAAGAGATTTCTAATTTTCTGTTGTCAAAGC CCGCACGAGATGCGAAATTCCTGATGCCGTTCG…	DAF42321.1
183	c146812_g1_i1	1939	1792	14.29	Mononegavirales	Rhabdoviridae	ssRNA (-)	unassigned	[Glehnia littoralis virus 1]	GlLV1	Dwarfed plant	2068	1188	1819	30.56	339.3	2e-91	92.5	99	GCGGAAGGTGTTGGGAGATCCAGGACACGCAGGCACTGCTCATACTCCCTATCCGATTTGTCATCTCAGCCGGGGAAAAGAGATAGTCTTTAATTAGCGCACAATTCCAATCCTTGAGGGTCAGCAATTTCTCAAAAATGATCTGCCTTTCTTTCTTTGCATCGAAATCTGTGACTTCTATGTCACTAACGACGATAGAACAATGCTTTGTATCTGATGCCCAATCCCTACTCCATGCAGGATCGATGATGTTGTTAGATTTGTTGATCATCAATTTAGAATTGATCTTATCAGCTCTGTATTCCATGGAGAGGGGACAAACATTGTGCACGTATGTCTGAGGTATGGCATCATCTGGGTTGAGAATAGTGGAAATAATTACAGAATCAGCTCCCATTG…	DAF42327.1
184	c134076_g1_i1	1215	131	3.2	Mononegavirales	Rhabdoviridae	ssRNA (-)	unassigned	[Glehnia littoralis virus 1]	GlLV1	Dwarfed plant	2068	607	1009	19.49	411.4	1e-113	95.79	99	CTATCCACATACCCAAATATAGTTGCCTCATATATATCATGTAGCAATCGTATATGTAGTTCAGACCCTTCACATAAACATTCAGATAAATAATCACTCATATTTTTGTACTTACTACCCATCAGATCTTTGAATTCATCATTAGTTATGTGTACTCCAGAACTCATGTACTTGGCTACCAGCTGTCTTATCCCTGATGTTGGAGATCGGGGAGAAAGGAGATTCAGCGCTGTTACATCCTCTAACAAGGTGGCATAATTTATTCCAGGCATATATATAGGAGTCAGCCAACATTGTATACAATCTTTGAGCCAGGGGAGGATATTTTGACTCTCTAATATTTTTGTCAGGTAGCATATATCTCTGGAAGCATTGTCTGGGAATCCACGCATCATGAAC…	DAF42327.1
185	c135435_g2_i1	1052	70	1.14	Mononegavirales	Rhabdoviridae	ssRNA (-)	unassigned	[Glehnia littoralis virus 1]	GlLV1	Dwarfed plant	560	49	348	53.57	100.9	1e-20	48.04	92	GTACTATTTCTATATAATTTGTAACATTTCATCAAAACTCTGACTACAGAGACTCTGAAT GATGTCACTTTATACTCTATAGATAGGAATCTGAACTGATTCTAACAAATTTATGAATCG ATGATTTGTGACATTTTGAATCTTAAACCTCAGACAATCACCATCTCCTGTCATCCCTTG TGTTTGCGTGATATAAAGGTGTTTGTGTTTGTTAATTTGTAGATTCATCCAATAATCTGT ACAGGAAACCTTCTGCAGACCGCTTCAGTCCACTGCATGGTGGCTCAGCTACGTCATCCG CGAGTCTTGTTGGGGTTACTGAATACCTACCATCAGCGCACATATGGTAAGCGTTCTCAT CTGATCCCCTTTTATTCATCTAACTCATAAGAA…	DAF42325.1
186	c133641_g1_i1	1009	162	0.94	Mononegavirales	Rhabdoviridae	ssRNA (-)	unassigned	[Glehnia littoralis virus 1]	GlLV1	Asymptomatic plant	560	87	423	60.18	130.2	2e-29	48.13	99	CCAGTTCATTATCTATAACGTAGGACTCTGATTCTAGAATGAATGATAGTTTCTCATGAT AACCAAGATTATAACACACTATTCCTGGGATCATGTGAGGCAATATAGGATCTCATAATT CTGAATTAGTGGAGCATACTACACCCATGCGCTGCGTCTTCCATCAAATCGGAATCTGAT TGGTGAGTGCACAACCCGTTACAATTTTGCATCATTTCACTGTACTATTTCTATATAATT TGTAACATTTCATCAAAACTCTGACTACAGAGACTCTGAATGATGTCACTTTATACTCTA TAGATAGGAATCTGCACTGATTCTAACATATTTATGAATCGATGATTTGTGACATTTTGA ATCTTAAACCTCAGACAATCACCATCTCCTGTC…	DAF42325.1
187	c146827_g1_i1	957	205	3.77	Mononegavirales	Rhabdoviridae	ssRNA (-)	unassigned	[Glehnia littoralis virus 1]	GlLV1	Dwarfed plant	2068	721	1032	15.09	294.3	3e-78	96.24	100	CACTCATTTACGCAGGCAGGGCTTCCTTTAAAACCACTAGAGACATGGATGTCCGAGGACTTATACTTATACGGAAAAGTGCCGATGTGGAAAGGAGTCCCGTTATCTCTTGACATGAAGAAACTAATGAGAACTTTCCCTATGAGCAATGAGGGGGTAATGATATTGGAGAATGCACTTGGGACGGTATCAAGTAACGCAACAGCTGCAACGCAAGCTAGTCCTTGTGTATGGACAGCGTACATCGTTGCTATCCTTATGTCCTCCTTATGTCTTCAAGATTTCGGAGATTATCACCCTCTTCTAGGGGATGGGTCGAATCGTTTATCATTTCAGGAACACAAGTGGACACTTGCCATGTCGAGCGCTGAGAAGCATAAGTACGAGATCAGAAGAGAT…	DAF42327.1
188	c137947_g2_i1	751	17	1.68	Mononegavirales	Rhabdoviridae	ssRNA (-)	unassigned	[Glehnia littoralis virus 1]	GlLV1	Dwarfed plant	300	95	288	64.67	51.6	2e-05	88.46	93	ATCAGATCAAGACAATGTCTAAGACAGAAGCGATTGATGAATCACATATCATATGGTATGTTAGAGGAATTTCCCTAGCGAACAATACTAGTGTTTTAGCTGCCATCACTGATTCTGTCTCAGAGTTAAAGTCGGAATCAAAGCATTTGTTTAGTGTGGCTAACAAGACGTCCAAGGTTGTTTCTTCTGTTGATAAAGTTGCAGTAGGTTTGAGAAGTCTTCTCGAAGACTTGTCCTCAAAGACCAAGGAGTCATTTGAAAAGACTGTGAGCGCATTGGCGACATCTTATGAGGAAAAGATTAAGCATTTATCAGATGCCTCTAAACTGCCTTCAGCGTCAATTGTTGTGTCAGTACCTGACCCTCCTAAGGCTCCAGTTACCTTAGACAAGAAGACTG…	DAF42322.1
189	c127779_g1_i1	735	80	0.7	Mononegavirales	Rhabdoviridae	ssRNA (-)	unassigned	[Glehnia littoralis virus 1]	GlLV1	Asymptomatic plant	224	29	157	57.59	124.4	8e-28	98.27	70	TGCAAATTCTAGCTCAACATTCCTGGTCAAAATAGCAACACAACACCAGAAAGTCGACAT TCTTAGATCTATTCTCTGCTAACTTGAAAATGATACTTATGTATTTCACACCCAGTCTAG TTTTTATTAAGCACAAAAAGCCACACACTCGACGGATATAATCCCCATCGACTCTTAATA TTGCTTAATAAGACTGACGTTTGTCATCAATCTCAGTCATCACAGAGAGCGTAACGGGCT GATCTACTAGAACCTAAACTGGCAGGTTTTTTCTCATTTTCTAGTGTCCTCACAGCAAAC GAAGAACATCTAGAAATTGCCCTGGTTGGAATGGGTGACAGCTTTGCTACAGAAGGCTTC GGTTTTATCATTGGGAGCATCTTATTATAAGTA…	DAF42323.1
190	c124432_g1_i1	639	71	0.76	Mononegavirales	Rhabdoviridae	ssRNA (-)	unassigned	[Glehnia littoralis virus 1]	GlLV1	Asymptomatic plant	224	1	67	29.91	72.8	2e-12	85.44	48	CGATGATAGACGCTGTGACCTGCCCGCGACCCAGCTCTCCGGCCCTCGGTTCATAAATAA ATAGAATCCTTCGGATCCGAATGTTCTCAGCCCATTGCGTTTTCAACATCTGCCAAAAGT TCAACTTCTTAGTCAAAGCTATCGAACCGCCCTCTGATGCAGTTGTTAATTCAGTACATA TCTTGAAAGAGAAAGAGTTTTCCATGACCAATCTTATAAGAAATAGTTGATACGATTATT TCCGGTGTATTTCACATATTATCTAGTTTTATTAAACCAATCCGGCATATATTAAACACA CATATTAAAAGTACTCGTATTATGCTGAAGATGTTCCTGGTGTCATTCTTGATAGGTAAG TATTGAGATTGTCCATAAGGACCTTCTTTATCC…	DAF42322.1
191	c133315_g1_i1	620	79	0.89	Mononegavirales	Rhabdoviridae	ssRNA (-)	unassigned	[Glehnia littoralis virus 1]	GlLV1	Asymptomatic plant	2085	58	258	9.64	174.5	6e-43	84.95	99	CGATGACCAGTGCTTCATAGGCTTTTAATAATTTAAAACCGTCATTTCCTTTATGCTCTA GGACATCGTCTCCCCAATTAAAGATCTCGTTGATCACCTGCTCTGTCGGGTAGTGATAAG CGTTTATCTCTCTACCTATCTTTCCAGATATTAGTAGAAGAAAACGTTGTGTGTAAATAT CCGACGCCATACGAACCCAATCTCCATCAAATATTTCCTGGAGATCTTTGTGTACAAACA TTACGCATGTTTTGCAGATGCGGATCTCTGCCCCGTGCTTCATTGCCATCATTCCGATCC CTCGATTCGTTACAATTCCTGTCGGTGGAGATCTCTCAGAGGATAAGGAGTTGAGCACCA ACAAGACTTTATTCCAAAATCTCATTCCATTCC…	DAF42327.1
192	c123678_g1_i1	611	99	1.13	Mononegavirales	Rhabdoviridae	ssRNA (-)	unassigned	[Glehnia littoralis virus 1]	GlLV1	Asymptomatic plant	224	1	157	70.09	146.4	2e-34	97.21	87	GGTTTAATAAAACTAGATAATATGTGAAATACACCGGAAATAATCGTATCAACTATTCCT TATAAGATTGGCCATGGAAAACTCTTTCTCTTTCAAGATATGTACTGAATTAACAACTGC ATCAGAGGGCGGTTCGATAGCTTTGACTAAGAAGTTGAACTTTTGGCAGATGTTGAAAAC GCAATGGGCTGAGAACATTCGGATCCGAAGGATTCTATTTATTTATGAACCGAGGGCCGG AGAGCTGGGTCGCGGGCAGGTCACAGCGTCTATCATCGATAACCGAATTGATGAAGATAT AGACAACATTGTAATAAGAACAATTACATTTGACGCTCGACAAAAAGTTCATCTGACTTG GGAACATGAAGTCCAACTACACGTTGGAGATTT…	DAF42323.1
193	c127903_g2_i1	609	153	1.76	Mononegavirales	Rhabdoviridae	ssRNA (-)	unassigned	[Glehnia littoralis virus 1]	GlLV1	Dwarfed plant	412	157	346	46.12	205.7	2e-52	97.33	92	GCGATGAGTGACAATACTGTTGAAGAAGAAGAAGATTTCAGCGAAGATGTAAAAGCATCT TTTTACTCGTTCGTTGCAGGTTACTTCATGAGAGTCCAAGCTCGACAAGTGGACAACGCC CATACCAACTTTGCGAAGAGCAAGGACAGATATGGCGGCTGGTATGATGAAGGTATGGAT TTGTTTGATAGAAGTGAGATCCCGAAAGAATCTGTAGAGAAACTCAAGGCAGTGATGGCA AGGAAGCCAGAGTTGACTGGTACATGGGTTATGTGGTTGGCATATACCGAGAATGAAAAG GAGCTTGCCAAGCAATCAAGAGGTTTATTAGAGTATATAGGGTTGCAAATATTTGCATAC CAAGGATTGCACATCATGAATCAACTATTAACT…	DAF42321.1
194	c130765_g1_i1	589	94	1.14	Mononegavirales	Rhabdoviridae	ssRNA (-)	unassigned	[Glehnia littoralis virus 1]	GlLV1	Dwarfed plant	2068	1565	1759	9.43	69.3	9e-11	90.77	99	CAATCCCTACTCCATGCAGGGTCGATTATGTTGTTAGATTTGTTGATCATCAATTTAGAATTGATCTTATCAGCTCTGTATTCCATGGAGAGGGGACAAACATTGTGCACGTATGTCTGAGGTATGGCATCATCGGGGTTGAGAATAGTGGAAATAATTACAGAATCAGCTCCCATTGCTGCAAGAATAGAGCCAGATGAACCTAACCCATCTCCTACGCAGAAAACGTGCTGTCGATATAGCTCTTTTCTTATTAGATTGTAGATGTCAGAGCATTTATACCATGAAGAGGTAGGTAGACTTTTAAGAACCATGAGGGAATACTTAATGAGCTTCTTCGGTGGAATATATTGATATTCTAGTGTGCTGATTTGATATCCTCTCGATGATGCCCTCATC…	DAF42327.1
195	c131580_g1_i1	452	43	0.81	Mononegavirales	Rhabdoviridae	ssRNA (-)	unassigned	[Glehnia littoralis virus 1]	GlLV1	Asymptomatic plant	2085	1013	1162	7.19	198.4	3e-50	92.67	99	AGGGTTCTCCTGAATAGATGCGTCCGCCTGCACCGATAATGACCTTTTCCTTTGTAGTAC TACCCAAGTATGGCGGATTCCCCCCGATGTCTAAATTCCACATATCATTTATGAGTTGCC CGTCTGGATAATGCACCGACATATAACCATCTTTGCACGTACATACACCTTTGTCACCAC AATCTGATCGAACCATAAAGGATGCAGGAAATGGGGTTGTTACACCTCTTAGCTCTTTTC TCCATCCTTCTCGTCTCATCCGTTTACATCGATCGGTTGGGCATTCATTTTCAAACGGTG TTCGTAATTGTACACATCGCCAACGGAAAAACCTATGGAAGTTAATCTCATCTCTCTCGA TATAATTGAACACGGCCCCGCGAGAGTCATTAA…	DAF42327.1
196	c128171_g1_i1	436	58	1.16	Mononegavirales	Rhabdoviridae	ssRNA (-)	unassigned	[Glehnia littoralis virus 1]	GlLV1	Dwarfed plant	2068	1172	1309	6.67	160.6	1e-38	96.55	99	TGGAATCGCATCCAGAGCTTTGAGACTTTCCACATCTTTGAAGTCTTCTGGTATAGGTTGAATGCAATGGTAACATACTTGCTTAAAATGATCAAATCGTGGAACTATATTTCCCTCTCTAAGTGATTTACTTATCATCATATTAGATGTTTCGAGAATGTAGCAGAACAAGGCTTGATAATGAATGTCTGTATTCTCTGATCCCTTAGAGTATCTCACAAAATTGTCTGTGGATATGTGATATCGCGTGGAAAATAAGAAGTTGCTACTTGTTAATGCCCCATGGGTAGTGCTCGAGTCCCGATATCTGTGTACTTCGGACCCTGCTGTGCCCTCTGACACTCCTTGATAAGGTTCTGGATCCATGTCAGTGACAGCTCTTACACAGGATTTGATAAT…	DAF42327.1
197	c130765_g2_i1	407	42	0.96	Mononegavirales	Rhabdoviridae	ssRNA (-)	unassigned	[Glehnia littoralis virus 1]	GlLV1	Dwarfed plant	2068	1773	1848	3.68	54.7	2e-06	85.19	99	CCTCCGCCTGATGGAGACATTATCCGTATTTTTTCAGCCACTGTTTGATCTATCATTTCATCTTCATACCGGCTCTCTAACTCTCTCTTTATTTGTCCCCATGCTCCTAAGCAATTTCTCCAGTCTATAAATGCCCCATCTCCGTTTAGATGCATTTTTTTGGCATTGACTCCATGAATTATCCACCATACTTCTGGATAAAATGACGATCTAAACCTAGTCGTGACTAATCTCCAGGACACGCAGGCACTGCTCATACTCCCTATCCGATTTGTCATCTCAGCCGGGGAAAAGAGATAGTCTTTAATTAGCGCACAATTCCAATCTTTGAGGGTCAGCAATTTCTCAAAAATGATCTGCCTTTCTTTCTTTGCATCGAAATCTGTGACTTCTATGTCA…	DAF42327.1
198	c118511_g2_i1	399	10	0.24	Mononegavirales	Rhabdoviridae	ssRNA (-)	unassigned	[Glehnia littoralis virus 1]	GlLV1	Asymptomatic plant	2085	251	373	5.9	152.1	2e-36	91.73	100	CAGTTTCGTTTCTAAGAGAGTGAAGCTGCCTTCACGGATCTTTGGAAACCGTCCATACTT TTTCTGATATTCCTTTGCAAACAGATATTTGAACATTCTCCCAGCATCTTTAGAAAGACT ATCATCCTTTATTATGTTTTTCCTTCCTATGAGCATCAACTTCTCCATTCCCTTTCTGCT GTCAACTGTAGGATGGCCCCAAACTCTATGCATCCCATAAACTTGAGATACGTGGTGGAA GCTATCTATCCCTTCGAGAAGTGAAGCCAATCTTTTACCATATGCAAAAAATTCAGGATC ATCGTCTGCTAGATCCGTCATTGTGTTGTGGAGAAATCTTTGACTGTCGACTAAGGAGCC TTCACCTCGGGTTTGAAGATGTCCGATGACCAA…	DAF42327.1
199	c137947_g1_i1	393	82	2.01	Mononegavirales	Rhabdoviridae	ssRNA (-)	unassigned	[Glehnia littoralis virus 1]	GlLV1	Asymptomatic plant	311	29	156	41.16	80.9	6e-15	89.23	99	TTGGATGTTTTGTTTGCCACACTGAATAAATGCTTTGATTCCGACTTCAACTCCGAGACA GAATCAGTGATGGCAGCTAAAACACTAGTATTGTTCGCTAGGGAAATTCCTCTAACATAC CATATGATATGTGATTCATCAATCGCTTCTGTCTTAGACATTGTCTTGATCTGATTCTCC ATCTGGATTGTTTTGTTTACCCCTAACGCGGAGCATACCTTTTCCAAGTGTTCGAGTGCA ACTTTGGCTTCTAAGCTCAGATGTTCTGATGTTGGTTTAGAGACATCTTTTTTGGTGGTT GGAATATCGTTCAGATTAGAAGTATCAGTCTGATCATCAATCTGATTAGGATCGAGAGAA TTAGGAAGAGCATAAGCAACAATAGGATCTCCC	DAF42322.1
200	c113369_g1_i1	383	51	1.32	Mononegavirales	Rhabdoviridae	ssRNA (-)	unassigned	[Glehnia littoralis virus 1]	GlLV1	Dwarfed plant	2068	1469	1593	6.04	74.3	1e-12	96.06	99	GGAAACAGCACAAAGAGTTAATGTTTTCCCAGAAATGATAACTCCAAATACAAACCCTGTCTCGATAAGTTCTGCATGTCAAGCAATGCGGTCGAATATACTCTCTTTATCTGTCAACAGAAGATGGAATATGGGTCCTCGATGCAATATCGTTACTGAAGATGAAAAGTATTCTTCGGTGGTGTATAAGATGATTTTGTCTGAATGGATAGAAAGAAAGACCGACTGTCCTGAATGCCATATATCCTGTGATCTCATGAATGGGAGAAACCTCGAATGGGAAATAAAGCATGCTGTCTGCAGAAACGGTCATATTTTTTGGGATCGAATGCAAAGGTATCCATGGGTAAGATCTAGTGTAACGGTAGAAAGGCTCAGAAAAG	DAF42327.1
201	c114455_g1_i1	315	28	1.14	Mononegavirales	Rhabdoviridae	ssRNA (-)	unassigned	[Glehnia littoralis virus 1]	GlLV1	Dwarfed plant	2068	1085	1188	5.03	127.5	1e-28	94.23	99	TAACAACCCCATTCCCTGCATCCTTTATGGTTCGATCAGATTGTGGTGACAAAGGTGTATGTACGTGTAAGGATGGTTATATGTCAGTGCATTATCCAGACGGGCAACTCATAAATGATATGTGGAATTTAGACATCGGAGGGAATCCGCCATATTTGGGTAGTACTACAAAGGAAAAGGTCATTATCGGTGCAGGCGGGCGCATCTACTCAGGAGAACCCTTGGTAAGGAGACCCATTACCCTTTTAAAAACCATTAATTGGTTTGTTCCGCCTGACTCACACACTGCCGAAATTATCAAATCCTGCGTAAGAG	DAF42327.1
202	c108941_g1_i1	311	17	0.71	Mononegavirales	Rhabdoviridae	ssRNA (-)	unassigned	[Glehnia littoralis virus 1]	GlLV1	Asymptomatic plant	546	190	292	18.86	141	3e-33	95.15	99	TAGGTGTAAGGCCTATGATCTTATGATCATCATCGAATATTCCGTCATTTATCTCTGAAA GGAAGATTTTGGGTCTCAACGTAGTATCTTCTAACCAGCGTTTCACACCTCGACGCTTGT CTGGATCCATGACAGTATTTCTCTGCTTAATCGATTTGATCAGCTCATTTTTAGTGGGAG AGATAGCTTTATCTGCAATTATCATAGACAGATTGAAAGATTCAGGGAGGTCGAATGTTT TGACAAAGGTTATTCTATCCCATTCGTCAAGAAGATGAGTGGACCTGTTGACAGCAGATA GATCATTATCT	DAF42327.1
203	c132250_g2_i1	266	14	0.91	Mononegavirales	Rhabdoviridae	ssRNA (-)	unassigned	[Glehnia littoralis virus 1]	GlLV1	Asymptomatic plant	560	387	477	16.25	64.7	3e-10	59.09	99	GAGATCCTACATTGCCTCACATGATCCCAGGAATATTGTGTTATAAACCTGGTTATCATG AGAGATTATCACTCATGCTAGAATCAGAGTCTTACGTCCTGGATAATGAACTGGCAATTC CGTCTAGCTCATCATATGCTCATAGAGCGTACACAACCATTTATAGCAGTTTATACCAGA GCGGGATACAGTCAACGATCACCGATCTTGAGAAGTTACAAACGACGCAATTAACATCAA AAGGTGACGGAAATAGGATAAGTGAG	DAF42325.1
204	c28806_g1_i1	265	23	1.51	Mononegavirales	Rhabdoviridae	ssRNA (-)	unassigned	[Glehnia littoralis virus 1]	GlLV1	Asymptomatic plant	560	340	414	13.39	53.5	6e-07	56.82	99	CTCTGACTCTAGCATGATTGATAATTTCTCATGATAACCAGGTTTATAACACAATATTCC TGGGATCATGTGAGGCGATGTAGGATCTCGTAACCCTTAAGTAGTGGAGCATACTACACT CATGCGTTGCATCTTCCATCAAATCAGAATCTGATTGGTAAGTTTGCAACCTGTTACAGT TTTGAATAATTTCACTGTACTATTTCCATATAATTTGTAACATTTCATCTAACCTCCGAC CATAGGGATCATAAATGATGTTACT	DAF42325.1
205	c135435_g3_i1	264	3	0.59	Mononegavirales	Rhabdoviridae	ssRNA (-)	unassigned	[Glehnia littoralis virus 1]	GlLV1	Dwarfed plant	560	396	449	9.64	45.4	0.0002	59.02	69	CATTACGTACCCTATCTCCGTCGCCTTCTGATGTTTCTTGTTTCGGTTTTGAATTTTAAA TTTTAAGATCGGTGATCGTTATTTTATCCCGCTCTGGTATAAACTGCTATAAGTGGTTGT GCACGCTCCATGAGCATATGATGAACTATACTAAATTACCAGTTCGTTATCTATAACGTA GGACTCTGATTCTAGAACGAATGATAATTTCTCATGATAACCAAGATTATAACACACTAT TCCTGGGATCATGTGGGGCAATAT	DAF42325.1
206	c33001_g1_i1	233	5	1.46	Mononegavirales	Rhabdoviridae	ssRNA (-)	unassigned	[Glehnia littoralis virus 1]	GlLV1	Dwarfed plant	560	318	388	12.68	52.8	9e-07	57.14	99	AATCAGTGCAGATTTCTATCTATAGAGTCTAAAGTGACATCATTCAGAGTCCCTGTAGTC AGAGTTTTGATGAAATGTTACAAATTATATAGAAATAGTACAGTGAAATGATGCAAAATT GTAACGGGTTGTGCACTCACCGATCAGATTCCGATTTGATGGAAGACGCAGCGCATGGGT GTAGTATGCTCCACTAATTCAGAATTATGAGATCCTATATTGCCTCACATGAT	DAF42325.1
207	c127903_g1_i1	229	12	1.29	Mononegavirales	Rhabdoviridae	ssRNA (-)	unassigned	[Glehnia littoralis virus 1]	GlLV1	Asymptomatic plant	482	421	477	11.83	62	1e-09	98.28	75	CAACATCAACACAAATCTTTACACAACAATCTCATTATCAATAACCATACATTACATCCA TATGTCTCCAGATTCCACGTCCTGAGTGTTCTGGTTGAGGAGCAGATCCACTAATTTACT TGCAGCATCATCCAACTTCTTCTTCAGAGAGTCCCCGATTTGCTGTATAGCATATATCTG CGTTGGATCAGATTTGGAGGCGGTGTCTAACTCCTTTACCACTTTAGCC	DAF42321.1
208	c102419_g1_i1	223	6	2.05	Mononegavirales	Rhabdoviridae	ssRNA (-)	unassigned	[Glehnia littoralis virus 1]	GlLV1	Dwarfed plant	224	7	79	32.59	81.6	2e-15	96.67	80	TTTCAAGATATGTACTGAATTAACAACTGCATCAGAGGGCGGTTCGATAGCTTTGACTAA GAAGTTGAACTTTTGGCAGATGTTGAAAACGCAATGGGCTGAAAACATTCGGATCCGAAG GATTCTATTTATTTATGAACCGAGGGCTGGAGAGCTGGGTCGCGGGCAGGTCACAGCATC TATCATCGACAACCGAATCGATGAAGATATAGACAACAATGTA	DAF42323.1
209	c73475_g1_i1	216	15	2.01	Mononegavirales	Rhabdoviridae	ssRNA (-)	unassigned	[Glehnia littoralis virus 1]	GlLV1	Asymptomatic plant	560	226	282	10.18	42.7	0.0009	70.91	76	TGGCTGTGTTTTTCATTTTTCGCAGGTTCATCCAATAATCTTTATAGGAAACCTTCTGCA GACAGCTTCAGTCCACTGCATGTCGGCTCAGCTGCGTTATCCGCGAGTCTTGTTAGGGTT ACAGAATACCTAACATCTGCGCACATATGGTAAGCGTTCCCATCTGATTCCCTTTTATTC ATCTAATTCGTAGGAATCATACGACTCAAATGGGCC	DAF42325.1
210	c94181_g1_i1	213	20	2.83	Mononegavirales	Rhabdoviridae	ssRNA (-)	unassigned	[Glehnia littoralis virus 1]	GlLV1	Asymptomatic plant	2085	1322	1391	3.36	65.9	1e-10	94.29	98	CATCAAGCAAACCGATAGAGACTGATGTTTCAGATAGGGTGCTCCCTATTATGTCAGATA CTATCCGATCACAGATAACATCTTGTAACCACTTCATCTTCTCATTTCCGCTCATGTTTG CGTATCCAGTTCCGTCCAAGGATGTCTCCGTGAGGTCTGATAACGGAGAGATGCGCTCCA AAACCCTTATTTTATCTTTAGTGACAAACAAAT	DAF42327.1
211	c117742_g1_i1	205	18	8.53	Mononegavirales	Rhabdoviridae	ssRNA (-)	unassigned	[Glehnia littoralis virus 1]	GlLV1	Dwarfed plant	2089	1941	2007	3.21	73.6	5e-13	92.65	99	ATACCATTCTAAATGCCAGCTCTGTGATTCATTGATCATTTTATATCTATCTTCCACATC CGCAAGCATTGCTACCCCCATAGCAAATACGATTTCCCTCAATTTATAATAATCAGAATC GTATAGCTTCAATCTTCCAGAGTCTCTTTGCATCTTCACATGTTCCGGTTGTTTGCTCCT CCTTAGGTATAAGAACATTTTTGTA	DAF42327.1
212	c74656_g1_i1	1386	253	2.96	Reovirales	Reoviridae	linear dsRNA	Unassigned	[Grapevine Cabernet Sauvignon reovirus]	GSSV	Dwarfed plant	697	338	682	49.5	64.3	2e-09	22.32	66	TGAGTACCGCGCGGCACGGAATTTAGATCCTCTCGTCTCAAAAACGAATGTTGAGTTTAG TAACATGGATATCTATTCAGTGAGAGCTAGAGCACAGACGATAGTTCCAGGAGTTGTTAA AAAGAAGGTTGGGGCTTTTAAAGGATTCAAATTCTCAAAAGGACATTCGGTACTAAATTT TGATCGACAACAAGCAAAAGAAAGGGGTCTTGTCAATCATGCTTTTATTCCCATCTTACT AATAACCCCAGTCCAAACAGGATGTTTATATTTAGCTAATCTCACTATCTTCTCAAACGA TGTTACTTGTGCCAAATACGTTGTTATCGATGAAAGTGATGTCATCTCCCATCTCATCAT TGTGATTGTTGAAAACTGCTCAGCGCAATCAAT…	AKB94060.1
213	c15265_g2_i1	888	88	1.78	Reovirales	Reoviridae	linear dsRNA	Unassigned	[Grapevine Cabernet Sauvignon reovirus]	GSSV	Dwarfed plant	1239	35	255	17.84	125.6	4e-28	35.68	75	CAGGTTTCATTCCACGCTCAGATGATTTCGATTCTTCCCTTTTCAAAGCATTACGAAGTA ATGATCCTATTTCGGACGAAGATCTGCGCACATTGGTAAGCAACTTTCAGACAACAATAA CCTTACCCGTTCCAACTTCAGAAGAGACATATTTAAAACATTCTCTAAAGTACAACGTCA TGTTAGCTTGGATTGGCAGAGCAAATCGTTTTCTCCAGGAGCCTTGGTTTTCTTGTTCTC ACAAACCGTTGAATCTTTGCTATTATGATACTGAGAAAGGATTAGACAAGTTTTTCGTTG TTTTGAAGGAAACTGGTACACTGCAAAATTTCTTTGGCTGCCCCTGTTTCATTCTTCCAA GTGTAAGTTCAATAGATCTAGTACCTATAATGC…	AKB94059.1
214	c103856_g5_i1	794	73	1.71	Reovirales	Reoviridae	linear dsRNA	Unassigned	[Grapevine Cabernet Sauvignon reovirus]	GSSV	Dwarfed plant	1052	582	841	24.71	147.9	7e-35	31.56	99	TAAAATTAAGCGTCCCAATGTCAAACAAGCTCTCCAACGATATATATGATATCAATGCTC AGTTGGATGACCTAGAAAATGAATTATCATCAACAAAAACGGTTGCATTGAGAGCTGATG AACGAAGTCTGGCAAACTCGTATCGGATAGATAAGATTGAGGCTAAATTAAATGAGATGG ATGATATGGCGATGATCGAGTTTGGAGTGTCAATGCTATCAATGTTTGCTCCAGTAATAG GACCACTCACCATTACTATGTTTAAAGTCCTGAATAGATTAACATCTCGAATGGTAGGAT TGAGTGCCCAGTTACTTGGATCAGCAATGAAAAAGTCGTCTAAGGTTGCTCTCTTCTTAA AGATGCAAAAGGGTTATTATGACGTAGCATCCG…	AKB94055.1
215	c112578_g1_i1	266	51	3.31	Ortervirales	Caulimoviridae	circular dsDNA,RT	Badnavirus	[Gulupa bacilliform virus A]	GBVA	Asymptomatic plant	1970	255	339	4.31	100.9	3e-21	68	98	CTGAATTCGTACCATCATTAGTCCTACATGGATATGTTGTAGTCCTTCTCTTCTGAGTCT ATCAAGACTCTGTCGGTTTATGAACCTTCGATCCACCTGAGTGCCCACTCCTGTGCAGAG AATTCTTTCCTCCATGTAGTGTTGGTAAACACGTCTTACTCCTGTGTCTACCCAGTTATC CTGGTACAATGTTTCTGCTGGAACTAGGTTTGCCCTTCTTTGGTGAGACATCCTTAGTTC TTCCTCCGGGTTTAGTTGTTGTTCTA	UTS84203.1
216	c83871_g1_i1	264	0	0	Ortervirales	Caulimoviridae	circular dsDNA,RT	Badnavirus	[Gulupa bacilliform virus A]	GBVA	Dwarfed plant	1916	1684	1770	4.54	146	9e-35	76.74	97	AATCCACGATCGATGCAGAAATATACGCCTGTATGGAAAGTCTACAATCCTTCAAGATTC ATTACTTGGATAGAAGGGAAATAACTATCCGAACAGACTGCCAGGCGATAATCTCATTCT ATAATAAGTCCAATCAAAACAAACCTTCAAGGGTTAGATGGATTGGGTTTACGGATTTTA TAACAGGAATAGGAATATCAGTCCATTTCGAGCACATAGAAGGGAAAAACAATGTTCTGG CAGATTCACTATCAAGACTAACAA	QNH81994.1
217	c131021_g2_i1	591	15	0.54	Tymovirales	Betaflexiviridae	ssRNA(+)	Chordovirus	[Hogweed virus 4]	HV4	Dwarfed plant	338	1	151	44.67	246.1	2e-64	88	76	TAAATCTAAGCATCTAATGAAAGGCTCATCTGTTAAGATCTTGGAAGAAGTCATTGACTG TTACTCTGATGGTGTTTGACTCTCTGAGCTTTGTTAGTTCCTTTAGGTATAGGTAGCTAG TGATTTTATAGTAGTTCAGGATGTCGTTGATTGATGTAAATAAGTTTTGCTCTCTTGTTT CCAAGGGTCAGTCTTCAGTAGAAGCTATTTCCTCATCGAATATATATGGGGACGCCAGTT GGCTTAAATTAAAGACAATTACGGCCATTAGGAAATTCGAGTCTAACATTAGTCTAGAAC TAGAGGAGGGAGACAAAGACCTGATAGTTCCGAATATACCTCTTATTTCAGATTCTGAGA TAAGAGCTGTTCGAAAAGGGATGCCAAATGTTA…	YP_010805453
218	c109432_g1_i1	209	7	3.07	Ortervirales	Caulimoviridae	circular dsDNA,RT	Caulimovirus	[Horseradish latent virus]	HRLV	Dwarfed plant	121	16	83	56.2	45.8	0.0001	42.31	99	AGAAGAAATTCTTAGGTTGCTTAGAAACCAATCTGCTTTAAATGTTTCTAATAACATTGA AGCATCAACGGCGAAGATAATCATTCAGATTAAGTCAGTAATTCAGGACAACCCCTGTAA CAAAGAAACTCTAGAAACCCTTGATAAGGAACCTGGAGAAAAACAAATCGTCTTGAAACC AGACGATAAGGATATTCCTAGGACTAGTA	QED42843.1
219	c121277_g3_i1	422	159	3.4	Martellivirales	Bromoviridae	ssRNA(+)	Cucumovirus	[Hydrocharis dubia cucumovirus]	HDCV	Asymptomatic plant	218	1	106	48.62	211.8	2e-54	97.12	98	TCTCATGGATGCTTCTCCGCGAGATTGCGTTATTGTCTACTGATTATATAGAGAGTGTTG TGCTGTGTTTTTCTCTCTTTTGTGTCGTAGAATTGAGTCGAGTCATGGACAAATCTGAAT CAACCAGTGCTGGTCGTAACCGTCGACGTCGTCCGCGTCGTGGTTCCCGCTCCGCCCCCT CCTCCTCGGATGCTAACTTTAGAGTCTTGTCGCAGCAGCTTTCGCGACTTAACAAGACGT TAGCAGCTGGTCGTCCAACCATTAACCACCCAACCTTTGTAGGGAGTGAACGCTGTAAAC CTGGATACACGTTCACATCTATTACCCTAAAGCCGCCAAAAATAGACCGCGGGTCTTATT ATGGTAAAAGGTTGTTATTACCTGATTCAGTCA…	QKI28870.1
220	c146594_g1_i1	5024	28738	82.47	Tymovirales	Betaflexiviridae	ssRNA(+)	Betaflexivirus	[Iris domestica betaflexivirus 1]	IDBV	Dwarfed plant	1857	8	1833	98.33	523.9	3e-147	86.16	97	GGCTAGGCCACCCCAACCCAAACAAGATCAAGATAAGCAAGCATGGCAACGGTCTTCGTA CGAAGATCCCCTCTACAAGAGGTTCTGTCGATACTTCCATCTGATCAAGCTTTGGCTTTA TACACTCAAGACCACAACTCCAACATCCAGACTGTTTACAATACCGCGCAAGACCTTTAT AGTTACCCGGTTCCGAAAGATCAACAGGAGAAGCTCATAGCCCTTGGAATCAATTTGGCT CCATATTCCTACAAAAGTCACCCGCACCCTTTCTCTAAGATGCTCGAGAACTTCCTTCTT TACCAACACGCCCTGCTTGCTCTAAGGAAATTCAAGAGGATTCACATCACCTCCATCAAG GATGAAAAATTTGAGAAGTTCAAGAGCACCTTC…	QQG34671.1
221	c143987_g1_i1	5023	18895	18.25	Tymovirales	Betaflexiviridae	ssRNA(+)	Betaflexivirus	[Iris domestica betaflexivirus 1]	IDBV	Asymptomatic plant	1857	8	1833	98.33	521.9	1e-146	85.35	97	GGCTAGGCCACCCCAACCCAAACAAGATCAAGATAAGCAAGCATGGCAACGGTCTTCGTA CGAAGATCCCCTCTACAAGAGGTTCTGTCGATACTTCCATCTGATCAAGCTTTGGCTTTA TACACTCAAGATCACAACTCCAACATCCAGACTGTTTACAATACCGCGCAAGACCTTTAT AGTTACCCGGTTCCGAAAGATCAACAGGAGAAGCTCATAGCCCTTGGAATCAATTTGGCT CCATATTCCTACAAAAGTCACCCGCACCCTTTCTCTAAGATGCTCGAGAACTTCCTTCTT TACCAACACGCCCTGCTTGCTCTAAGAAAATTCAAGAGGATTCACATCACCTCCATCAAG GATGAAAAATTTGAGAAGTTCAAGAGCACCTTC…	QQG34671.1
222	c70449_g1_i1	285	15	2.34	Mononegavirales	Rhabdoviridae	ssRNA (-)	Cytorhabdovirus	[Ivy vein banding virus]	IVBV	Dwarfed plant	2068	467	560	4.55	155.6	1e-37	90.32	97	TGTGAGTTTCCTGCTCCCTTTGATTTTTGATGATTGTGATCTAACATTGGTATACATCTT CTTAGTTAGGTCCAGTTGGTTATCTGTCATAGTGATTTGAGGGAAATGGGGTAAGATATG TTCAGATAACATTGATTCTGTGATCACGACATATACTCTCATGAGATGAGACATAAGCGC AAACATTCTCGGTGTTGGATTCATTTCCCTTTCTTTAGATCTTAGTCCTATGATCCTGTG ATCTTCTGGGAATTTGCCCTCATTCACTTCAGCTAAGAATTCTCT	ADA68872.1
223	c156311_g1_i1	421	4	0.09	Tolivirales	Tombusviridae	ssRNA(+)	Betacarmovirus	[Japanese iris necrotic ring virus]	JINRV	Asymptomatic plant	888	320	453	15.09	248.1	3e-65	94.78	95	GAAACCACCGCAAAAACCGAAGGTGCACATATTCCATAATCTGAAATACTTTCGGAGGCG TTTGTGTAATATCGTTGGACCGTATACCCCGATCGAAAGGGAGGAATACCCTAACTTGTA TCAGGGCAGGCGTAAGGCGATTTACCAAAATGCATTGGAGAGTTTGTCAGATAGGCCATG CACAAGGAAGGATGCCAAGTTGAAAACATTTGTCAAAGCTGAAAAGATCAACTTCACCGC GAAGGGGGACCCAGCTCCGCGAGTCATTCAACCAAGGGATCCCAGATTTAACATTGAAGT TGGTAAGTACCTCAAAAAGTGTGAGCACCACATTTATCACGCAATTGACACTATTTGGGG TGGGCCAACTGTTTTGAAAGGTTACACGGTAGA…	AFL55711.1
224	c155475_g1_i1	305	2	0.09	Tolivirales	Tombusviridae	ssRNA(+)	Betacarmovirus	[Japanese iris necrotic ring virus]	JINRV	Asymptomatic plant	352	313	352	11.36	55.8	1e-07	88.24	33	CACCTCTTGGTACTGGGGTTGGAGGAGAGGCGCAAATCGCAATTGTCCGATCACCACACA GAGGCGGAACTTTCACTGTGGGAATTAACTCCCCATCAGACATACCCACCGCCTTTGTTA CCCGCGCCTAAGCCGGACCCATCCATCCTTCTCGACGGGACACCAATGTCTTCTGGTATA GTAGCCAGTCGTGACCTCGCGGATGATCTTCGCGTGCATTGGGGGAGAAGCAGGGATGGG GAGGGCTATAGGCAACGCTTGGTGGAGGTTGAGAATCTTGTAGCGGAGATTCTAACCAGT TGGAT	AFL55714.1
225	c148224_g1_i1	248	5	1.19	Tolivirales	Tombusviridae	ssRNA(+)	Betacarmovirus	[Japanese iris necrotic ring virus]	JINRV	Dwarfed plant	76	37	76	52.63	62.4	1e-09	88.14	71	AGCGGGCTGTTGCGAGGGACGCAGCTCTTACTGCGACTCGTAATGCTACTGGTCGGGAAG TTGTTGGTGGCGTTTGGACCCAAGTGGCCGAGACAATCAACAACACAAACCACTTTCATT TCTGAGCCCCTCTGGGATAACGATATACTCATCATACTGGTACTAGCTTTAACGTTCACT TTGATATATATATTTGCTCAACAACAACCAATCTACCATCACTACCACACCGACAACAAC CTCAAGAC	AFL55713.1
226	c151234_g1_i1	214	1	0.4	Tolivirales	Tombusviridae	ssRNA(+)	Betacarmovirus	[Japanese iris necrotic ring virus]	JINRV	Dwarfed plant	888	267	336	7.88	123.6	4e-28	90.14	99	CACCGTCTCTCGGGAAAAACCGGCCTCAAAGGAGCGGAAGATTTACCAAGTCACCGGTCT CGACAGTGGATTAAACTTCGGCGTGCACAACAATAGCATCAACAATTTGCGCCGAGGTTT GGTAGAGCGAGTTTTCTATGTCGAGTCAGGTGGAATTTTGAAACCACCGCAAAAACCGAA GGTGCACATATTCCATAATCTGAAATACTTTCGG	AFL55711.1
227	c107696_g1_i1	569	59	0.75	Ortervirales	Caulimoviridae	circular dsDNA,RT	Badnavirus	[Jujube mosaic-associated virus]	JuMaV	Asymptomatic plant	1772	808	977	9.59	134	8e-31	41.07	86	CATGAATGAACCAGATAGTGACGCCATATGCTCTATATCAGAAGGAGAAGCACCAGAAGT AAAAGAAGAAGTAAGAATCGCCCTGATGAAGTTTCCTAATGTAGAATCGCTATTTGTTCT CCTAGAAGAAGGAGAAGCATCACCCTGGCTGCATAAGATTCAACTAACAGGGAAGCAAGG AATATGCAAGCACACATGGGAAGAGAATCAAGTAATCCAAGACGCAAGTTGGATTAATTG CAACTTCTGCAAAATAAGAACGAATGAAAGAATGAGAATTCACTGCAGTTTATGCAAAGT GACATCATGCCCTATGTGCTCAAAGTTTCAACTAAACTTAAAAATCAACCCAAAACCCCC AGAAGCAATAGTGCCTCAAAGCATGGAGCAATT…	YP_009408594.1
228	c139044_g3_i3	785	138	2.48	Ortervirales	Caulimoviridae	circular dsDNA,RT	Caulimovirus	[Lamium leaf distortion virus]	LLDV	Asymptomatic plant	517	53	168	22.44	67.4	1e-10	44.54	42	GTAGTTTTTCGGATGTTGAATATCCTTTATTCCTTGCGGAATTACCAAAGATTGCTCTTT AGATTCTTGTGGGATTTGAATTCCCCCATTGGGTCTCAGATTTAAATCCGAGGGTTTAAC CAATGTTGTTGAGGTCTGGACCTCAGACTGGATTTTTAGCAAATCCACAGCTAACGGGTT TGAACCGTCTTTACCTGAAACCGAAGGTTCAGGACTAGCTTCGTTTTTACATGTTTCCAT GCAGGGAGAAGTGTCAACCCTTTTTTGTTCAGCCTTATTTCTAAGACTTACATACTCTAG TTCCATGCGAACTAGCTCGAGTTTCTTTAGCAAGATAACTTCCTGCATCTTCAAACTTTC TATACTATCCATTAAGGGATAGTCTTGTAATCC…	YP_001931962
229	c142213_g3_i1	975	82	0.66	Ortervirales	Caulimoviridae	circular dsDNA,RT	Caulimovirus	[Lamium leaf distortion virus]	LLDV	Dwarfed plant	121	11	121	91.74	103.2	3e-21	50.42	35	GTAAGTTCGCAGCTACTTATCTTCAGATAGGGGGAGGAATTAGTAGATTAGAAGACATGA AAAGCCTTTTAGTCGAACAAGATGCTAAAATTAAAAAATTAGCTAAGCAAGAAGATCAAC TTAGTAAGTCTAAGAATGATTTACCAATAACTAGAGAAGAAGTTCTAGAAGTTTTAGGAT TTACCTCTAAGTTAAACGAAATCAAGGAATACCTTAACAAGATCTTAGGATGAGCCTTAA GGATTTTCAACAAAATTTCGATTCGATTATTAAACAACTAGATGAAATTCTTAGTTTGCT TAAAAATCAACAAAATACCGACAATGTTAAGAATAACATTGAAGCAACAGCATCAAAGAT AATCAATGAGATAAAAACCCTTATCCATGATTG…	YP_001931959.1
230	c73327_g1_i2	426	30	1.87	Mononegavirales	Rhabdoviridae	ssRNA (-)	Cytorhabdovirus	[Lettuce yellow mottle virus]	LYMoV	Dwarfed plant	2068	6	62	2.76	70.5	8e-12	59.65	40	CGGGAGTCAACTGTAATGTAGATCCAACTATGGTGTTAATAATCTGTGCAATTGTGAACC TTATCATAATATTACTCGGGATCAAGCACTGTCTTCGGCGTCGGAAAATCTCTGCTTTTA ACAAGGCTGCTTGGATGGCTTGATTTAAGAAAACAAGTGTTATAGTTCACCTGGAAACGG ATGAGAATTGCAATATAATCTATTACATCTTCCTATCAGACATGCATAACTCTTTTGATA TAACCGATAGAAGCGATGAATATGAGCCCAAAAAGAATAGATTTGATCCGTTGCCGGACT ATCATCTCCAGAATCCCCTATATTCCATACAAGGATTGCTTACGAAACATGAATTAAAAC AACGAGCTCCTATAAGGTTGAAGAAATCGTATG…	YP_002308376.1
231	c144403_g1_i1	3710	136241	180.84	Picornavirales	Secoviridae	ssRNA(+)	Stralarivirus	[Lychnis mottle virus]	LYMoV	Asymptomatic plant	989	3	989	99.8	1437.2	0	96.88	80	CTGCGAACTTTGTTACGATTTGTTACTTCCAACTAGCTATTGGGCTTATCCAATTTCTTT CGTTTCTGCAATCACTAGCACCGGGCTTATCCGGATCTCTTTTTGTTTTCTTTGTTACCT CTGTTCTGTGCGCGCTTTAATTTTCCTTTGCGTTCTTTACAGCAGTCACAACGTTTACAT TAAGTAATCTCGCTTCCCCGATTTGTCAAGTTAGGGGTTTTTGTTTTTCTTTTTTTGTTT CACAGCAAACTTTTGCTCTTTTCCTTTTCTTTCTGCTCCTCTGCTATATAGTTCTTCCTC CTTTGATTTCCAATATGTCTTTCTTTGGCAGACGCTCAACACAAGAGATGCCAAATGCTC CCTCCTATTCTGCGAAGGAGATGGAGGTGCTCA…	QXI69705.1
232	c146688_g1_i1	3685	153432	609.77	Picornavirales	Secoviridae	ssRNA(+)	Stralarivirus	[Lychnis mottle virus]	LyMoV	Dwarfed plant	989	3	989	99.8	1433.3	0	96.57	80	TGTTTCCGCAGTCACTAGCACCGGGCTTATCCGGATCTTTTCCTTTCTTTTCCTTTTTGT TTTCTTTGTTACCTCTGTTTCGTGCGCGCTTTAATTTTCCTTTGCGTTCTTTACAGCAGT CACAACGTTTACATTAAGTAATCTCGCTTCCCCGATTTGTCAAGCTAGGGGTTTTTGCTT TTCTTTTTTTGTTTCACAGCAAACTTTTGCTCTTTTCCTTTTCTTTCTGCTCCTCTGCTA TATAGTTCTTCCTCCTTTGATTTCCGATATGTCTTTCTTTGGCAGACGCTCAACACGAGA GATGCCAAATGCTCCCTCCTATTCTGCGAAGGAGATGGAGGTGCTCAAGGCTGCAATAAC TGAGTGTGGCATTAACTATGCCGATGTTGTTAG…	QXI69705.1
233	c143816_g6_i1	222	9	3.13	Durnavirales	Picobirnaviridae	linear dsRNA	Unassigned	[Lysoka partiti-like virus]	LPLV	Dwarfed plant	337	255	320	19.58	62.8	9e-10	54.79	98	ATTCTGTGCCAGGATACATTGCCAGTACCTCTTGACCCCCCGGCCAATAACATATATTCC GGCTGGTTTGGATAATGCAGTTTCGGTTGCTTGAACAGCTGGACAAATTCCAAAGTAGTT CACATTGAAGTGACCTGCAACCGGACGTCCAGCGGAGGTGGCTGTTTGGCCCCCGGGAAT ACCCTTCGGAGCATCAGCTGAGGCGAGAGCATTGATTGTGGC	AWV67014.1
234	c109494_g1_i1	220	3	0.37	Geplafuvirales	Geminiviridae	circular ssDNA	Begomovirus	[Merremia leaf curl virus]	MerLCV	Asymptomatic plant	375	15	68	14.4	68.6	2e-11	60	75	TTTTCGTGTAACTCTCTAGAAACCCTGGCGAATATTTTGTTTGAAGAACAAGAAATGTTT TTGAGTAGTTCCATTGTTGTTTGTTTATCAATGAAACATCGTGAATATGTGAGAAAAAGG TTTTTGGCAGAAAGGCGGAAACTGTTTGGTAGGCGTGGCATATTTGTAGGCGTGGCATAT TTGTAATTTTGTAGGTAACACCGATTGGGGGCTCTCAAGA	ABG90906.1
235	c101373_g1_i1	2018	59832	456.46	Reovirales	Reoviridae	linear dsRNA	Fijivirus	[Oat sterile dwarf virus]	OSDV	Dwarfed plant	583	17	538	89.54	76.6	5e-13	23.23	48	TATTTCCATTTCACACAAACTTAGTTTAAAAAAGAGAATGAACATACTATTTATATAAGA TGGATAAAGCTTCATATGTACCAAACTACAGTTTACTATACCCCTTATTTTTATTAAATA AGACAAACAACAAAAAGATTAACATAAATGCATTTTACAAGAACTTAAAGATTAACAAAG TGAATTTTGGAATCAACCCAGACCTTCTTACCTTAACTTCTGAGTTTGATAAATTCTTCT TAGATCATTTTGGTCAAGCTAATGTTGATGAATATGGACTGAATTTTGATAATCTTCTCA AAGTGATTTTTCGTATGCGAAATATAATTACGACTAAACAATCAAATTTTGGAGCCTATT TTACCACTTTTAATTATCTTGGAAGAATTGGTT…	YP_009507769.1
236	c125685_g1_i1	1975	44976	118.21	Reovirales	Reoviridae	linear dsRNA	Fijivirus	[Oat sterile dwarf virus]	OSDV	Asymptomatic plant	583	17	538	89.54	76.3	7e-13	22.95	49	GAAGGGGACTCGAGTCCCACCTGAGGCAGACACTGGCCGGTAGCATAACCAATGAAAGGG ATGACCCCCATAATGGGCTTTGACACGAGTAAACAGGGACTATAAATACAGAATCGAAAG ACTCCCGGTTTTCAAAACACGGCCTACCATACTGGCGCAAGGTAGTATTTGGGGACTAAT CACCGAATACCAAATCACGCCAAATCTTTTAGGTCATAATCAATTAAAAGCTTACATCTT AACAACATTTCGTCGCATTGAGCGTTAGTATTTCTCATCTGATGATAACAATCCTCAAGC AAAGGTTCAACCATTCGATCAATCGCAAATTCATCATTTCCATCTCTTCCTATTAATATA TGGCTAGTGTCATAATTAGGTCGAACATTAATA…	YP_009507769.1
237	c142883_g6_i1	672	97	0.97	Martellivirales	Virgaviridae	ssRNA(+)	Tobamovirus	[Opuntia virus 2]	OpV2	Asymptomatic plant	356	227	314	24.72	170.2	1e-41	85.23	91	CAGGCAAAACGGCATGGGCACGGTCACTTGGCCGGCACAATTATATTTCCGGCCATTTAG ATTTTAACAAAAATACATACAGCAACGATGTGGAGTATAACGTCATTGATGACATTACTC CAAAATATTTGTCAATGAAGCATTGGAAGGAATTAATCGGGGCCCAGCACGACTGGCAAT CAAACTGCAAATACTCGAAGCCCGTGCAAATAAAAGGTGGAATACCAGCTATTATATTAT GCAACCCAGGGGAGGGGACAAGTTATTGTAAGGCTTCTCATCTACATGTTTTAATTCAGT TCGAAGGGAAGATTCAACTGTATAACCAAAGGCACTTCGACATTCACGCGCCTGGTTCCC AGAATCATTTTCATCCTAACATCCAAGGGGCCA…	QTT61868.1
238	c105906_g2_i1	262	6	1.2	Durnavirales	Partitiviridae	linear dsRNA	Unassigned	[Panax cryptic virus 4]	PCV4	Dwarfed plant	337	89	169	24.04	72.4	1e-12	51.76	97	TAACAGCCTTCGCGGTATTCTCGAGAGCTATAGCATCGCTGCTAGAACTGCTCGCATGAA CAACAGAGCTCCTGTCAATTCCAGAATGGAGTTTCCAACCTGGTTCTCCTCTCTTCTGAG TTCAATTGGTCCCCTTGACATCCCCGACGGCCCCGTCGAAATGAAATTCCTCTATGCCAC CACCGCCGCTACTGCTGCTCACTATGGTCGCAATAATGCTCCCGTCAATCCTAATGAGCC CTACTGGGCAAGATTGAAGAAT	QRG29206.1
239	c142883_g7_i5	2978	1092	1.83	Geplafuvirales	Geminiviridae	circular ssDNA	Citlodavirus	[Passion fruit chlorotic mottle virus]	PCMoV	Asymptomatic plant	296	5	197	65.2	181.4	2e-44	45.08	19	ATAGCAAACGGCAATGATGGACGTCAGGACAGGAAAAGAAATAACGGAAGCAAAGCTACA AAACGGAGTTATGATTTGGACCGTCAATAATCCCTTGTATTTCAAAGTGGTCAGAATTTT AGAAACGACAGGCTTCCCAGTGGCAAATGTCATAGATTTTGAAGTGTGGATAAACAGCAC TTTGAGAAGAAGGCTAGATCTTCACAAGTGCTTCCTCAAATTCAGAATTTGGACATCAGT GACGCCTTCAGCTAAAGGCTTTCTAGACAGATTATGTTTTAGTGTAAATCAATATTTAAA TTCGATGCATGTTATTTCAATTAATTTAGTTTTATTAGCGGTAAAGAATTTCTTAAGTAA ATATGATCGGTACATATTCAGTGTAATCGAGAC…	YP_009553195.1
240	c146320_g2_i3	2056	423	3.16	Geplafuvirales	Geminiviridae	circular ssDNA	Citlodavirus	[Passion fruit chlorotic mottle virus]	PCMoV	Dwarfed plant	296	5	197	65.2	178.7	1e-43	44.04	28	TTTCTTTTCCTTTTTAACAATTTTTTTGTGGCCCTTATTTACTAATTGATGAATAGATTC CTAATCTGCTCGATGCTATTAATGCGGAAAAGGAAGATTCCAATTGTACGTTGTTATTGG TAGAATGGGAGTCAGCTATGACTTTCGCTGTAAATTTATCTCCTATAGATTATTAGAGTT TGATATTAAATGATATATATATAAGCATCATCGTGTACAATTCACATAAACTTAATTCTT CATACCGGAAACTATGGATTCGGATATGGTCACGGATAAGTATCACAAATCAAAGAGATC TGAATATAGAATATCCAGTTCCTATCAGACAATTGGTATGCAGTTCCCCTCCCTCCCGTC TACCGCATATCATTTTCTTAAAAGGAGGTGCCT…	YP_009553195.1
241	c121478_g1_i1	1051	45	0.74	Ortervirales	Caulimoviridae	circular dsDNA,RT	Badnavirus	[Pelargonium vein banding virus]	PVBV	Dwarfed plant	1970	515	780	13.5	215.3	5e-55	54.35	60	GGGAGAGCCAAGCGGGAAATATGACTATTATGTGAAATATAGTCCAACACCACATGCCCA CATACCTCAGAAGGAAATCATTCCAACGGGATGGGAATCAGACGACGAACCAGAACAAAA TAAGACGCATGTTCGGGTAGAAGAATATGACGAAAGACCCAACAACGAGTGCGTATCCTA TGGCCCTAGGAATGCCAAACAACAGCTCTATACGGATGAAGTCCAAAAGTTCCTGCCAAA AGACTACGATAATGATGAACAAGATGAGGAGCTAGTAATGATGGCAGATTCAGAAGATGA GGACGACACCATCGGAGTTTTAAAGTTCTGGTCCAGACAATCAGAAAGGTTAGAACCTTC GAGGGAGGAAGCCTTAGTTGTTTGGGACGAGGA…	ERN20006.1
242	c125847_g1_i1	782	45	0.36	Ortervirales	Caulimoviridae	circular dsDNA,RT	Badnavirus	[Pelargonium vein banding virus]	PVBV	Asymptomatic plant	1970	515	725	10.71	132.5	3e-30	45.39	51	CGACGAACCAGAACAAAATAAGACGCATGTTCGGGTAGAAGAATATGACAAAAGACCCAA CAATGAATATACGCCTTATGATCCTAAGCAGGCCAAACAACAGCTCTATACGGATGAAGT CCAAAAGTTCCTGCCAAAAGACTACGATAATGATGAACAAGATGAGGAGCTAGTAATGAT GGCAGATTCAGAAGATGAGGACGACACCATCGGAGTTTTAAAGTTCTGGTCCAGACAATC AGAAAGGTTAAAACTTTCAAGAGAGGAAGCCTCAGTTGTTTGGGACGAGGAAAAAGATGA AGATGATAAATGGGAAAACCCATTTTTTTTGAAGGATGATGGGGATGACCTTTTGAAAGA TCTAGCAAGGGGAGGAACACAAAAAGAAGAAAT…	YP_003208050.1
243	c103971_g1_i1	424	21	1.32	Ortervirales	Caulimoviridae	circular dsDNA,RT	Badnavirus	[Pelargonium vein banding virus]	PVBV	Dwarfed plant	2031	5	108	5.12	103.6	9e-22	51.06	66	AGGAACTATAACAGAACCCGTCAAGAAATCCAAAGGTCCATTCTACGTTTTTACAGATCC CCTGAAGATCTACGAAAACGAGAAAAGGAAATCCCAAAAATGAGAAGAAATCCAAGTATA AGGGAATCAGCAGGGGCAAGCACAACACAAGAGCTGCCTACACAGGAAGACCAAATAAGG GATTATCGATGGACAAATAGATTACAATTCAACATGCAAAGGAGACTGCCCAGACGATTA AGAAGCAGATATCGAAGAAGCCTGGAACAACAACTAAACCCGGAGGAAGAACTAAGGATG TCTCACCAAAGAAGGGCAAACCTAGTTCCAGCAGAAACATTATACCAGGAGAACTGGGTA GACACAGGAGTAAGACGTGTTTACCAACACTAC…	YP_003208050.1
244	c119361_g2_i1	381	19	1.48	Ortervirales	Caulimoviridae	circular dsDNA,RT	Badnavirus	[Pelargonium vein banding virus]	PVBV	Dwarfed plant	1970	1378	1504	6.45	212.2	2e-54	76.38	100	GATATCATTAACCCATATATCTGCATACAAGATAAGCCTCTGAAACACGTCACGCCTGCC ATGGAGAAATCATTCGATCAGCACATACAAGCTCTTCTGGAACTCGGAGTAATCCGAAAA AGCTCAAGCAGACATCGAACAATGGCAATGATCGTGCAGTCAGGCATAAGCACTGACCCG AAAACGGGAAAGGAAACAAGAGGAAAGGAGAGGATGGTCTTCAACTATCGTACTCTTAAC GATAACACTCATAAAGACCAATACAGCCTCCCAGGAATTAATACGATCATAAAGAAAGTT GGCAGCAGCCAGATATTCTCTAAATTTGACCTAAAAAGCGGATTCCATCAAGTGGCAATG GACGAGGAAAGCATACCATGG	GFA27391.1
245	c90195_g2_i1	285	2	0.31	Ortervirales	Caulimoviridae	circular dsDNA,RT	Badnavirus	[Pelargonium vein banding virus]	PVBV	Dwarfed plant	1970	245	334	4.57	103.6	6e-22	67.09	82	ATTAGTCCTACATGGATATGTTGTAGTCCTTCTCTTCTGAGTCTATCAAGACTCTGTCGG TTTATGAACCTTCGATCCACCTGAGTGCCCACTCCTGTGCAGAGAATTCTTTCCTCCATG TAGTGTTGGTAAACACGTCTTACTCCTGTGTCTACCCAGTTATCCTGGTATAATGTTTCT GCTGGAACTAGGTTTGCCCTTCTTTGGTGAGACATCCTTAGTTCTTCCTCCGGGTTTAGT TGTTGTTCCAGGCTTCTTCGATATCTGCTTCTTAATCGTCTGGGC	KAH0450859.1
246	c157024_g1_i1	249	10	0.8	Ortervirales	Caulimoviridae	circular dsDNA,RT	Badnavirus	[Pelargonium vein banding virus]	PVBV	Asymptomatic plant	1970	1461	1542	4.16	159.5	8e-39	85.37	98	CTTCTGTTCCTTTGAAGCATTCATCCATTTTTCTCTGGAATATTGCAGGCGCGTTCTTCA ATCCGAATGGCATTACTAGCCATCCATACAGTCCTCCTGGGACTATAAACGCTGTCCATG GTATGTTTTCCTCGTCCATTGCCACTTGATGGAATCCGCTTTTTAGGTCAAATTTTGAGA ACATCTGGCTGCTGCCAACTTTCTTTATGATCGTATTAATTCCTGGGAGGCTGTATTGGT CCTTATGAG	YP_003208050.1
247	c143331_g1_i1	1017	353121	2022.97	Unclassified	Unclassified	ssRNA(+)	Satellite RNAs	[Peony yellowing associated secovirus satellite RNA]	PYSV-satellite	Asymptomatic plant	331	14	257	73.72	224.6	8e-58	67.14	81	TGTGCTTTCTCCGTCTGAGAATTATGAAGCTATGGTTTTAAATAGCGATAACATTGTGAG GAATCTGCCCAAGCGAGTTCGGGTGTGCTCGAAAAGCACTGGGCGTTTCTTCACTGTAGG TCGGCACGATCTACACCTCTTGCCTTCTGGCAAGAGAGCCTGGGTTCCTCTTAGGAACCC CACTTCTGCAGGTGGAAGCTCTCGGAGGGAGAGACCACAAAGGGCTGTCACCAAACAGCC CGTTGTGCGGCCTATCCGAGCGCCTGTAAAGGTGGAAAACAGGTTTTCTCCGCTTTGTGT GGAGGAGAGCCTTGTCGCTCCCATTAAATCCAAAGTAACCTATGCCGATGCCGTCCGTGC AAAGGTATCGCCTGCCAAGGCCAAGAAGGGTGT…	QNN26215.1
248	c145063_g1_i2	1016	201941	3444.89	Unclassified	Unclassified	ssRNA(+)	Satellite RNAs	[Peony yellowing associated secovirus satellite RNA]	PYSV-satellite	Dwarfed plant	331	14	257	73.72	221.5	7e-57	67.14	81	CTGCGCTTTCTCCGTCCGAGAATTGTAAAGCTATGGTTTTGAATAGCGATAGTCTGGTGA GGAATCTGCCCAAGCGAGTTCGGGTGTGCTCGAAAAGCACTGGGCGTTTCTTTACCGTAG GTCGGCATGATCTACACCTCTTGCCTTCTGGCAAGAGAGCCTGGGTTCCTCTTAGGAACC CCACTTCTGCAGGTGGAAGCTCTCGGAGGGAGAGACCACAAAGGGCTGTCACCAAACAGC CCGTTGTGCGGCCTATCCGAGCGCCTGTGAAGGTGGCAAACAGGTTTTCTCCGCTTTGTG TGGAGGAGAGCCTCATCGCTCCCCAAAAATCCAAAATAACCTATGCCGATGTCGTCCGTG CAAAGGCATCGCCTGCCAAGGCCAAGAAGGGTG…	QNN26215.1
249	c125421_g1_i1	547	40	1.62	Sobelivirales	Solemoviridae	ssRNA(+)	Polerovirus	[Pepper vein yellows virus ]	PeVYV	Dwarfed plant	1381	638	592	3.26	69.4	1e-07	93.62	8	TCCTTTGCTGTCATCTCCAAAGGGGGTCTTTATCAGACTAAGCTTCCAATGCTTGCAACTGATGTATGCTTGGCTAGCTTGGTTGATGACATTACCAAAATAAGCCAATACCTTTGCTGTCATCTCCAAAGGCTGGCGTTATCTGCAAAACAACACAGATCAAGTGATCTTCGGAACCCACAGTTGATTGGGCCCGGCATACTTGAAAAACTGACCTTTTTCAGGTTGAACAACAGAACCAATTTTAAGAACCTTGGCTACTACATCCTTGACTGTTCCCTTGATCCTGTAGACAGCCTTAACAACTTTCTGTTTAGGCTTAGGAACAACAGTCTCCTTCTTAACGACAGGAGGACTGACAGTCTTAGATTTGACATGCCTTTTCTTAGACATGTGCTG…	JX427534.1
250	c145041_g4_i1	238	12	3.26	Sobelivirales	Solemoviridae	ssRNA(+)	Polerovirus	[Pepper yellow leaf curl Thailand virus]	PepYLCTHV	Dwarfed plant	134	1	33	24.63	51.6	2e-06	66.67	41	AATAACTCTCTCAAACTGTGGACAGAAAAAAACGCCCACTACGAGTGCATCCAACATCCG TTTTTCTTGCCTACAGCTGAAGAACCAGACGACTAATAGACGGCAGTCATCATGAACGCA AGAACAGGAGAGCAACTCACGGAAACACACCTAAACAACGGAGTTATGATTTGGACAGTC AATAATCCCCTGTATTTCAAAGTCGGCCAAATAATAGAAACGACAGGCTTCCCAGTGG	QFV20489.1
251	c137869_g4_i2	798	114	0.89	Ortervirales	Caulimoviridae	circular dsDNA,RT	Caulimovirus	[Plantago latent caulimovirus]	PlLV	Asymptomatic plant	679	320	582	38.73	252.7	2e-66	47.35	99	ATTTTTTGCCATATAAAAGAAATTTGATTAATAGATTAGTCAATAAAAAATGGTTCAGTA AATTTGATTGTAAAAGTGGTTATTGGCAAATAAAACTCACCAAAGAGTCAAAAGGATTAA CAGCCTTTAGTGTCCCAGAAGGACATTATGAATGGATAGTATTACCATTTGGATTAATGA ATGCACCACAAATATTTCAAAGAAGAATGGATAAGATATTTAGAGATATGAACGAATTCT GCATAGTATATGTTGATGATATATTAATATATAGTGATAATTTAGCAGACCATATTAAGC ATTTAGAATTATTCATTCAAACTATAAGAAAACATGGAATCCTTTTTTCTGAGAAAAAAT CAGAAATATTTAAAAATAAAATAGAATACCTAG…	AYI50292.1
252	c100452_g1_i1	242	15	3.86	Ortervirales	Caulimoviridae	circular dsDNA,RT	Caulimovirus	[Plantago latent caulimovirus]	PlLV	Dwarfed plant	703	399	478	11.38	144.1	3e-34	82.5	99	TCTAAACCTAAGAAATTAATCTTCGTCTTGAAGAGCTGAGCTTTCTTCTTAGACAAAATA ATCCCGAGGGATTGACATCTCTTCAACACTGCTGCTAAGTGCCTAAGATGATCCTGTTCA TTATCGCTGAAAATAAGAATATCATCAACGTATACACAACAGAATTTTTCAAAGGATCTA AATGCATTTTGCATATGTCTTTGAAATATGGAAGGTGCTTGTTTGAGACCAAACAGAATG AC	AYI50292.1
253	c142161_g1_i1	2155	30090	213.43	Tymovirales	Alphaflexiviridae	ssRNA(+)	Potexvirus	[Potato virus X]	PVX	Dwarfed plant	237	111	237	53.59	88.2	2e-16	33.18	29	AAACACGAACACCACCCAGGCAAGGCCAAGCCACACCAGCTGAAACCAAGCCACCAAGAA GCTGTTCCAGACCTCCAGGGCAAACCCCCTGAGTGCTTCACGCTTTCCACTCTGACTCGC ATCAAGATCCATAGGGGTCCACTGGTCCGCCATACTCGCGTTGGAATTGCTGCCATCACC GAGTTAGAGTGCTTTGCAATTGATCTCGTTTCTGATCGGCCAGTCCACTAGTTCGCTATA CTGAGCCGGCGGTTTCGACTCAATCAGAGGTCTTTCCCAAATCCCCACACCCCTTGAAAG GTAGGTTTAACACAGAAGACCAGATCCGACATGTCTGAATCTTCCGATCAAAGCGCCGGC CCGTCTAAGGCCAACCTCAATGTCACACGTGCT…	ACN22839.1
254	c134005_g1_i1	2127	13014	31.5	Tymovirales	Alphaflexiviridae	ssRNA(+)	Potexvirus	[Potato virus X]	PVX	Asymptomatic plant	237	111	237	53.59	88.2	2e-16	33.18	30	ATCTTCGCCACCAGATTTTCACTGGTCGAAGCGTTATTTAGGTGTCCTATGGACACCCTA TCAGCTATAGAGTTAAGTAACTAAAGCTCTGTGATTTGGAGAGGTTTTGGGAGCGGGAGA GTAGAGCCGCCTGCATCGATACGACCTTGAGTGACCTCGGTCGTGGCCAAGGAAACTTGG GAGGTCTTCCTATTAGCCCTCGTGATGTAGACAGACATGGCTGTCTGATGGGCTGTCTTC TCAGCTAGAGTTGGGACCCTCAGGAGTGGCACCTTGAAGGCATTTGGATTGCCAACACCA TGAAAGAAGTCAAAAGCGGCCATCCTAGTGTCGGGGAGGAAGCCCTTCTTCTCAGCCAAC GCGGAAGCTCTATTGTGGGTGATCTGGTAGTTC…	ACN22839.1
255	c133311_g1_i1	897	158	1.06	Ortervirales	Caulimoviridae	circular dsDNA,RT	Caulimovirus	[Pueraria virus A]	PVA	Asymptomatic plant	708	526	637	15.82	101.3	9e-21	41	57	CATGAGTTTGGTATTCCTTACTATAGTGTTGTTTGACTTATAATCATAGTACTTGACTAT CCTCTCATAAGCATCTGTATATGTCTTTGGGTATTTTGTTCTATCTGCCAAGGTGATAAA ATTTGGCGAATTTGGCTGGGTTGGATTGATAGTTGATATGGGATTAATAGCTGGTGTTGA AATAAGTCTTGAAACAAAGTTTTGAGAAGTATTTTGTATGGTTTTGAGTATTCTCATCTT TTCTTCAAGGGTTTTTATTAAGCTGTTAATTTCCATATTCAATGTTGAGACTTGTTCATT CTTCTCTTTAATATCTGCTAATATATCTTCCATCTGACTTTCCACCTGTTTTTCCATGCT ATTCTCTCTATCCATTTTCTCTGCTAAGAAAAT…	UME39644.1
256	c42071_g1_i1	1738	170	1.53	Reovirales	Reoviridae	linear dsRNA	Unassigned	[Raspberry latent virus]	RpLV	Dwarfed plant	1239	349	896	44.23	281.6	9e-75	30.65	99	CTATAACTAACAAAGAGAAAGAAGATCAAATCTCAAACTCGACAACAGTACTGGGAACGG ACAAACCAGCATTTGGTACAGTTAATTGGATAGAACTTCCATTGGGTGATGAATTTGACA TAAGTTACGAGCGTTTACAAGCAACACCGTTATCAAGCTCAGAATACCAGATGGAGGCCA CAAGTCAAGATCTATCAGACATAGAGGAACATCTTGGAAAAGGAGTACACTTTCTCCCTA ATACAAACACCCTACCTATTACCCATGCAACTACCGATTTAGAAACTGCTGAAAAGATTT TTAACGCCATTAAAACGAATTGTGTATGGTGCATATCTCAGAACTCAAGATATCTTGAAA AAATCTCTCAAAATTTACTCAATCTAAAGGAGG…	YP_003934921.1
257	c103856_g1_i1	829	61	1.35	Reovirales	Reoviridae	linear dsRNA	Unassigned	[Raspberry latent virus]	RpLV	Dwarfed plant	1237	57	256	16.17	54.7	2e-06	0.2762	78	CCACCTCTACCGCCGCCCAAAGTATGAACAAAGATTTATTTCTATTATCAAAATACGATGCAGCAAGAGCTCAGATTAGCAATCAAATCATGAACATTCCCAAACTTCCTGTTGTAACAATGTATGACTTTGATACTATTCAAAACTACTACGACCCTTTGACTGACTCATCTAAATCACGATACTTTCCTCAATCAAGATTCATTGGAATACATCTCGGAGACATAATTTCAGGAACACAACCAGGCAATCATAATATCATTCTCTCGCTTTCAGGTTCAGATGGAAACCTCATCTACGAGTACTTACGATCCGTGGGTTTGTCGAAAGTTTTTAGAAGTCATTACTCTTGTGAAATCAATCTTGTTAGAGAAGAAGGTGAACACCAGGTATACAATC…	YP_003934925.1
258	c93365_g2_i1	709	105	2.88	Reovirales	Reoviridae	linear dsRNA	Unassigned	[Raspberry latent virus]	RpLV	Dwarfed plant	601	1	224	37.27	128.3	5e-29	31.6	97	CAAACAATACACTCGAAAATGGATACTCTTACATTAACTCATGGAAACTTTCAAACCAAA TTTCTCAAATACTTCCTCATTCAAAATCCAAACTATTCAAAAAAGATAACACTAGATCGC GGGACGACAATCCTAGGGAAAGCAATTCAAACAGCAAGAAACGTTAGGGTCACCTCTATT ATTCACCCAGAAGTTCAGGCACTCGTTGGTCAATGGATCATAAAAATTTGGACAAGGAAC GGCAATACCTTTAAGAAGCCTCAGTCGTTAGTTGATTTCATTCAGGGCGTTGGGATCATA AACTATATTTTTCATCACGATCAAGCAGACGAATACAAATATTTTAAGCAACATTTACAA TCCAAATTCGTGAATTTTAAAATAATGGATAAG…	YP_003934925.1
259	c103856_g3_i1	625	53	1.75	Reovirales	Reoviridae	linear dsRNA	Unassigned	[Raspberry latent virus]	RpLV	Dwarfed plant	1276	1072	1258	14.66	213	2e-54	52.94	89	ATTTCTTATGATTATCCAGATATAAAAGGAAATAGGGTGTTACATAATCTTACTTTTACT GGGATAGGAGACGCTAATCCTTTAGGAATAGTAGGAAGTGATTTGAAAGCCGGCATAGGT ACATATCATTTAGTGTATGAGTTAACTGGTCTAAATTCAATAACAGGTGCGAGAGTGATG AAATTGCTACCTCATGCTGATGCAGGATATTCCGCCGATGATGTCTTCAATATATATAGA ACTATGTTAGGAAAAGCCCCTCCAGTAGATGCTTCAGCAGAAAGATGTTGGTACTCAATA GCTTTTCATTCACGAAGAAGACTCCATGCTGACAAGCCAATAGCATCTACTCCGATTAGT TTAGATAGAGAAATGAGGTTAAGGCAGATGCTT…	YP_003934917.1
260	c13546_g1_i1	616	45	1.52	Reovirales	Reoviridae	linear dsRNA	Unassigned	[Raspberry latent virus]	RpLV	Dwarfed plant	1251	443	641	15.91	112.5	3e-24	32.5	97	ACAGCTCGCATTAAGTTTAGAAGCATATGGATTCTCAAATTCGCAAATTGAAGTACATCA GCTAGTTGAAGATGAAATACGTTTAGGATTCATGCGTTCATCAAGTCAAAAACTTTCCAG CTTTCTCGTTACCGCTGCACTTACTGAATCCTTGTACGATATTATTCTTCAAAAGAACGT CGATGCTTTCACATCTTGGGGAACTATAATGCCAAACCACGTTACTCCTTCTTTTAACAA ACTCCCGACCACAAATCCCGATAGAATAGTATCTGAAATTATGAATAATGCGTATGCTCA AGTGGATTATGACGAGGCTATAATAGAGTTAGTTAAACAAGTTACCGTTCCCTTGCGATG GGCTTCTTATCCTCCAGTTCGATACCACCAAAG…	YP_003934918.1
261	c107489_g2_i1	401	45	3.16	Reovirales	Reoviridae	linear dsRNA	Unassigned	[Raspberry latent virus]	RpLV	Dwarfed plant	608	505	586	13.49	48.9	5e-05	0.2762	78	TGACAAGGACGTTGGATATAAGGCATTCGTTAACTATATAATGTCATTAGTCGATGTCCCCATTGGTTTGATCTGGGAGGCCCATTGTTCCTTCGAAGTAGCCTTTCTTCCACCGACGACCCATATGTTCACTCTCGTCCCTCCGTATGATTCTGCAACTGCTGTGCGTGCTCGCGAACGAGGTGGGGATGATGCTGACAAGAGTGCTAATAGAGCTGAAATCGTATTACACGGATTGTACTCTCGCATATGTGCAGGCAATGTTTATACAAGAATTCCAGTATCGGAGGTTTGTCATGCGTTAAGTTGGGATCCAGTGTCGTGTGGATTTGGGAGTTTAGATTAGACCCGGGATTAAGGCACCAAGGGGTGGAACCCTCTGACGTCCCGGTCTGTCAA…	YP_003934925.2
262	c24858_g1_i1	237	17	4.69	Mononegavirales	Rhabdoviridae	ssRNA (-)	Cytorhabdovirus	[Raspberry vein chlorosis virus]	RVCV	Dwarfed plant	240	6	82	32.08	82	9e-13	58.44	97	CGGGTCATCTAAATCGCCATCTATTCGATTATCTTTCATGCAGATCTTCAACTTACCTTTACCTCTAGAACCCGTTCTTGGTTTGTAGATCAGTTTGAGACGCTTGATTCGAACATTGTTCACACCGGTTAAGTGGATTCTATTGAACAAGTTTAGCGATCTTGTTAGCGATACAACACTATTGTCTACTCCGGTGATGATTTCTGACTTAATTGTATAAGAGATAGTTCCAGGAGC	QBS46640.1
263	c32783_g1_i1	225	4	1.33	Mononegavirales	Rhabdoviridae	ssRNA (-)	Cytorhabdovirus	[Raspberry vein chlorosis virus]	RVCV	Dwarfed plant	2085	1751	1825	3.6	79	1e-14	64	100	TGATGACATTATGATCTTGATTGAGTTGGACAAATCGGAGGCAGAATAGATGTAATCCTT AATAATACAAACTTCCCAACACTTAATAGACAACAATTTAATCATGGCTTCTCTTCTAGA TGACGAGTCGTCTCTCCTAAACAGCTCAATATCACTCAAGCATACGTCCAAATCTCCCAC AGAGTTGATCCACGACTCTGTCCAACGATCATCCAGAATGTCATT	QBS46644.1
264	c134381_g1_i1	4570	95274	301.87	Reovirales	Reoviridae	linear dsRNA	Fijivirus	[Rice black streaked dwarf virus]	RBSDV	Dwarfed plant	1470	65	1447	94.08	631.7	1e-179	32.15	84	GCCGACTGAAATTATTACTGAAATTATCTCTCTTAACCCTCTGCAAACGAGATTCATTTG TGATATTGAAAACAATTACACGAAATTTATATAACATATAAAAAACAAAATAACTGAAAA AAATTACAACAATAACAAAAGGAATAACATGTAACATAATTCTTGACGACCATTTGATAC TAACATTTCAATTTGTAACGTTTAGACCAATATGGCCTTTACTAATGCTGTTGATTCCGT TATCAATGCTATTCGACATAGAATGGATGATTATAAACAAAGATCGATTAAAGTTTCTGA AAATAGGAAATTAAGGTATAAAAGTGAAAATAATATACAGCATTTATTTACAAAAAAGGT TTTTGATGTTAATAAGGGAAAAATTGAATATAA…	AOS58282.1
265	c147538_g1_i1	386	18	1.36	Reovirales	Spinareoviridae	linear dsRNA	Oryzavirus	[Rice ragged stunt virus]	RRSV	Dwarfed plant	1192	931	1044	9.56	67	2e-10	33.3	88	GTTGCTTCTAACATCCAGAATTATTCAGGAAGTACAATTTTCATGTTGAAGAACGATATTTTGATTGGGAGCACGCCACCTTAAAAGAAAATCTATTTATACTTGCTAATTTCGTTATCATGGCACCTGAGAGAGGAGATGAAGCCGTTTCAAAACAACATCAGCTCAACATCATCAAAAAAGTTGCTTCTAACATCCAGAATTCCGCTTTTGAAAACGTGAACTTCGGGTTTTCATACTATTTATCCTCTTACGCTAATCTCTTTCCCAAGGACGGCGTTACTCCAGAAGGGCTTAAGTGTTGTAAAGATCCTCCCTCTATCTCTTTTGGTGATTATGAGCCTGTTGCTTGCTTGGAGCAAAATGAGATAACAGCTCTACTTGCT	QKN84384.1
266	c107489_g1_i1	322	13	1.48	Reovirales	Spinareoviridae	linear dsRNA	Oryzavirus	[Rice ragged stunt virus]	RRSV	Dwarfed plant	608	423	473	8.39	51.6	6e-06	46	46	ATCAAACGATAAGGTTTGGAAGGATAGATTCTGATGCTTATGGAAAATGGGTTACAATGCTAAAAAGTGGAAAGCCAGCTTCAGTTTATCATACTTGGGAGGATTTCGACCGTTTTCAAAATGATCCTAGCACCCCATCGTACATCGAAAACATGGTTAGTGATTATCTGATAAACGATCCTGAAGTAAGTGAGGCGGCCAATTACGCGACCACTGAATCCTTTGCCTTATCAGAATGGTTGGCCATTAACTCCCATCTCATATTAGGAAAATTTTCTTATGAGTTGCCACACTTAATGAATGACAAGGACGTTGGATATAA	AEC32887.1
267	c156238_g1_i1	317	3	0.35	Reovirales	Spinareoviridae	linear dsRNA	Oryzavirus	[Rice ragged stunt virus]	RRSV	Dwarfed plant	1192	894	993	8.39	78.2	3e-14	39	94	GGAATTCTGGATGTTAGAAGCAACTTTTTTGATGATGTTGAGCTGATGTTGTTTTGAAAC GGCTTCATCTCCTCTCTCAGGTGCCATGATAACGAAATTAGCAAGTATAAATAGATTTTC TTTTAAGGTGGCGTGCTCCCAATCAAAATATCGTTCTTCAACATGAAAATTGTACTTCCT GAATAATTCTGGACCACCACTTCTATACTCGTCGTAACACGTCACATCTTCATAATTGCG CAGAACGAACATATCCGTCAAATTCCTTGAACCTACTGAATATATGCTCTTCACTTTAAC GTTTTTCTCGCATAACC	AEC32892.1
268	c107608_g1_i1	673	222	2.21	Ortervirales	Caulimoviridae	circular dsDNA,RT	Rosadnavirus	[Rose yellow vein virus]	RYVV	Asymptomatic plant	819	339	554	26.37	270	1e-71	59.26	96	GGATATTGAAAAGAATAACACAAACTATTGCAAATCAAAGCAATTTTGTGTAATACATAT TCGGAGAATCCATTGGAGAAATACCAGGAGCAGCATCCGAAATGTAAGCTTGAGATTCTA TCGCAAGAAGAATTATCAGCAAAAAAGCTTAGTATCCCTGTTCGAAAGAAAGTGATACCA GCAACCCCAAGAGATCAGCAAGAATTCAAGATTCAGATTGAAGAATTGCTATCAATGAAG CTAATCAGAAAGAGCAGCAGCGAATGGAGCAGCCCTGCCTTTATGGTTCGCAATCATTCC GAGATCAAACGGAATAAAGCTAGGATGGTAATCAACTATACCAAGCTTAATGAAGTCATT CGCAAGAATGCATATAGGCTTCCTAATAAGGAC…	YP_007761644.1
269	c143302_g5_i1	546	64	2.6	Ortervirales	Caulimoviridae	circular dsDNA,RT	Rosadnavirus	[Rose yellow vein virus]	RYVV	Dwarfed plant	819	759	818	7.33	57	1e-07	45.9	33	ACCCTGCAAACTGATTCAAAATCAGTAGTTGGATTTTTATCTAACAAGGAGATAGACCAA AGTCATTTAGCGAAGCAGATTCGTGACAAGCTGAATATATTGGCATATCAAGATCGGATG TTTATAGAACACATAAGCGGTAAAAGAAATTTTATTGCAGATTCTTTAACCCGAGATCTT TCTTACATTGCAGGTGTACAGGAAGAAAAGGATTATGATCCAGGAGATCATAGCACTAAA GATAGCTCTAGCCAATCACAGGCAAAAGCAATCAAGGCTCAGGCCTATAAAAAGGATGAA GCTCTCTATGGAGAACTCACACCTTCAAAGCTTATAACAAGCAATATCTAGTTATATATC TTTTATAACAATCTTTGTTTGCAGAAATGGCCA…	YP_007761644.1
270	c148477_g1_i1	508	155	2.38	Ortervirales	Caulimoviridae	circular dsDNA,RT	Rosadnavirus	[Rose yellow vein virus]	RYVV	Asymptomatic plant	819	728	818	11.11	94	8e-19	50	54	CAGACTGAGCAGCACTGGGCAACATTTGACAAGGAGCTCAGAGCAATTGTGAATACGTTA AAGAGACTTAAAATCTTTTTAATGGATAAGTTCACCCTGCAAACTGATTCAAAATCAGTA GTTGGATTTTTATCTAACAAGGAGATAGACCAAAGTCATTTAGCGAAGCAGATTCGTGAC AAGCTGAATATATTGGCATATCAAGATCGGATGTTTATAGAACACATAAGCGGTAAAAGA AATTTTATTGCAGATTCTTTAACCCGAGATCTTTCTTACATTGCAGGTGTACAGGAAGAA AAGGATTATGATCCAGGAGATCATAGCACTAAAGATAGCTCTAGCCAATCACAGGCAAAA GCAATCAAGGCTCAGGCCTATAAAAAGGATGAA…	YP_007761644.1
271	c19890_g1_i1	445	50	0.97	Ortervirales	Caulimoviridae	circular dsDNA,RT	Rosadnavirus	[Rose yellow vein virus]	RYVV	Asymptomatic plant	819	671	787	14.29	112.8	1e-24	45.83	80	TTTTGATGAACTTTGATGCCCGGAGGAGATTCCATTTATAGGCTCATGGGTTTAAGTTGC TTGTAAGCGCGTCAGCTATGAAATTTCTTTTTCCACTGATGTGCTGTTCTGGCGTGATCT ATACCCTTCTTTTGGATAAAGCCAAGTACCGCACTAGAGTCTGTCTGCAAAGTAAAGTTA GCAAACAAATCTAATCGGAATCTTTTAAAGGTTAAAACAATGGCCCTTAATTCCTTGTCG AATATCGTCCACTTCTTTTCAGGTCGGGACCATAGACCACTTGTGTATTTGGCTATTTTG AATTGTTTATCAAAAACGCCTGTTGTGTTGTCCTTTGCTTGGAACTGTAAGACACCTGCC CATTGGGACTCACTAACATCTGTTGTAACATAT…	YP_007761644.1
272	c107528_g1_i1	353	12	1.1	Ortervirales	Caulimoviridae	circular dsDNA,RT	Rosadnavirus	[Rose yellow vein virus]	RYVV	Dwarfed plant	819	685	787	12.58	91.7	3e-18	43.4	90	ATGGGTTTAAGTTGCTTGTAAGCGCGTCAGCTATGAAATTTCTTTTTCCACTGATGTGCT GTTCTGGCGTGATCTATACCCTTCTTTTGGATAAAGCCAAGTACCGCACTAGAGTCTGTC TGCAAAGTAAAGTTAGCAAACAAATCTAATCGGAATCTTTTAAAGGTTAAAACAATGGCC CTTAATTCCTTGTCGAATATCGTCCACTTCTTTTCAGGTCGGGACCATAGACCACTTGTG TATTTGGCTATTTTGAATTGTTTATCAAAAACGCCTGTTGTGTTGTCCTTTGCTTGGAAC TGTAAGACACCTGCCCATTGGGACTCACTAACATCTGTTGTAACATATAATTT	YP_007761644.1
273	c56411_g1_i1	240	56	5.08	Ortervirales	Caulimoviridae	circular dsDNA,RT	Rosadnavirus	[Rose yellow vein virus]	RYVV	Asymptomatic plant	819	653	732	9.77	95.9	1e-19	56.25	98	GTTATCTTCAATTGGAGTCCTGAAGATGTCCTTATCATAAGGAAGATCAAGGAGACTTGT AGAAAGCTCCCAGCTCTTGAACTACCCACAGAAAGGGATAGACTATTTGTCACTACAGAT GCAAGTGATAAATATTGGGCAGGAGTTCTTCAATTTGAGAAGAACAACGAAGGAAACTTC GACAAGCAGCTACGTGTAGCAAGATATGTCAGTGGCAGCTGGTCACAGACTGAACAGCAC	YP_007761644.1
274	c146636_g3_i1	8315	15084	25.72	Martellivirales	Virgaviridae	ssRNA(+)	Tobamovirus	[Rubber tree latent virus 1]	RTLV1	Dwarfed plant	1616	742	1610	53.77	380.6	2e-103	0.3636	66	GGTTCAGAGTCCGAAAGCCTCATTACTAATTTTTTGCATTGGTTATTTTTACTCTTGCAAATTTTCACGCTTTAGCATTTTCACCCTGTTAAAGTTTTTACTTTTACTTTGTTGTCTACTTCCGTGGACGACTTTCACTATGGCTGTCAAGCACTGCTCAAACTGCCATAAAAATTTTTCATCCGTCAAAAGATGGAAACAGTCCTGTATTCCTGAGTTCTATACCGGTACAGGCCACTACACGTACTCTTGTTATGCGAGAGTATGCACTTCATCTCCATGTCCATCTATTGGAGAACCCATTTCGAAACCATCGACCTCTGGTCGACACACACTCTCTGATCCTGACCCCGTCTGGGGACAACTCACCGCTTCTGCGAGCGGTTCAGAGTCCGAAAG…	QXO33012.1
275	c144872_g3_i1	8256	28319	16.36	Martellivirales	Virgaviridae	ssRNA(+)	Tobamovirus	[Rubber tree latent virus 1]	RTLV1	Asymptomatic plant	1616	742	1610	53.77	380.6	2e-103	36.36	66	CTAATTTTTTGCATTGGTTATTTTTACTCTTGCAAATTTTCACGCTTTAGCATTTTCACCCTGTTAAAGTTTTTACTTTTACTTTGTTGTCTACTTCCGTGGACGACTTTCACTATGGCTGTCAAGCACTGCTCAAACTGCCATAAAAATTTTTCATCCGTCAAAAGATGGAAACAGTCCTGTATTCCTGAGTTCTATACCGGTACAGGCCACTACACGTACTCTTGTTATGCGAGAGTATGCACTTCATCTCCATGTCCATCTATTGGAGAACCCATTTCAAAACCATCGACCTCTGGTCGACACACACTCTCTGATCCTGACCCCGTCTGGGGACAACTCACCGCTTCTGCGAGCGGTTCAGAGTCCGAAAGCCTCATAAGCACTTCGGATTCCATT…	QXO33012.1
276	c146764_g1_i1	13564	10919	11.3	Mononegavirales	Rhabdoviridae	ssRNA (-)	Cytorhabdovirus	[Sambucus cytorhabdovirus]	SaV1	Dwarfed plant	2068	16	2068	99.27	1588.5	0	73.19	46	GGATGATAAAATAAAGCCAAATTAAAATCTTTTTAAATCACAGCATCAGCAGTGGAAAACGTAAGAGTTCCATATAACGGTTTTAAAGTATCAGAAACCTCATAATATCCCAACACCGGTAGCTCACAATGTCAGGGAACAATGAGACCATGAAGGCAAGACTGGCCGCTTTAAGAAGAAAATCACCACTCGACAACGACAAGAGTGTACCTGATTCATCAAAATCAGAAGTCAAAAAGACACCGAAGGCTTTCGGTGATAATGCTAGATTATTTAGTAGTGTAAAAGGTATGACAACCCCTGGAAAAACTATTCCTAAAGCTTGGAGCAATGCGGAACTTTCAAAAATCCCAATCTATGCCATTAGTCCTTTGACTCCTACTGAAGCTGTGGTTCTTG…	UQU68823.1
277	c146679_g1_i1	12145	23858	27.63	Mononegavirales	Rhabdoviridae	ssRNA (-)	Cytorhabdovirus	[Sambucus cytorhabdovirus]	SaV1	Dwarfed plant	2068	2	1989	96.13	1536.9	0	77.76	49	ATACCCAATTGTGGGACTGAGCCAGTAAATCTGCCCGGGTTCTTATATCCGCTATCATCGAGACAAACATTCCAAAGAGGATTTCTCTTAGTATCAGATAGTCAGACGTATGCATCTTCTTCTTTTGATCAACGTTCTCAAAACTCACTTTTTCTGGTCGTTTATAATGCTGTATGTTGTAAAACAATTCAGTGAAACTACCCCCAGATGGCAAGGTCCGCCCCAGACCGGGTATTGTGCTCCAATCTAGTATGATACCATACGTTGTATGGAGGCCCTGTAAATCCGTGACTCTAGAACAAATATCTTCGCAGATGGTCTGGTCAACATAGTCTTTCTCGAACATTAGAGTTTGCATCATATTGTTCCATTCATTCTTCATGGACCGTGGATCATAGC…	UQU68823.1
278	c144950_g1_i1	10116	4143	1.94	Mononegavirales	Rhabdoviridae	ssRNA (-)	Cytorhabdovirus	[Sambucus cytorhabdovirus]	SaV1	Asymptomatic plant	2068	16	1996	95.79	1538.9	0	80.04	59	ATGGAACCCATTTTGTTTTCAACTTGTTTGGCTCCCAGTCTAACACCCAATTGTGGGACTGAGCCAATAAATCTGTCCGGGTTCTTATATCCGCTATCATCGAGACAAACATTCCAAAGAGGATTTCTCTTAGTATCAGATAGTCAGACATATGCATCTTATTCTTTTGATCAACATTCTCAAAACTCACTTTTTCTGGTCGTTTGTAATGCTGTATGTTGTAAAACAATTCAGTGAAACTACCTCCAGATGGCAAGGTCCGCCCCAGACCGGGTATTGTGCTCCAATCTAGTATGATACCATACGTTGTATGAAGTCCCTGTAAATCCGTGACTCTAGAACAAATATCTTCGCATATGGTCTGGTCAACATAGTCTTTCTCAAACATGAGAGTTTGCA…	UQU68823.1
279	c143253_g2_i1	2950	2405	1.39	Mononegavirales	Rhabdoviridae	ssRNA (-)	Cytorhabdovirus	[Sambucus cytorhabdovirus]	SaV1	Asymptomatic plant	2068	2	150	7.21	77.4	2e-12	64.53	55	GTGATTTTCTGTAGCTGTTTTGAAACATATCTCATTTAATTTGACAAAATAGCCAGGAGGTTCTCTCCTAGATGAAATTGCGTTCATCGTTAGCAATATTTTGTCGGCAAATCTCATTCTGTTCCAGAGATCAGTCGGAAAATTATCTGTCAGCTTGTTCACGGCGCTGTTCATCAACGAAGAAGGCAAAGGAAAGTTTAGGTGGCTGTCTTTCCTTATCCGCACAAGAACATCAGAAATGCAATCCTCGGCTGCCTTTGTGCTATCTTCTGGTGCCTCATCTAGTATGTTCTTCAACAACACAGGATTTCCCTCCACAACCTGGTTTCTAATGCTCTTCAACTGTTCTAAAGAGTTTCTGAATCTCATAGGAGTAGTCTTCGGATCCTTGTAAAGGTT…	UQU68822.1
280	c137758_g1_i1	2632	1339	2.27	Mononegavirales	Rhabdoviridae	ssRNA (-)	Cytorhabdovirus	[Sambucus cytorhabdovirus]	SaV1	Asymptomatic plant	2068	1283	2068	38.01	351.7	4e-95	60.5	91	AGAAAACTATAAATCTTTTAACCTCTCATAATTAATTTTCCGTAGTATAGGTTAGAAATATTCCTGATCTTTGTGTGATCAAAAGATGGGATTTTTGTTTTCCCGTAAATTAGAGAAATGGTAAGTCAAAATAGATAGAGTTGTTGTCATCCTCTAGTTTTATTAAATCAAAGCAATTGATCACAGCAGACTCGAAATCACAGATAGCAGCCCATTACGCTTTTGCCTTACCGTTTCTTCCGCTTTTTGATTTTGATGAGAATGATCGGTGAGCCACCCCTGATATGGGAAAACATACAACGTCCCTCTTTTCACCCGCATGCCTGAATCTGACACTAGTTTTAAATCTTCTAAATAATAATTGATGCTTGGTCATGTACATACAGAGATACGGAACAT…	UQU68829.1
281	c144928_g1_i1	8259	1296	2.48	Mononegavirales	Rhabdoviridae	ssRNA (-)	Cytorhabdovirus	[Sambucus cytorhabdovirus]	SaV1	Asymptomatic plant	2068	16	660	31.19	602.1	5e-170	78.54	24	AAAAGACAATCAAATCAACAACTCGCAATATCAACTCACATTAAATGGAAAAAGTAAGATTCACATTAAACGTTTTCAAGTAAATTCGTTTTTTGAAATTCAAGTGTGTCATTGTGTCCTCTGTTCCAAGTTTCCCAACCAACATGTCGCTAAAAGACAAGCTGCAGGCTGCCAGAGTTGCCACAAACAATAACAACAGTGGCCCGACAAATCCCGCCGCAACACCCAACACTGACCCTTCAAAAAAGAAACAGGGAGGTAATGCAGCATTGTTTTCCCGCGTCCGTAATATGACAACACCAGGTAAGGCCATACCAAAGATCTGGTCTAACGAAGAATTGACAAGGATACCGATCTATTCACTTGAAGTGCTGACTTCTACAGAGGCTGCTCTTTTGG…	UQU68823.1
282	c144022_g1_i1	1547	3334	34.36	Mononegavirales	Rhabdoviridae	ssRNA (-)	Cytorhabdovirus	[Sambucus cytorhabdovirus]	SaV1	Dwarfed plant	459	40	453	90.2	224.9	2e-57	76.27	87	AAGACAATCAAATCAACAACTCGCAATATCAACACACATTACATGGAAAAAGTAAGATTCACATTTAACGTTTTCAAGTAAATTCGTTTTTTGAAATTCAAGTGTGTCATTGTGTCCTCTGTTCCAAGTTTCCCAACCAACATGTCGCTAAAAGATAAGCTGCAGGCTGCCAGAGTTGCCACAAACAATAACAACAGTGGCCCGACAAATCCCGCCGCAACACCCAACACAGACCTTTCAAAAAAGAAACAGGGAGGTAATGCAGCATTGTTTTCCCGCGTCCGTAATATGACAACACCAGGTAAGGCCATACCAAAGATCTGGTCTAACGAAGAATTGACAAGGATACCGATCTATTCACTTGAAGTGCTGACTTCCACAGAGGCTGCTCTTTTGGGT…	UQU68824.1
283	c128299_g1_i1	1248	323	1.44	Mononegavirales	Rhabdoviridae	ssRNA (-)	Cytorhabdovirus	[Sambucus cytorhabdovirus]	SaV1	Asymptomatic plant	2068	728	1143	20.12	398.7	1e-109	82.41	99	TCTCCTTTGTGATACTCCCTAAATAAGGGGCATTTGAGCCTAGCGAAAGATTCCAAGAGCTATTTGTTTCTTGCTTGTCTGGGAAATGCACAGAGATATAACCATCCGTGCATCCACATATGCTAGTTTCATCACATGAGGTTGGTGAAAGGTACGCCATTGGAAAAGGAGTGCTTACTCCCCTCAATATTTTTCCCCATCCTTCTCTTCTCATCTTTTGTGCCATCATGGAAGGACATTCATCTATAGATAGATCGGACCTCACACTAGATCTCCACACAAAATACCTAAAGAAGTTTACCTCATCCAATGCTACACCCTGCATAATATCTCGATTATCTGCGTCGACTGCAAGTCTTTGGATTGTGGATGCTTTTGTCACCTTACTGATGATACCAT…	UQU68829.1
284	c146696_g1_i2	902	1433	28.45	Mononegavirales	Rhabdoviridae	ssRNA (-)	Cytorhabdovirus	[Sambucus cytorhabdovirus]	SaV1	Dwarfed plant	2068	1911	2065	7.5	56.6	9e-07	69.7	62	TCCGAAGGTATTAGGGGAAAAGAAGTGTTAGTGTCACAGTTTTATTAAATCATAAGGCAACAGGATGAAGAAGGAATGAAATTCCCTGTGAAATTATAGCAGATGATCCAGATTGGTTTCCATCCCAGTGGGCTGTTGTCTTCACTACTCTACCATCATTTTATTTCCTCATGACAAACGACCGATAAGCCACACCAGTAACAGGAAAACATGCTTTATCTCTTTTCACTCCCACAGATCGAAATCTTATGCTGGCTTTATGATCTCTAAATATCATCTGTTGTTTGGCCATATACATACTCAGACAAGGGACATAGTCCGAGACATCTATTTTAGGCAGATTTCTTCTTCCATCTGACAAGTACAGATATGGAACCCATTTTGTTTCCAACTTGTTTG…	UQU68829.1
285	c142299_g2_i1	494	1074	17.27	Mononegavirales	Rhabdoviridae	ssRNA (-)	Cytorhabdovirus	[Sambucus cytorhabdovirus]	SaV1	Asymptomatic plant	2068	1982	2065	4.06	49.3	5e-05	68.69	78	AGAAGGAATGAAATTCCCTATGAAATTAGAGCAGATGACCCAGATTGGTTTCCATCATAGTGGGCTGTTGTCTTTACTACTCTATCATCGTTTTATTTCCTCATGACAAACGACCGATAAGCCACACCGGTAACAGGAAAACATGCTTTATCTCTTTTCACTCCCACAGATCGAAGTCTCATGCTGGCTTTATGATCTATAAATATCAGATGTTGTTTGGCCATATACATACTCAGACAAGGGACATAGTCCGAGACATCTATTTTAGGCAGATTTCTTCTTCCATCTGACAAGTACAGATATGGAACCCATTTTGTTTCCAACTTGTTTGGCTCCCAGTGCAACACCCAATTGTGGGACTGAACCAATAAATCTACCCGGGTTCTTGTGTCTAGAAAT…	UQU68823.1
286	c71898_g1_i1	458	33	0.61	Mononegavirales	Rhabdoviridae	ssRNA (-)	Cytorhabdovirus	[Sambucus cytorhabdovirus]	SaV1	Asymptomatic plant	2068	528	678	7.3	218.4	9e-56	84.21	99	TCCACAAATTACAATGACTGACTCTCTGCTTGATTTGACCAAGAAACTTTACACAACTGTTAAACCACAAGCAGAAAGCAAAGGACCGAGGAAGAAAAGAGCCCATTGGACGTCAAAAACAGTATGTGTGTCTCTTGATTTTGAAAAGTGGAACGGTCATATGAGACATGATAGTACATATTATGTTTTCCAGGCCTTGGGAGAACTGTTCGGGATGCCTAATTTGTATAATAGAACCTACGGTATTTTTGAGGAGAGTTATATGTATCTGGCTGACGGCTCTTATGTTCCTAAAATCGAAGGAGGTCGACTCCAGACTGATGACCCTAGAGCATTCACAGGACACAAAGGAGGCATGGAGGGGTTGAGACAAAAAGGTTGGACAATTTTCACAGTGTG…	UQU68817.1
287	c151630_g1_i1	258	34	2.43	Mononegavirales	Rhabdoviridae	ssRNA (-)	Cytorhabdovirus	[Sambucus cytorhabdovirus]	SaV1	Asymptomatic plant	2068	446	531	4.16	144.4	9e-34	91.86	100	GTTATGAATCAAGAAAAAAGACGAGGCGTTTTGCGTTGGATAAACGATCAATCTGTGAAACCAAGAGAATTTCTTCAGGATGTTAATGATGGGTTGTTTCCGGATGACCACAAAATTATAGGTTTAACTCCTAAAGAAAGAGAATTGAATCCTACGCCTCGAATGTTCGCATTGATGTCCCATCTCATGAGAATATATGTCGTAGTCACTGAACAGCTTTTATCCGATCACATACTTCAGTTCTTTCCACAAATTACA	UQU68829.1
288	c131315_g1_i1	3610	95623	130.65	Reovirales	Reoviridae	linear dsRNA	Fijivirus	[Southern rice black-streaked dwarf virus]	SRBSDV	Asymptomatic plant	1167	723	1165	37.96	67	2e-09	21.51	48	GACATAAGCACGTACAAAATACAACAGAATGAAACACCACCCCGAACTCTTGACTAACTACCTACTATATGAATTTTTGAAATTCAACAAAAATGAAATACATTTTTTAAATCAACTGATTAAACATTTACAGACTTTAGGATTTAACAACGAAACCTTTGAAAATATAGAACAATATTACGGCACTTTATTTCCACTTTTAGCTTATTCAGCTCGAGTGAATAAATCGTTGTCTAAATATTTAACAACCTCTGCACATCAATATCCAAATACTGTGATTCCTACATCAATACATCATACTTCTGAGCCAGTCGTCTCTGATTTATTACCTATAAAAAAGTTACATTATATTTCAAAAATAACTATATCTGATTTTTCCGAAATAAGATACGGTGATAG…	AFD23317.1
289	c144236_g1_i1	3586	79353	324.6	Reovirales	Reoviridae	linear dsRNA	Fijivirus	[Southern rice black-streaked dwarf virus]	SRBSDV	Dwarfed plant	1167	723	1165	37.96	62.4	2e-08	22.17	34	ACATAAGCACGTACAAAATACAACAGAATGAAACACCACCCCGAACTCTTGACTAACTAC CTACTATATGAATTTTTGAAATTCAACAAAAATGAAATACATTTTTTAAATCAACTGATT AAACATTTACAGACTTTAGGATTTAACAACGAAACCTTTGAAAATATAGAACAATATTAC GGCACTTTATTTCCACTTTTAGCTTATTCAGCTCGAGTGAATAAATCGTTGTCTAAATAT TTAACAACCTCTGCACATCAATATCCAAATACTGTGATTCCTACATCAATACATCATACT TCTGAGCCAGTCGTCTCTGATTTATTACCTATAAAAAAGTTACATTATATTTCAAAAATA ACTATATCTGATTTTTCCGAAATAAGATACGGT…	AFD23317.1
290	c131795_g1_i1	3579	84939	117.12	Reovirales	Reoviridae	linear dsRNA	Fijivirus	[Southern rice black-streaked dwarf virus]	SRBSDV	Asymptomatic plant	1146	6	1141	99.13	199.1	1e-49	23.36	73	TGACGAGTACCGATTACATGAGAACAACCATATATCAATATACAGGAAGCATTAAGGATT TACGTGAACAGCATTGTATGCCATCAGCTGAAGCAATCAAAAAGTTAAAAGAATTTCCAT TCAACATATCCTATAAACCTAAATCAAATGTCATAGAATTAACACCTACTTACGCCTGGA AACATTCTAGTATAGATTGGGAGGAATTACTTGATAGTCAAGTGACTTTTCAAATCTTTG AACGTTTAACTAAATTTAATGAAGAGTCAACATCGTTAAGTACTACTGACTATTTCACTA AAACAAATAAAATCATTGAAAGTATTATTTTACCTAAAATTGAAAATGTAGTTTCTTTAG TTGTTTCTTTCTTACCGAATATTCAAGATGATA…	AFZ65522.1
291	c107443_g1_i1	3576	64021	262.66	Reovirales	Reoviridae	linear dsRNA	Fijivirus	[Southern rice black-streaked dwarf virus]	SRBSDV	Dwarfed plant	1146	6	1141	99.13	199.1	1e-49	23.36	73	CGAGTACCGATTACATGAGAACAACCATATATCAATATACAGGAAGCATTAAGGATTTAC GTGAACAGCATTGTATGCCATCAGCTGAAGCAATCAAAAAGTTAAAAGAATTTCCATTCA ACATATCCTATAAACCTAAATCAAATGTCATAGAATTAACACCTACTTACGCCTGGAAAC ATTCTAGTATAGATTGGGAGGAATTACTTGATAGTCAAGTGACTTTTCAAATCTTTGAAC GTTTAACTAAATTTAATGAAGAGTCAACATCGTTAAGTACTACTGACTATTTCACTAAAA CAAATAAAATCATTGAAAGTATTATTTTACCTAAAATTGAAAATGTAGTTTCTTTAGTTG TTTCTTTCTTACCGAATATTCAAGATGATAATA…	AFZ65522.1
292	c145558_g1_i6	4275	1818	6.18	Ortervirales	Caulimoviridae	circular dsDNA,RT	Caulimovirus	[Soybean Putnam virus]	SPuV	Dwarfed plant	315	142	312	54.29	221.1	4e-56	62.43	16	TCCAGGATCTAATTTTTCAATTGAATACACCTCTTGAGTGTCTTCATAAGGATCTTCAAT AGGAATATATCCTAGAGAATATACTTGTTCAAGCATCTGAGATTTGCCGTCATGCTTTTT TCTGTTAGGGCACTCGTTTGCGTAGTGTCCTTCATTACAGATCCAACATCTACAATTCTT TTTGCTTTTTGGGCAAAACTTTTGTTTATCGTTAGAAAACTTCTTATGAGACTTTTTCTT AACGTATTTACCTGGTTTGAAAGGCTTTCTTTTCTTTCTAAACTGGTATTTAGTCGTATA TTTTTTATACTTCTTTTTGTAAGACTTGCTAGAAGTCTTGCATCCATACTCGCATGGTTG CTCAACAATCTTTTCACAACATTTCTTGCTAAA…	YP_006607888.1
293	c144177_g3_i2	4177	3108	3.64	Ortervirales	Caulimoviridae	circular dsDNA,RT	Caulimovirus	[Soybean Putnam virus]	SPuV	Asymptomatic plant	315	142	312	54.29	224.6	3e-57	63.01	17	GTGGTAGAGTAATATCGCTATGCAATACGAATTGCATGCAGCCTTATGAACAAACTTTGC TTGCAATACGTAAGCTTGCGCCTGTATCTACATACAAATGTAACTTTATCTGTTTATATC CTGCAAATTTCAATTTTCCATATATATAAATAGAATTTGGGTTAGTAATGTTAGACATTA CTATTTCTTCAGCTTCTTCAGTCTGCTTCTTCAGTCTGTCTCTCTGAGGAAGATGATTCA TTAGAATCTGACTCTTTTGATCCAGGATCTAATTTTTCAATTGAATACACCTCTTGAGTG TCTTCATAAGGATCTTCAATAGGAATATATCCTAGAGAATATACTTGTTCAAGCATCTGA GATTTGCCGTCATGCTTTTTTCTGTTAGGGCAC…	YP_006607888.1
294	c146191_g5_i1	3125	858	4.06	Ortervirales	Caulimoviridae	circular dsDNA,RT	Caulimovirus	[Soybean Putnam virus]	SPuV	Dwarfed plant	498	1	379	76.1	261.5	2e-68	59.55	28	ATAATAATAATAATAATAATAGTAAAATGAAAAGCATGCAAGTCTGAAAATTCGTTCAAT AAGTACAAAGAAAATAGAAAACCATTTGTGATATTAAAAAGAGAAAGAAGACGAAAAAAT TACCAATAAAAAAAAATTAAATTTTCATAATCATCGTTGTAGCCGCCGCAGTGTAATGTA CTCCAAAGCTTTTGGGTATCAATGTAGTTCTAGGCTTGGTTTTAAACAACTAAAAGCGGT GTATGATTCACTTGCTGAAACAAACCTTGACTGAGTCACTGACCTAGTAAACTATAGAAG TTCCCAAATCAATATATATATATATATATATGCCAAGTTTCTAAAGAGAACACCCTTAAA AGGAGAACAAGAGAACACTTCTCCACCACACAT…	GEX56606.1
295	c143501_g1_i1	1808	650	1.89	Ortervirales	Caulimoviridae	circular dsDNA,RT	Caulimovirus	[Soybean Putnam virus]	SPuV	Asymptomatic plant	498	37	498	92.77	325.1	8e-88	42.07	73	ACTCCAACAGAATAAGCTGAATTTATTTTGCTGATGAATACTTCCTTTCCTGAAAGGGTT AGTATAATCATTCTGGTAAATTGAGTAAAGGGTCCGTAAAGCTGCAAAAAGTTATTGCCT ATTACGAAATCAATACCTGATTCTTGCTGATAAACAGTGGGAATATGAAATATTTCTCCT GCTATCATTATGTCAAGATTTTTGCATACCTTGTTTATATCAATGATACTACCATCGGCT ATATTTACCTTGATAGTTCTTTCTGTGTTAACCCAGTGTTCTTCTGGAATAACATATTTG CTTGCGACACATATGCTTGCACCTGTATCAACATAGCAATGTAATTCAATTTGCTTATAA CCTGTAAATTTTAATTTACCTGAGATATAAATT…	YP_006607891.1
296	c135068_g1_i1	1443	243	0.91	Ortervirales	Caulimoviridae	circular dsDNA,RT	Caulimovirus	[Soybean Putnam virus]	SPuV	Asymptomatic plant	498	3	258	51.41	147.9	1e-34	37	53	TAAAATGCTATCCTATTTTGGACTCAGCAATGATCCTAGTGAAAAACTCTCCAAAAAACC CAGCATATATGGTAAGTTCGCAGCTACTTATCTTCAGAGAGGGGGAGGAATTAGTAGATT AGAAGACATGAAAAGCCTTTTAGTCGAACAAGATGCTAAAATTAAAAAATTAGCTGAGCA AGTAGATCAACTTAGTAAGTCTAAGAATGATTTACCAATAACTAGAGAAGAAGTTCTAGA AGTTTTAGGATTTACCTCTAAGTTAAACGAAATCAAGGAATACCTTAACAAGATCTTAGG ATGAGCCTTAAGGATTTTCAACAAAATTTCGATTCGATTATTAAACAACTAGATGAAATT CTTAGTTTGCTTAAAAATCAACAAAATACCGAC…	YP_006607891.1
297	c146333_g2_i1	631	106	3.44	Ortervirales	Caulimoviridae	circular dsDNA,RT	Caulimovirus	[Soybean Putnam virus]	SPuV	Dwarfed plant	699	304	511	29.76	384.8	3e-106	87.98	98	AATATACCTAAAAACCTCTGCAACTGCTTCTTGTCTTCAATCTTATCTGGAAACTTATGG ATATGTTCTAAGATATGATTTTGAGGACAATGGGTTCCCTGATCAATTTCTAAGCCTAAG AAATTAATCTTTGTCTTGAAGAGCTGTGCTTTCTTCTTGGATAAGATGATTCCAAGTAAT TGACATTTCTTCAGAACTGCTGCTAGGTGTCTAAGATGATCCTGTTCGTTATCACTAAAG ATAAGGATGTCATCTACATAAACACAACAGAAATTTTCAAAAGACCTGAATGCGTTCTGC ATATGCCTTTGAAATATGGATGGTGCTTGCTTCAATCCGAAGGGTACAACAATCCATTGA TAATGTCCTTGGGGACATGTAAATGCTGTCAAA…	YP_006607892.1
298	c109432_g2_i1	527	35	1.5	Ortervirales	Caulimoviridae	circular dsDNA,RT	Caulimovirus	[Soybean Putnam virus]	SPuV	Dwarfed plant	315	45	183	44.13	171.4	4e-42	63.57	96	CAAAATCAGGAAATCAAAACTTGATTTGAAAAAAAGAAAAAGTATTTTACATTCCAAGAA TGTTAAATCCCTTAAAAAGGAAAAACAATATCTTTTATTTTGTCTCTACAAAAAAAATGC ATGTAGACATAAAAGATACCACATGTTTAGTTTATTTACCTTTAATTACTAGAGACGAAA TAAACAAGAACTTGTTAAAAATAGACGCTAAGATCAGACCTACTATTAGTGTAGTTCACT TACGTGCTATAAAAATTCTGCTTAAAGCTGTATTTCAAGAAGGTATAGGTTCTCCTATTG AAATGGCTTTAAAAGACAATAGAATCAATAGCTGTAAAGACTGTATTTTAGGTGCTGCTA GAGGTAATTTAGCATACCAAAAATTCATGTTTA…	YP_006607888.1
299	c114197_g2_i1	487	27	1.32	Ortervirales	Caulimoviridae	circular dsDNA,RT	Caulimovirus	[Soybean Putnam virus]	SPuV	Dwarfed plant	315	79	240	51.43	239.6	1e-62	69.14	99	GTTGATATAAAAGATACTAGAGGTTATGTTTTCTTATCTCTCATTAATAGAGAAGAGATA AAAAGAAACCTGCAAAAAATTGACTCTAAGATTAGATCAACGATTAGTATGGTTCATCTA GGAGCTGTAAAAATATTGTTAAAATCTGAGTTTCAAGAAGGTATTGATTCACCTATTAAA ATGGCTTTAATAGACAATAGGATCAAAGACCGAAGAGATTGTATTTTAGGTGCAGCTAGA GGCAACTTAGATTACCAAAAATTCGTGTTCTCTGTCTACCCTAGGTTTGGACTTAGCCTA GACACAGAGAATTTAGATACGATCCTATCATTCGTACACCAGTTCGAAAGAGAAAACCTT ATGGATGCTGGAGATAAAGTCTTTAGCATATCA…	YP_006607888.1
300	c143650_g3_i3	467	33	1.74	Ortervirales	Caulimoviridae	circular dsDNA,RT	Caulimovirus	[Soybean Putnam virus]	SPuV	Dwarfed plant	315	12	66	17.46	54.7	5e-07	44.83	37	TGTTTTTTCTTTTAAAAATATCAAATTTTGGTATTTTAAAGATTGTTTCTTTCTTTAAAT CAAGTTTAGAATTTCTGATTTTCGAAAGAAGTTCGTGCTTAATTAAAAAGCTAGCTTGAA AACCTTTTTCATTTTCTAGAAATTCGATTTCCAAATTATCAGAAGATTCCTCTTCAGGGA TCTGCTCTTTTTCTTTTAAAAGGTTCATTTTAAAAGATTAAAACAAGGCTTTGATACCAA GTCGGGGGTGGTCTCCAAAGATTTTCCAGAATGATTAAATACTAGAATATTTTTGGAATT TTGCGGAAAAAGAATTAGATTTAAATCTAATTTTTTCAATTTGTTTTGAATTTTACAAAT CATTAATGAATTAATGAAATATGCAAATAAATG…	YP_006607888.1
301	c119954_g1_i1	296	47	2.24	Ortervirales	Caulimoviridae	circular dsDNA,RT	Caulimovirus	[Soybean Putnam virus]	SPuV	Asymptomatic plant	315	236	279	13.97	60.8	4e-09	59.09	44	ATGTATTCTCAGAAATAGGATCAATAGAAGAGAAGCAATTCTCAGAAATTAGTCCTTTAG AAAATTCTTGGGCAATTGATATTGCTAGGAATAAACCGCTCATGGGAGAAAGACCGAGAA TGAGCTTTAAAGGGAAACCTAGTAATAGGCGAATCCTCTGATAGAGATCTTCTTAGAAAT GTCTCTACTAGAATAGACAGCTTAAGCCAGAAGTTAGAACTTCTTGGATAAAATGTCTAA TTCCTTAACTGTAAATCCCCATATTTACAAAAAAAGAAAGATTCTCAACTTCAAGC	YP_006607888.1
302	c46898_g1_i1	255	22	1.63	Ortervirales	Caulimoviridae	circular dsDNA,RT	Caulimovirus	[Soybean Putnam virus]	SPuV	Asymptomatic plant	322	91	170	24.84	112.1	1e-24	67.5	94	AATAGACAATTACAGGAAAAGTGTACTTGCCTTTAATCACTAGAGAAGAGATTAATAGAC AATTACAGAAAATAAATTCTACGATTAGATCAACAATCGCCATGGTTCATTTAGGAGCTG TTAAGATTTTGATAAAATCAGAATTTCAAGAAGGCATTGATTCTCCCATAAAAATGGCTT TAATGGATAATAGAATCATACCAGGAAGTGACAGTATTTTAGGTGCAGCTGGAGGAAACT TAGCTTACCAAAAAT	YP_006607888.1
303	c140465_g5_i1	233	0	0	Ortervirales	Caulimoviridae	circular dsDNA,RT	Caulimovirus	[Soybean Putnam virus]	SPuV	Dwarfed plant	699	485	560	10.87	138.3	2e-32	82.89	97	TTTTGGAAAACTCTTTAGATTCTTCTTCACCTTGCTGATGTAACTGGTGTCTGAATCTTT CCATTCCCATGGAATATCCTTCTTGAGCTTAGCCTGCAAAGGTGCACGAATAGCTGCAAG TTTTGGAATATAATCAGATGCATAAGTTAATATACCTAAAAACCTTTGCAACTGTTTTTT GTCTTCAATTTTATCTGGAAACTTATGAATGTGTTCCAGGATATGGTCTTGAG	YP_006607892.1
304	c105211_g1_i1	222	2	0.7	Ortervirales	Caulimoviridae	circular dsDNA,RT	Caulimovirus	[Soybean Putnam virus]	SPuV	Dwarfed plant	534	264	335	13.48	90.5	4e-18	60.34	78	CTTCTTGAATTTCTTAACTGCTTCTTTAAATTTCTTAGGGAAGTTGTTGATTTCCAAGAG GTTATTGGACGGATAAATTGTACTTACCAATCCATTAACATAAGCTTCATAAATTAATTC CGGATTAGCATTCAGAAAGAAATTAAAGTTGCTTATATTTGCTTTGTCCGTTGTATAGAA ACGATGTTCCACGAACTCTTTCTCCGTAGCTGTTCTTCCAAG	KZM83661.1
305	c120676_g1_i1	289	50	2.55	Geplafuvirales	Geminiviridae	circular ssDNA	Begomovirus	[Squash leaf curl virus]	SLCV	Asymptomatic plant	347	277	346	20.17	107.1	5e-23	65.71	72	CTCCGTTTGTAGCTTTGCTTCCGTTATTTCTTTTCCTGTCCTGGCGTCCTTCATGGCCGG TTGCTATAAGGCGCACGTTTCTTCAGCTATAAGGACGAAAAACGGTTCTTCGATGAACTC GTAATGTGCGTTTTTATCTGTCCAGAGTTTGAGAGCGTTATTGTAAGGCTTCTCCAGGAA GTCTTTATAACTTGTTCCCTCCCCTGGGTTGCATAATATAATAGATGGAACCCCACCCTT TATGTGCACGGGCTTCGAGTATTTGCAGTTTGATTGCCAGTCGTGCTGG	AIQ86386.1
306	c143407_g2_i1	269	0	0	Geplafuvirales	Geminiviridae	circular ssDNA	Begomovirus	[Squash leaf curl virus]	SLCV	Dwarfed plant	337	269	328	17.8	84.3	3e-16	82.05	85	TATTTTAATTTGGTTTCTATTGGTTTCTAGGTTTCTTCAGCTGTAAGGACGAAAAACGGT TCTTCGATGAACTCGTAATGTGCGTTTTTATCTGTCCAGAGTTTGAGAGCGTTATTGTAA GGCTTCTCCAGGAAGTCTTTATAACTTTGCATAATATAATAGATGGAACCCCACCCTTTA TGTGCACGGGCTTCGAGTATTTGCAGTTTGATTGCCAGTCGTGCTGGGCCCCGATTAATT CCTTCCAATGCTTCATTGACAAATATTTG	AIQ86386.1
307	c144240_g1_i1	517	12	0.18	Picornavirales	Secoviridae	ssRNA(+)	Stralarivirus	[Strawberry latent ringspot virus]	SLRV	Asymptomatic plant	2227	1363	1534	7.72	344	5e-94	94.19	99	GGCTAGCTTCCAAATACTCCTCCTTGGTAATGAGGCTTCCAGATCCAGCTATTATGGTGT CCTTCTCCGTGGCCGAAAAATGGTGCACAACATGAATAGAGGCAATCTTCAGGCCTTTTC CCTTTCCATAATTTGCAACAAGAGGAGTGCCACACTGGGAAACATAGAAAAAATCATTGC GGTAGCCAGTTCCCGTGTCATCGCAGATAGTATACCTAACGCATTTATTGAGCCCGACTC CTTTCAAAAATGCTGCATCATAAACATCATTTGTGTCAAGAAGTGTATAATCAGCCTCCT CTCTTGCAACTTCCAGAACACCATTTTTTTGGAACAACATTTCCATAAACCAACCAGACC CAGCCATAAAAGGATCATGAGAAGAAAGTAACC…	YP_227372.1
308	c136700_g3_i1	478	817	13.9	Picornavirales	Secoviridae	ssRNA(+)	Stralarivirus	[Strawberry latent ringspot virus]	SLRV	Asymptomatic plant	2227	1329	1487	7.14	326.2	9e-89	93.71	99	TCATCATTATCGGGGTATTGCTCTTGGCGGAACCCGTGTCCTAATGGTTTACCATGTTTG GTTGGAGTTACATAGTGGTTGTTATAAAGTTGGTTCCTTGACCAAAACTTTTCCCTTCAC GGTTAATAGGAAACATTGCAGGTTCCAGAGATTGGGTCTTAAGGACCTGGTTATTATAGA CTTTCCACCAACTTTTGTTTCCTTCCCTGTTCTCAAATTGGAGAAGTGGTTACTTTCTTC TCATGATCCTTTTATGGCTGGGTCTGGTTGGTTTATGGAAATGTTGTTCCAAAAAAATGG TGTTCTGGAAGTTGCAAGAGAGGAGGCTGATTATACACTTCTTGACACAAATGATGTTTA TGATGCAGCATTTTTGAAAGGAGTCGGGCTCAA…	YP_227372.1
309	c124407_g1_i1	478	3774	191.14	Picornavirales	Secoviridae	ssRNA(+)	Stralarivirus	[Strawberry latent ringspot virus]	SLRV	Dwarfed plant	2227	1329	1487	7.14	326.2	9e-89	93.71	99	TCATCATTATCGGGGTATTGCTCTTGGCGGAACCCGTGTCCTAATGGTTTACCATGTTTG GTTGGAGTTACATAGTGGTTGTTATAAAGTTGGTTCCTTGACCAAAACTTTTCCCTTCAC GGTTAATAGGAAACATTGCAGGTTCCAGAGATTGGGTCTTAAGGACCTGGTTATTATAGA CTTTCCACCAACTTTTGTTTCCTTCCCTGTTCTCAAATTGGAGAAGTGGTTACTTTCTTC TCATGATCCTTTTATGGCTGGGTCTGGTTGGTTTATGGAAATGTTGTTCCAGAAAAATGG TGTTCTGGAAGTTGCAAGAGAGGAGGCTGATTATACACTTCTTGATACAAATGATGTTTA TGATGCAGCATTTTTGAAAGGAGTCGGGCTCAA…	YP_227372.1
310	c124560_g1_i1	454	6	0.33	Picornavirales	Secoviridae	ssRNA(+)	Stralarivirus	[Strawberry latent ringspot virus]	SLRV	Dwarfed plant	2227	887	1017	5.88	249.6	1e-65	82.78	99	ACCCCCTTCAACTGCTGTAACTTCAGCCAGGATCAATCTTCGATTCTCAAAGGCCTTCTT GCAGTGAACCACAGCACTTGGTGTCAAACCTGCTTGATTGGCGGTTATAAACACAAAATC AGATGTGCAACATGTGTTCCCCTTTGCTTCTAGATTTGGCATATTTAGAGGTAAGGGTGC AGATGTGCAACATGTGTTCCCCTTTGCTTCTAGATTTGGCATATTTAGAGGTAAGGGTGC AGGCGCAATCAACCTTATTATCTCAGCTTCATCAAAGTGACCACCCTCAGAGACAGCACC AAAATCATCGTACAAAACAGCACTTTGGTTCTTATAACATGACCAAAAAGAATCAGAGCC ATTCCGAGAGAAAACTCTACCAGTTTGGGCGTA…	AWO67784.1
311	c130692_g1_i1	394	680	49.44	Picornavirales	Secoviridae	ssRNA(+)	Stralarivirus	[Strawberry latent ringspot virus]	SLRV	Dwarfed plant	2227	891	1021	5.88	268.5	2e-71	98.47	99	ATCGGTGTGTTCTCAGTACCTTATAGATGATCTCCTGGATTCGCTAGATTACGCCCAAAC TGGTAGAGTTTTCTCTCGGAATGGCTCTGATTCTTTTTGGTCATGTTATAAGAACCAAAG TGCTGTTTTGTACGATGATTTTGGTGCTGTCTCTGAGGGTGGTCACTTTGATGAAGCTGA GATAATAAGGTTGATTGCGCCTGCACCCTTACCTCTAAATATGCCAAATCTAGAAGCAAA GGGGAACACATGTTGCACATCTGATTTTGTGTTTATAACCGCCAATCAAGCAGGTTTGAC ACCAAGTGCTGTGGTTCACTGCAAGAAGGCCTTTGAGAATCGAAGATTGATCCTGGCTGA AGTTACAGCTGTTGAAGGGGGTAGGTATCGTGAT	YP_227370.1
312	c137869_g3_i1	1390	345	1.35	Ortervirales	Caulimoviridae	circular dsDNA,RT	Caulimovirus	[Strawberry vein banding virus]	SVBV	Asymptomatic plant	708	246	337	12.99	100.5	2e-20	63	18	GATTATTAAGAGCCTACTTAATGAGAAAATGCGAAGAATATAGGGTACAACAAAAAATTA AGAAGGATAAAAGAAGAGGATTAAAAGAAATATGTGGTTTCACAGAAAAGAAACTATTAT TTGGATGTGATAATAAAGATAATAGGCAAAAAGGATATAAAACTTATAAAAAACCAAGTT ATAAAAAACATGATAAAAATCGTAGCATTAGCAAGCCTTATAGATCATATAGACCGTTTA GAAGAAGATTTAGAAGAAGGAGATTTCAAAAATATAAAAATACTCCAGAAAATAGAAATA TGTTTAAATTTAAAAGAAAATTTAGAAGAAGAAAATATATAAAACCTTTACAAGGAAATG ATAAAATAAAAGACTATAAATGTTGGAATTGTA…	QZN83750.1
313	c136236_g2_i1	796	67	1.57	Ortervirales	Caulimoviridae	circular dsDNA,RT	Caulimovirus	[Strawberry vein banding virus]	SVBV	Dwarfed plant	708	481	637	22.18	135.2	5e-31	41.61	81	CTAGGATATATTATAGATAGTGAAGGAATTCAGCTTCAAGATCATATTGCTAGTAAAATA AAAAATTTTAAAGAAAAATTGGAAAATAGGAAGGAAGTACAACAATTTTTAGGAATTGTA AACTATGCTTCTGATTATATTAAAGATTTACCAAAATTAAGAAAACCACTTCAAGAATTG ATTAAAAAGCATATGAAATTTGAATGGAAGGAAGAGCATACCGAAGCTATTAAATCATTA AAAGCCAGAGTAAATAAATTACCTAAACTAAGATTACCTAAAGAAGATGATCAATTAGAA TTATTTACAGATGCAAGTGATATAGGATGGGGAGCAGTCCTCATAGCTTATGAAAAAGAA GACATAGATAAAGGAAAACCTTTATTATGTGGT…	QYR69113.1
314	c122539_g1_i1	445	24	1.38	Ortervirales	Caulimoviridae	circular dsDNA,RT	Caulimovirus	[Strawberry vein banding virus]	SVBV	Dwarfed plant	708	265	411	20.76	189.9	1e-47	66.21	97	GAAAAAGTGTATGCTGAAATAAAACTAAAAGATCCCAATAAAATAATAAGAAACAGACCA ATAAGATATAGCCCAACAGATCAAAAGGAATTAGAAAATCAAATCAAAGAGTTATTAAAA TTAGGACTCATAACCGAAAGTACAAGTCCGCATAGTAGCCCAGCTTTCCTAGTAAGAAAT CATAATGAAATAAAAAGAGGAAAAGCTAGAATGGTTATAGATTATAGAGAACTAAATAAA AAGACAATATTTGATGGATATTTTTTGCCATATAAAAGAAATTTGATTAATAGATTAGTC AATAAAAAATGGTTCAGTAAATTTGATTGTAAAAGTGGTTATTGGCAAATAAAACTCACC AAAGAGTCAAAAGGATTAACAGCCTTTAGTGTC…	KAA3485339.1
315	c115010_g1_i1	998	83	1.45	Mononegavirales	Rhabdoviridae	ssRNA (-)	Cytorhabdovirus	[Strawberry virus 2]	SV2	Dwarfed plant	302	45	296	83.44	287.7	8e-77	69.57	82	ATCTTCAACGGGGAGCCCTGAGTTTATCATAAGGCAGGTTCCTCTCTTTGACAAGCAAGA TCTTGATTCGTTGAGGGCAGACTCTGAGATTAACAAGTATTTACACATCGGTTGTATAAC AGTATCCATAGAGCCCTTGATGCACCAGAAGTACATCCAGGACCACGGAGATAAGATATC CGGTCATTGTGCTATAGTTGATTCCACCTTTAGACAATTGAGGGAGTCTGTCATATCAGT TCATAGATACGAGCTCCATAAAGGTCGAGCTGATTTTGTCAGCTATCCTAATCATTGCCT GTCACTGACTGACCCTCACATTGGGCGCCGATTGTCAGTCCTGATCGGGATCAACGGCAT AGATGTTGACCCCGGTGTGGAATTGTTCAGCTT…	UJP29481.1
316	c21379_g1_i1	749	81	2.06	Mononegavirales	Rhabdoviridae	ssRNA (-)	Cytorhabdovirus	[Strawberry virus 2]	SV2	Dwarfed plant	459	6	251	53.59	183	2e-45	60.98	98	CAAGAGCGTATGAGACGGGTGTTGGAAGCTCGCCAGCAGAAATTAAAAGATGAAAAGAAT AAATCAGAAAACAAAGCAGCTCCTCTGCCTCCAAAACCTAAAGGATCAGCTGAGTTCGAC AACCTGGATACTGTCTCAGTAGGAAAGAGGAATTCAGACGTTTGGTCAGATACACACCTA GATCACATAAGCATTTATCCCGTAAAGCAGGTAAGTGCAACAGAAATTATTAGTCTAGGA GACACTATGATTAAATCAATCACCTCTGGAACTGCAAACTCAAGTACTGTTGACATATGT CTGGTTCTAGCCGTCTCGTTAGGGAAACCTGCAGAGGCCGCATTTTCACACATGCTATCT GAGCCTCCTGTCGACAAAGGGGATAAGCTTCCA…	UJP29478.1
317	c2578_g1_i1	660	73	2.22	Mononegavirales	Rhabdoviridae	ssRNA (-)	Cytorhabdovirus	[Strawberry virus 2]	SV2	Dwarfed plant	300	1	192	64	163.3	1e-39	71.19	80	TATACATGAGTTTTTGGTCTAACCTTCACTTTGTCATCAATCTTTATTACTATCTTGTTC AGTTAGTATGGAGCACGACGATAGCTCATTCGATGATTTGGACACAAGTTTGCTTCGGTC TCCTAACAGCTACCCCGGTCCTGATATTAATGGTTTATACTCTGATGACGTTGAAAGTTA TGCTCATATCCCTACTAGCTCTAATGAAGCTTCTCCTAAAGATCACAAAGAGTCTAATAC TAATCCTAAAGATGTCATGGAATTGCTTAAAGATGCTGCAGATATACAGGGGGTATCCGT GACTCCTGTGATGAGTAACACGGCAATAGCTCTAGCTAACAGATATGGACTTGAAGCATC ATCCATGGAATGGTTCATAGCTGGGATCACCTA…	UJP29479.1
318	c149190_g1_i1	583	17	0.62	Mononegavirales	Rhabdoviridae	ssRNA (-)	Cytorhabdovirus	[Strawberry virus 2]	SV2	Dwarfed plant	347	18	72	15.85	70.9	5e-09	56.82	45	GATTAATCCAGTTCTGTTATCTGAATCCTTGAAGGCTTCTGTATCTACAAAAACTCCTGAAGAGCTATTGATAAAGAAGCAGGAGGACTTATTGCTGTCTTTAGGGTTTGAATTGGAGGAGGTTCATAAGATCCCGAAGGAGTTCTTGGATGCTGTTATAGATCCCGCGTATTTGGAGGTAGATATAGATTTGATTGATAATGTTGAAGTTGCTGAGATGACTGACCTCATCCTATCATCACTGATCGAACTCGGTGTCTCTTTGTGATGCAATCACTTCCGGCCTAGTTGTGTTGATCCGCATCTCCACATTCTAGTGTAATCAAATCTATATTTATATTACTGTTATTTCTCTATTGTTCTACTGGTCCACAGTAATCTAGATTTAAGAAAACGAGT…	UJP29479.1
319	c84488_g1_i1	534	28	1.18	Mononegavirales	Rhabdoviridae	ssRNA (-)	Cytorhabdovirus	[Strawberry virus 2]	SV2	Dwarfed plant	459	262	439	38.78	221.5	3e-57	89.27	99	CTAGTTTTAGAGTCATCTTAGCCAGACGGCCTGAGATCTGGTCCACCTGGATATGGTGGG TCGCATACAATGAGAACACGAAGGCTCTCCAGGTCACTCATCAGGGATTACTTAATTATG TCGCCTGTCAGCAATTCGCTTACACAGGTATGCATGCTTACTCTCTGTTGGTAGATATTC ATGAGAAGACAGGGATGACTTTTGGAAAACTATTGAGATATCTCAATTGCCCTATCACAC GCACAGGGGTGAGGGCAGCAGCAGACATAATCAGGAATCATGAGATAACATCTAAAAATG CTGGTAGAGCCACCTATTTTCGATACTCTAGGATATGGAATCCTAAGTATTTCTCTGCTC TCCAATCAACCAACTGCCGGACATTGCTGTATG…	UJP29478.1
320	c128449_g1_i2	512	37	1.67	Mononegavirales	Rhabdoviridae	ssRNA (-)	Cytorhabdovirus	[Strawberry virus 2]	SV2	Dwarfed plant	2068	1983	2067	4.11	81.6	4e-15	69.05	49	GCTGAATGAGTCTCAATATTGGGTACTGGATTGGGAGCCTTATAGTGTATTCTGGAGACC TTATTTGAAGAGAGTAAGTACACCGAACAAACCTGTTCTTGTGTATGATTATATCCCCTT TTTGTCAAATCTGATGTTCAGGGAGAAGTTGTTATTCAAATCCTACAAACAGAAAATCTC TTTTCAACACACAGCAGATAGGAAAACCCTGTGTTTCCCCATAACGAAGACGGCCTTCAT TAAAGCAACAGTAGATAGTGTTAAGAAGTCTAAACAGAACTGGAAATCTAAAAAGAGTAC CAAAGCAAACAAGGATGAAAGATCTTAAGTATTAGGAACTCTGAACACCACTACTATACA CGGAGATCCACCTTGACTTAAGAAAACTAGGGG…	UJP29483.1
321	c160231_g1_i1	294	23	3.3	Mononegavirales	Rhabdoviridae	ssRNA (-)	Cytorhabdovirus	[Strawberry virus 2]	SV2	Dwarfed plant	548	170	266	17.7	96.7	7e-20	59.04	84	GATGAATCTTGAGTTTCCCAGCTGAACAGAAGACCTGTCGTGGACTGCCATATATGTCGA CAAGGTCCTTGAAGTCGGACAGCCCGTTTGACATCTGGGATCACGAACCTGCTCCTCCTA CAGTTGATTAAATCGATCGGATCTCCGCACCCATCACAACCATGGGATTATGATTTTGAA AAAGGGCAGGTGTCTGTAGAGGGCATAGGGTTCCATATATACCATTTCTTTCCTATTGTC CCATACCCGTCAGAAGCCGGGAAGGATGTTGTGGTCGTAGCCGGTGTGATCTTT	UJP29482.1
322	c161039_g1_i1	282	9	1.45	Mononegavirales	Rhabdoviridae	ssRNA (-)	Cytorhabdovirus	[Strawberry virus 2]	SV2	Dwarfed plant	2068	1347	1437	4.4	116.7	6e-26	75.27	98	CCGAATGTTTATCAACGGAAGAGTTCAACAGTAGATCCGAAAGAAGTAATTTAGCTTGGT TGACAGATTGTATAGCAGATAACGTAGCCTCTGACATATTCGGAAACAACCAAGAGGAAA CATTCCTGACAACATCGTTAATGGATATAAAAGAGCACAACAGATTATTCTATTTGACAA TTCCTCCTAAAGACCTTTTCCTCCAAGTGTGCAGAAGAGTCCTAACCCTGGCGGAATGGA GATGTATACACAATTCTGAATGGAAAGTGCCCACCAGAGAGT	UJP29483.1
323	c44142_g1_i1	266	10	1.91	Mononegavirales	Rhabdoviridae	ssRNA (-)	Cytorhabdovirus	[Strawberry virus 2]	SV2	Dwarfed plant	548	343	429	15.88	131.7	2e-30	78.41	99	CGGGTCATGAGATATCCCAAAATACTCTGATTCGGGCAATTCTATGTGTAAGCCATCATC GACGTGATAATGATGATTTCCCACTGCCACAACAAATTTTGTTCCTTCTATGTGATGATT ACAATCGCCCCCATCTTCTATATAACCTTTCAAAGGGTTCCACATATAGACTTCCCCATG ACAAGTTAATCCTACCCTATTCGGGTTGCCACAGAACCTGTGGGGCGTTAGTAGCTGACA GCCTACAACCGGATTGCATTTCCTTA	UJP29482.1
324	c157434_g1_i1	259	7	1.45	Mononegavirales	Rhabdoviridae	ssRNA (-)	Cytorhabdovirus	[Strawberry virus 2]	SV2	Dwarfed plant	302	1	62	20.53	87.8	3e-17	85.48	71	CTTGTCAAAGAGAGGAACCTGCCTTATGATAAACTCAGGGCTCCCCGTTGAAGTAATTAT GATATTCAGCTCTCTCTTCCGAGCGTATCGGTTATACCTTCTATCATACACAGTACCAGT CCCAACCGCAGCTGTCAGTGATCCAAGCTTCTTTAAGTCCTTCCTCACATCATTGACACT CAACATGATGGCAATATCCTGTTGTGAATGGTACAATTATCTGGTTATTCTCACTCGTTT TCTTAAATCTAGATTACTG	UJP29481.1
325	c86757_g1_i1	238	12	3.26	Mononegavirales	Rhabdoviridae	ssRNA (-)	Cytorhabdovirus	[Strawberry virus 2]	SV2	Dwarfed plant	551	126	200	13.61	87.8	3e-17	67.09	99	GTGCCCAACTCATAACTGTTCGTCTAAGCTGCCCAATCAACTTGAGCCAGAGGTCCATTA TGCATCGGAAACAACAGTTGTCAGAGATTTTGTCGTCTTGGTCTCAATGCCTAGTGGGAT AGACTTTTTGGAAAGTTCAGTAAAGATCACACCGGCTACGACCACAACATCCTTCCCGGC TTCTGACGGGTATGGGACAATAGGAAAGAAATGGTATATATGGAACCCTATGCCCTCT	UJP29482.1
326	c153729_g1_i1	226	8	2.61	Mononegavirales	Rhabdoviridae	ssRNA (-)	Cytorhabdovirus	[Strawberry virus 2]	SV2	Dwarfed plant	2068	1738	1804	3.24	55.5	1e-07	50.79	83	CTTTGATTATAACCAATCGCCATGGGGATAGTGACAGAAGTTTAGTAATGATGTTGTCCC TAATATGACTTGTATCTGCGTTACTCACCTCGACATCTGATACTAAAAATGTGACCATCC TATCTGTCATCACTTGCTCCCAGTCATCATGCCACCCAGGATGTAATATATCGTTGATTC TGTTTACCATCAGGGATGATTCAATGTGATCGTCCGTGTAATTCCG	UJP29483.1
327	c20446_g1_i1	212	17	7.05	Mononegavirales	Rhabdoviridae	ssRNA (-)	Cytorhabdovirus	[Strawberry virus 2]	SV2	Dwarfed plant	2068	1868	1936	3.34	68.9	1e-11	65.71	99	TGCCTCTCTGCAAATAGCCTAGCAGCCTAGTGTAACTCCCCATATGAGGCAAAGCACAAC CAGCAATAGGAAGTGTGGCCCAAGTTCTAATTTTTGATGTCATGAGAGCCACATTTTCCA AAGATAACACTGTCTTGTTGATTTCTTTGATTATCTGCAAACGCAGGCTGTCTGGTTCGT TGATCCCCTGGCATATAGATGCCCACATTGAT	UJP29483.1
328	c30117_g1_i1	204	1	0.48	Mononegavirales	Rhabdoviridae	ssRNA (-)	Cytorhabdovirus	[Strawberry virus 2]	SV2	Dwarfed plant	2068	917	983	3.24	104.4	2e-22	85.07	98	GCAAAACCTTTATACATGCCTCAGAGGTCCATGAAATTGCTCATTGAAGATGTCTCGAGC GTAAACTTGCTGGCCCCAGTAACTCCAACCGCAGGGTTAAGGCAAACAGTTGAAAAATAT TTGCAAGATGGGAGAACCATTCAAAATAAAGAATTCCGAGGATTGATGATGTCCCGAGAT TTGGAAGTAGAAGAAGTGTTGGCG	UJP29483.1
329	c121478_g2_i1	492	40	1.93	Ortervirales	Caulimoviridae	circular dsDNA,RT	Badnavirus	[Taro bacilliform virus]	TaBV	Dwarfed plant	1892	192	361	8.99	150.2	9e-36	57.43	86	CCCAGCTTGTCTATATAGCCCCAGAACTAATGATGAGCATAGAAGATTTCGCTAATCATA TTCAACTGGCTATCCAAACAAGAGGATACGAAGAGTGGATGGGTGAAAGAAACTTGCTAA TCACAAGATCCTTGATAGGAAGGATAACAAATGAAAGCAATGTAGGTTTCAGGTACAATG TTGCGAATGTAGTGGACTACCTTGCGAGCACAGGAATAAGAGCTGTAGCGGGAGAAAGAT ATGATACAAATACTTTACAAGGAAGGCAATGGATCCTCCAGGCACCAGTGATGCCAGACA ACAGTATTCCGCAACAGGTCCAAACAAGAACACGAGCAGACGGAACGGTATCCCTAAGAT TTGGGAACTACCAACGACGAGAGCCTCCCAGAC…	KAG6536611.1
330	c106599_g1_i1	439	7	0.41	Ortervirales	Caulimoviridae	circular dsDNA,RT	Solendovirus	[Tobacco vein clearing virus]	TVCV	Dwarfed plant	419	23	102	19.09	48.5	3e-05	36.92	69	TATGGATAAAGGAAAAGAATTGGTAGAAGATTCTAAAGAATCATATTTTCAAATGGACAC ATATGAAGAAGGAACTTCACAAACATTAAGTTTTAAACCAGAAAAGAAGAATTATTTGTT AAGAAATTATTTAAAACAAAATGGTTTAAAAGAAACAAAGAAATTAGATATATATCACAA AAACATGAAAACATAATAGATACTGCTAGTGTAAACGGGAGAGCAAAAATAATTTTAATA ACCAATGAAATAATAAAAAGAGAATTAAGAAAATTATCTACTAAAAGAAGCAAAGTAATA TAGAAACATATACTTTGGAAGGCGTAGAATTTATGATAAAAGCGTATTTTCAAAGAAATA TAGACACACCAATACAAATATATATGCTAGAGG…	NP_569140.1
331	c150678_g1_i1	203	4	0.69	Ortervirales	Caulimoviridae	circular dsDNA,RT	Solendovirus	[Tobacco vein clearing virus]	TVCV	Asymptomatic plant	419	105	170	15.75	72.4	1e-12	47	97	ATGATATACTAAAATCAGGTTGTATAGTAAATTTTAATTTTTGATATACTAAATTTCCTT TTACCACTGCTATTAATGCATCTTGTATATCTCCTAGTATCCTATCATCTATTATATATA TCTGTATAGGTGTATCAATATTTTTCTGAAAATATGCTTTTATTGTAAATTCTATTGCTC TAAGATAAATATTTTTTAATTTG	NP_569140.1
332	c145041_g3_i2	1490	363	3.91	Geplafuvirales	Geminiviridae	circular ssDNA	Unassigned	[Tomato curly top virus]	ToCTV	Dwarfed plant	371	1	315	84.91	367.1	1e-100	57.19	64	TTCCCCGCCAATCAAAAGGGGAATATTTTTGGGTTTTACCCTCCAGTGAAAATCATTAAC AAAGCAATATGAACGAACTGGATTTTCCCCAAAGGTCAAAAACTTTTGAAAAGTAGCAGA CAGGGCACTGTGGCAATTCAAATTTTTCGGGTAGCCCAATTAAAGGCCCAGAACAATAAC AAATTGATCAAAAGACCAAAACTGATAAAGCAATATGTGGGGCCCACTAGGGGACAAGAC ACTGTAGCGGACAAAAATTTCGGGGTTAAACCGGTAATATTATACGGTTTAACCCCCCCT GGGGCCGGCCAAAATTTTTTTATTAGTGAAACAGTGACCCCACTAGCGTTGAACAGGAAA CCCACTTGCAGTACAGGTGTCCAACAGAAGCTT…	BBD96258.1
333	c142883_g5_i2	659	164	1.68	Geplafuvirales	Geminiviridae	circular ssDNA	Unassigned	[Tomato curly top virus]	ToCTV	Asymptomatic plant	364	1	161	44.23	205.7	3e-52	59.26	73	ATAGTAATGATTATCCGGGTACAAGTGGGTTACAACAAAAGACTTCGCAGACAAGCTGAC TATTCATACTTTATCTATTGGCATCACTTATATAAATTCAACACCAATAACCCCAATATA GGGGGGGAGATTAATCGGTGTTACCAATTGGTGTTACCGGATATATTACAAAAATGCCAC GCCAACCAAATACCTTCAGACTTTCAGCGAAGAACCTTTTTCTTACATACTCGCGATGTT CCATTGATAAACAGACAGCAATGGAACTCATAAAATCAATTTCTTGCTCTTCAAACAAGA CTTTCATCCGCGTATCTAGAGAGTTACACGAAGATGGCCATCCTCATCTACATGTTCTAA TTCAGTTCGAAGGTAAGCTTCAACTGTATAATC…	BBD96258.1
334	c158823_g1_i1	255	11	2.39	Geplafuvirales	Geminiviridae	circular ssDNA	Begomovirus	[Tomato leaf curl Burkina Faso virus]	TolCBFV	Dwarfed plant	362	114	189	20.99	75.1	7e-13	50	89	CTGGAACAATGAACTTACTTGATGCCCACTTAGAATTATAGGCTGCTATTGGAATATCAAAAATCTTTGTTAGATTATTTGAAATGTTATGAAATTGTAAAATATAATCCCTTAGGGCATGCTCCCTTATTGTATCGAGAGCTAACTGAGCATTACCAGTATTCAGAGTTTTGGCGAAGTACTTATCTTCATTTTTTATGCAGCCCCGTGTTTTCCTTCCATCGAGTTTAAATTCCCCCAGTCTATGTAATCGCC	YP_009345717.1
335	c80150_g1_i2	243	22	5.58	Geplafuvirales	Geminiviridae	circular ssDNA	Begomovirus	[Tomato leaf curl Pakistan virus]	ToLCPaKV	Dwarfed plant	134	69	125	42.54	60.8	4e-09	54.39	70	ATAACACAGTTGTTTGTTCAACAGCAAACTCCAGAGATCTCTAAGAATACAGAAATGTTG GATAAAATTTCAAAATTTGGATGACTTTGACACCATCGTCGGAGGGTTTTAAATCTAGAT TTAAGTTTCATGTAATGGATTATCTAGATAATCTGGGTGTTATTTCAATTAACGATGTAA TTAGGGCAGTTCAATATTTTTATTGTAGATTTGGAAGACATATTGTACAAATTGAGCAAA AAG	CAQ58589.1
336	c143407_g1_i1	852	82	1.75	Geplafuvirales	Geminiviridae	circular ssDNA	Begomovirus	[Tomato yellow leaf curl Thailand virus]	TYLCTHV	Dwarfed plant	132	1	131	99.24	117.5	1e-25	48.15	46	ATACTCGAAGCCCGTGCAAATAAAGGGTGGGGTTCCATCTATTATATTATGCAACCCAGG GAGGGAACAAGTTATAAAGACTTCCTGGAGAAGCCTTACAATAACGCTCTCAAACTCTGG ACAGATAAAAACGCAAATTACGAGTTCATCGAAGAACCGTTTTTCGTCCTTACAGCTGAA GAAACGGACGCGTAATAGCAAACGGCAATGATGGACGCCAGGACAGGAAAAGAAATAACG GAAGCAAAGCTACAAAACGGAGTTATGATTTGGACCGTCAATAATCCCTTGTATTTCAAA GTGGTCAGAATTTTAGAAACGACAGGCTTCCCAGTGGCAAATGTCATAGATTTTGAAGTG TGGATAAACAGCACTTTGAGAAGGAGGCTAGAT…	UBR90614.1
337	c114656_g1_i1	243	26	2.26	Geplafuvirales	Geminiviridae	circular ssDNA	Begomovirus	[Tomato yellow leaf curl virus]	TYLCV	Asymptomatic plant	357	107	186	22.41	89	1e-17	52.5	98	AGGAACTTGACGGCCATTTAGATTTATATGCTGGTATTGGAATATCAAAAATCTTTGTTA GATTATTTGAAATGTTATGAAACTGTAAAATAAAATCCCGTGGGGCATGTTCCTTTATTG TATCGAGAGCTAATTGAACATTACCAGTATTCAAAGCCTTTGCAAAGTATTCATCTGAAT TGTTAATGGCTCCCCGTGTTTTCCGGCCATCTATTTTAAATGTCCCCCGGTCTATGAAAT CCC	AFT82984.1
338	c159321_g1_i1	202	7	1.23	Geplafuvirales	Geminiviridae	circular ssDNA	Begomovirus	[Tomato yellow leaf curl virus]	TYLCV	Asymptomatic plant	134	60	125	49.25	64.7	2e-10	51.52	98	GCTAGATCTTCACAAGTGCTTTCTAAAATTCAGAATATGGACATCGCTGACACCTTCAAC TAAAGGCTTTCTGGATAGATTAAGATTTAGTGTTTATCAATTTTTACATTCAATGCATGT AATTTCTATTAACAATGTGTTATTAGCGGTCAAGAATTTCATACGTAAATATGATCCGTA CATATTTAATGTAACCGAGCAA	AGO64008.1
339	c142838_g1_i1	3010	3086	13.69	Mononegavirales	Rhabdoviridae	ssRNA (-)	Cytorhabdovirus	[Trichosanthes associated rhabdovirus 1]	TrARV1	Dwarfed plant	452	3	452	99.56	495.7	3e-136	67.34	44	CTTCAAAGTCCTTATAATGAAACCAACAAGGATAATTCCAGGAGAATTTAATCCAATCTTTCACATCAAAAGAAATCCCGTCTATGTACTGGTCATCAGGATCTTCGAGCCTTCGGTCCACCAACTTCATCTTCATTGTGCCTGTAGCCTGCGCAGCGCATCTAGACTTAAATATGAAAGATACATTTTTGATAGCTATATTGGTGTACCCGAACTTGGTCAAAATCTTGTTAAAGAGACCAATTCTCTTAGATAGCGATATTACCCCGTCAGTTTGTCCTGTTACAAACTCCCCGGATACCACAGTCATATACGTTTCCATAATTTTCAAAAAGGATATTCTCCAGAGACCTATCTGGTGTTCTTATGGTATCTAGTTTTATTAAATCTTAAACACCT…	DAC81993.1
340	c75603_g1_i1	552	35	0.47	Mononegavirales	Rhabdoviridae	ssRNA (-)	Cytorhabdovirus	[Trichosanthes associated rhabdovirus 1]	TrARV1	Dwarfed plant	2068	1044	1227	8.9	210.7	1e-53	85.33	100	GTAAACTTCTTTAGGTATTTTGTGTGGAGATCTAGTGTGAGGTCCGATCTATCTATAGATGAATGTCCTTCCATGATGGCACAAAAGATGAGAAGAGAAGGATGGGGAAAAATATTGAGGGGAGTAAGCACTCCTTTTCCAATGGCGTACCTTTCACCAACCTCATGTGATGAAACTAGCATATGTGGATGCACGGATGGTTATATCTCTGTGCATTTCCCAGACAAGCAAGAAACAAATAGCTCTTGGAATCTTTCGCTAGGCTCAAATGCCCCTTATTTAGGGAGTATCACAAAGGAGAAAGTCATAACAGGACTCGGAAGCAAGGTATACTCTAGTGAGCCATTAGTAAGAAGGCCTCTAAACTTGCTGCGGGCAATTAACTGGTTTGTTCCTCCC…	DAC81998.1
341	c106246_g1_i1	499	23	0.36	Mononegavirales	Rhabdoviridae	ssRNA (-)	Cytorhabdovirus	[Trichosanthes associated rhabdovirus 1]	TrARV1	Dwarfed plant	2068	313	475	7.88	168.3	1e-40	81.82	99	AACCCATCATTAACATCCTGAAGAAATTCTCTTGGTTTCACAGATTGATCGTTTATCCAACGCAAAACGCCTCGTCTTTTTTCTTGATTCATAACGGTCCTCCTCATTTTTATGTTCCTCTTTAGTTCGCTTTTGGTCAAAGATATAGCTTTATCTGCGACAACCATAGACAAATTGAAAGTCTCCGGGATTTCAAAACAAGGCATAAATTGTATGTCATCCCAGTCAGACAAATCGCATAGACGACTATCTAAAGCATCGGCACTATTCTTCTCCAAAAGGCTGTGCAAGTTACTCTCCCCGGGCACAACTTTGGGATAAATGCCGTTCTTTTTCCGATACTCTCGGCAGAACATAGTTTTGAAAGATCTTCCTGCTTCCAATGCAACAACATCTGAT…	DAC81998.1
342	c106246_g2_i1	434	108	2.19	Mononegavirales	Rhabdoviridae	ssRNA (-)	Cytorhabdovirus	[Trichosanthes associated rhabdovirus 1]	TrARV1	Dwarfed plant	2068	166	285	5.8	104	2e-21	63.19	99	ATTTTTTCCAATAAAAGGATCAGTTTGTCAATGTGTATCTGGAAAGATATATTTTCTAGTATTAGATCTGATATTGTGTTTTCAAGAAATTGTGTACAAGAAACAATTTCAGATTTACAAGTGCTCTGTAGATAACCTATGCATAAAGCCTCATATGCCTTGAGCAGCTTAAATCCACCGTTACCATACTCCTCCAATATTTCATCTCCCCAGTCGATTATGGCACTTATCAGAACCCATTCAGGATAATGTAATGGATTCATCTCATGACCTACGACACTTCCCATGTACAGTAAGAATCTCTCAGAGTATAAATCACATACCATTCTTAGCCAATCCGAATCAAAACAAACAATATACGGGACATCCTCTATGGTTATAATTCTTGATTCAACCCCT…	DAC81998.1
343	c86280_g1_i1	416	96	2.11	Mononegavirales	Rhabdoviridae	ssRNA (-)	Cytorhabdovirus	[Trichosanthes associated rhabdovirus 1]	TrARV1	Asymptomatic plant	2068	1141	1265	6.04	171.8	5e-42	90.58	99	CGCCATGATAAAACCATGAGAGTAAAGAAGTATTGCACCATTCAGTCAAGCTGCATAAACAAGCTTGGAAGTGAACGTCGTAATTATCGCCACCTTTCGAATATCTAGTGAAGTTATCAGTGGATATGTGCATTCGAGTAGTGTACAAATAATTGCTAGATGCCAGTGCCCCATGTTTCAAGCTCATGTCTCTATAGCGATGAACTTCTGCTCCTGCTGTTCCTTCTGCTAACCCCTCAAACTTCCCGGTCTTCACATCTGTCACCGCATGAGTTAAACTTCTGATAACCATCGCAGTTACTGACTGGGGAGGAACAAACCAGTTAATTGCCCGCAGCAAGTTTAGAGGCCTTCTTACTAATGGCTCACTAGAGTATACCTTGCTTCCGAGTCCTGTTA…	DAC81998.1
344	c71898_g2_i1	275	36	2.11	Mononegavirales	Rhabdoviridae	ssRNA (-)	Cytorhabdovirus	[Trichosanthes associated rhabdovirus 1]	TrARV1	Asymptomatic plant	2068	478	551	3.58	127.5	8e-29	87.91	99	TTTTGACGTCCAATGGGCTCTTTTCTTCCTCGGTCCTTTGCTTTCTGCTTGTGGTTTAACAGTTGTGTAAAGTTTCTTGGTCAAATCAAGCAGAGAGTCAGTCATTGTAATTTGTGGAAAGAACTGAAGTATGTGATCGGATAAAAGCTGTTCAGTGACTACGACATATATTCTCATGAGATGGGACATCAATGCGAACATTCGAGGCGTAGGATTCAATTCTCTTTCTTTAGGAGTTAAACCTATAATTTTGTGGTCATCCGGAAACAACCCAC	DAC81998.1
345	c56411_g2_i1	322	42	1.61	Ortervirales	Caulimoviridae	circular dsDNA,RT	Rosadnavirus	[Viola yellow mottle virus]	VYMoV	Asymptomatic plant	819	552	656	12.82	117.5	4e-26	50	96	CTCAAGATCAGCACATTGAGCACCTATTCCAGGTTTCAAAGACGCTAGATCAAAGTGGTA TCATCATATCACAAAAGAAAGTCGAGCTCAACAAAACAAGGATTGATTTCCTCGGAGCTA TTATCGACAATGGCAGCATTCAGTTGCAGCCTCATGTTCTTACTAAACTGGAAGAATTTC CAGAAGAAATAAAGAACAGGCAAGCATTGCAGACATTCCTAGGAATTCTCAACTATGCAG CCAAAGATTACTGCCCAGCTTTAGCAGAAATCAAGCAGCCACTCCAAAAGAAGCTGAAGA AGAATGTTATCTTCAATTGGAG	UML14526.1
346	c145315_g1_i1	293	53	2.6	Ortervirales	Caulimoviridae	circular dsDNA,RT	Rosadnavirus	[Viola yellow mottle virus]	VYMoV	Asymptomatic plant	819	592	632	5.01	48.5	2e-05	56	41	AATTTGATGCTGCATAATTGACAACACCTAGGAAGCTTTGAAGCTCTTGCTTCTTGCTCA GAATTTCTGGATGATCCTGAAGCTTTGTTAATACATGGGGTTGAATCTTGATTCTTCCAT CCTGTTATACGATTCTGGAAAAGCAACTATGGAATTGATCAGTGCATACTGAACTATGTT TTCTTCTGGTAGAGTATTATCCATCCATTTTTGTTCTAGAATGTTAAGGATAACTATCTC CATAGCCCGTGTAAGGCACACGGGCTAGTTCTTAAGCAGTGAATAAATATAAC	UML14526.1
347	c32971_g1_i1	341	17	1.69	Ortervirales	Caulimoviridae	circular dsDNA,RT	Badnavirus	[Yacon necrotic mottle virus]	YNMoV	Dwarfed plant	2031	1491	1603	5.56	191	3e-48	78.76	99	AATGTGGGATTGCAACTTGATTTTTTGGTTTCCAATGACTGCTCCTAGGAAATCCACTTC CCGTACTGCCATCTTCATCTTTGTTGGAGACAGGATCGGGCCATTTTGCTCGCATCTTTG TAACATTATTTCCACATGTCGTGCATGTTCCTCTTCATTCCTCGAGAAAACCAGGATGTC ATCTATATAGACTGCTATGAATTCTTCTGTTCCTTTGAAGCATTCATCCATTTTTCTCTG GAATATTGCAGGCGCGTTCTTCAACCCGAATGGCATTACTAGCCATTCATACAGTCCTCC TGGGACTATAAACGCTGTCCATGGTATGCTTTCCTCGTCCA	GEY76195.1
348	c142883_g8_i1	338	61	2.08	Geplafuvirales	Geminiviridae	circular ssDNA	Begomovirus	[Yam yellow spot mosaic virus]	YNMoV	Asymptomatic plant	371	147	253	28.84	105.5	2e-22	48.65	98	GTTAGCTCTCGATACAATAAGGGAGCATGCCCCAAGGGATTATATTTTACAATTTCATAA CATTTCAAATAATCTAACAAAGATTTTTGATATTCCAATACCAGCATATAAATCTAAATG GCCGTCAAGTTCCTTTATTGTTCCACAGAGTATTCAACGATGGGTCGCACATACGTTCGT AGAACACTCAACACCCCCTGCGGGGCCCGATGCACTTATAGAAGTTGTTCTCCGCCTAAA CCGGTCGGTAGACCGGCCTACAAGTCTAATTATAGAGGGGCCTTCTAGAAGAGGCAAAAC GACATGGGCACGGTCACTTGGACGGCACAATTATATTT	AJD23411.1
349	c152164_g1_i1	492	35	1.69	Mononegavirales	Rhabdoviridae	ssRNA (-)	Cytorhabdovirus	Black currant cytorhabdovirus 1	BCRV2	Dwarfed plant	2068	1556	1716	7.79	164.5	5e-40	60	99	CCGTATCTAGCAAGGTTGATGTTATAATAACCCCATCCCACATAGATCTCAGCATCTTGC TTGTTCCCCCCAGTCCATTTCCTACTACAAAACATGCCTTTTGGTTCATCAGTTCTTGAT CTAAGTAGGAAAATATTTCCATATATTTATACATGGCATTGGTAGGTAGAGAGATCATCT TCATCACATCAATCCCTGGGATTGGCCTGATCACAATCTGTGAGTTTGCCTTACTATGAT GGAATGGGATTACTTTTGCATGGAGGCTCCTGGTATGACACAGTGTCAAACAACTCGTAA ACCGCAGAGGTTTCCATACTTTCCTCGGTAATTTTATTACTCTTTCATCAGACTCGTTTG TGCAATGCTTTCGTAGGTTGTCTAAAGTCACTC…	UZP80991.1
350	c147657_g1_i1	239	10	2.68	Mononegavirales	Rhabdoviridae	ssRNA (-)	Cytorhabdovirus	Black currant cytorhabdovirus 1	BCRV2	Dwarfed plant	177	3	74	40.68	52.8	1e-06	66.67	94	TTCCACCTATAATTATGGCTCTATCAAGTTTGGGGTGGTGCAGACTTAGTTTCAAAGACT CTTACCGGCGGTTCGATGCAGTTGACAAAACAGGGTTCTCTGAGATGTGTTCGGTTAAGT CACAAGAGTTATTTTCTTCAGGTTTACGATCTATGTTCCCTAATGATGAGGGGCTTGTCG AGATATTGTCACAGATGGAACTGAAGGGCGAGATAGTGAAGATGAGCTTAATAGCCGAC	UZP80989.1

## Sheet: Table-S2
	Table 2. Summary of raw and trimmed data status for individual library sequenced by HiSeq 4000.
	Data stats	aLibrary name	Total read bases*	Total reads	GC (%)	Q20 (%)	Q30 (%)
	Preliminary raw reads	A	66828662728	661669928	42.27	98.78	96.13
		D	66220093288	655644488	48.4	98.44	95.68
	Reads after Trimmed	A	65681645443	653637904	42.31	99.18	96.67
		D	64740782423	645507670	48.41	99.05	96.5
	aA: Asymptomatic plant sample library and D: dwarfed plant library

## Sheet: Table-S3
Table 3. Summary data of sequencing, overall mapping ratio and annotation result of each library
Sample	Assembly	Number of processed reads	Number of mapped reads & its percentage		Number of unmapped reads & its percentage		Number length of preliminary contigs(bp)	Average length of preliminary contigs(bp)
Asymptomatic	A	653637904	529312518	0.8098	124325386	0.1902	118728956	652.44
Dwarfed	D	645507670	344279682	0.5333	301227988	0.4667	135528384	666.19
aA: Asymptomatic plant sample library and D: dwarfed plant library

## Sheet: Table-S4
	Table 4. Statistical summary of trinity de novo transcriptome assembly. Raw sequence reads in each library
	Assembly	Transcript contigs
		A-library	D-library
	Total trinity transcripts	181976	203437
	Total trinity components	116426	127457
	Percent GC	38.51	38.46
	Contig N90	271	276
	Contig N50	987	1008
	Contig N10	2706	2763
	Maximum contig length	23564	26375
	Maximum contig length	201	201
	Median contig length	388	398
	Average contig length	652.44	666.19
	Total assembled bases	118728956	135528384

## Sheet: Table-S5
Table S5. The list of identified viruses of each library. Information of virus-associated contigs for viruses identified in cnidium officenale in Korea. Assembled contigs were subjected to tBLASTx against the plant viral database. Numbers indicate corresponding virus-associated contigs in each library. Virus name, abbreviated virus name, Contig length range, Percentage identity range for identifi…
						Asymptomatic library		Dwarfed library		Total
No	Genome_organization	Family	Genus	Virus name	Abbreviation	No. of contigs	% Abundance	No. of contigs	% abundance	No. of contigs 2	% abundance	Percentage identity	Contig length
1	circular dsDNA,RT	Caulimoviridae	Caulimovirus	Angelica bushy stunt virus	AnBSV	11	7.91	23	10.9	34	9.71	40-100	201-8323
2	ssRNA(+)	Bromoviridae	Cucumovirus	Cucumber mosaic virus	CMV	13	9.35	18	8.53	31	8.86	87-100	205-3380
3	ssRNA (-)	Rhabdoviridae	Unclassified rhabdovirus	Glehnia littoralis virus 1	GlLV1	14	10.07	16	7.58	30	8.57	48-98	205-2498
4	ssRNA(+)	Alphaflexivirida	Potexvirus	Cnidium virus X	CnVX	8	5.76	12	5.69	20	5.71	79-100	204-5422
5	ssRNA(+)	Secoviridae	Unassigned	Cnidium vein yellowing virus 2	CnVYV-2	9	6.47	6	2.84	15	4.29	94-100	216-2530
6	ssRNA (-)	Rhabdoviridae	Cytorhabdovirus	Strawberry virus 2	SV2			14	6.64	14	4	51-89	204-998
7	circular dsDNA,RT	Caulimoviridae	Caulimovirus	Soybean Putnam virus	SPuV	5	3.6	8	3.79	13	3.71	37-88	222-4275
8	ssRNA(+)	Betaflexiviridae	Chordovirus	Carrot Ch virus 1	CChV1			12	5.69	12	3.43	60-95	232-1879
9	circular dsDNA,RT	Caulimoviridae	Caulimovirus	Cauliflower mosaic virus	CaMV	6	4.32	6	2.84	12	3.43	35-72	206-1518
10	ssRNA (-)	Rhabdoviridae	Cytorhabdovirus	Sambucus virus 1	SaV1	8	5.76	4	1.9	12	3.43	60-92	258-13564
11	ssRNA(+)	Betaflexiviridae	Capillovirus	Apple stem grooving virus	ASGV	4	2.88	6	2.84	10	2.86	95-100	243-6507
12	ssRNA (-)	Rhabdoviridae	Betanucleorhabdovirus	Cnidium virus 1	CnV1	5	3.6	2	0.95	7	2	77-100	779-8725
13	linear dsRNA	Reoviridae	Unassigned	Raspberry latent virus	RpLV		0	6	2.84	6	1.71	27-53	401-1738
14	circular dsDNA,RT	Caulimoviridae	Badnavirus	Pelargonium vein banding virus	PVBV	2	1.44	4	1.9	6	1.71	45-85	249-1051
15	ssRNA (-)	Rhabdoviridae	Cytorhabdovirus	Trichosanthes associated rhabdovirus 1	TrARV1	2	1.44	4	1.9	6	1.71	63-91	275-3010
16	ssRNA(+)	Solemoviridae	Enamovirus	Arracacha latent virus E associated RNA	ALVE	3	2.16	3	1.42	6	1.71	49-85	1078-2923
17	circular dsDNA,RT	Caulimoviridae	Rosadnavirus	Rose yellow vein virus	RYVV	4	2.88	2	0.95	6	1.71	43-59	240-673
18	ssRNA(+)	Secoviridae	Stralarivirus	Strawberry latent ringspot virus	SLRV	2	1.44	3	1.42	5	1.43	82-98	394-517
19	circular dsDNA,RT	Caulimoviridae	Caulimovirus	Atractylodes mild mottle virus	AMMV	1	0.72	3	1.42	4	1.14	37-61	303-475
20	circular dsDNA,RT	Caulimoviridae	Badnavirus	Blackberry virus F	BVF	1	0.72	3	1.42	4	1.14	50-76	204-472
21	ssRNA(+)	Tombusviridae	Betacarmovirus	Japanese iris necrotic ring virus	JINRV	2	1.44	2	0.95	4	1.14	88-95	214-421
22	linear dsRNA	Spinareoviridae	Fijivirus	Southern rice black-streaked dwarf virus	SRBSDV	2	1.44	2	0.95	4	1.14	21-23	3576-3610
23	linear dsRNA	Reoviridae	Unassigned	Grapevine Cabernet Sauvignon reovirus	GCSV			3	1.42	3	0.86	22-36	794-1386
24	linear dsRNA	Spinareoviridae	Oryzavirus	Rice ragged stunt virus	RRSV			3	1.42	3	0.86	39-46	317-386
25	circular dsDNA,RT	Caulimoviridae	Caulimovirus	Carnation etched ring virus	CERV	1	0.72	2	0.95	3	0.86	53-80	242-645
26	circular dsDNA,RT	Caulimoviridae	Caulimovirus	Strawberry vein banding virus	SVBV	1	0.72	2	0.95	3	0.86	41-66	445-1390
27	ssRNA(+)	Solemoviridae	Polerovirus	Cnidium polerovirus 1	CnPV1	2	1.44	1	0.47	3	0.86	96-98	343-6094
28	ssRNA(+)	Secoviridae	Unassigned	Cnidium vein yellowing virus 1	CnVYV-1	2	1.44	1	0.47	3	0.86	91-100	1476-6914
29	linear dsRNA	Spinareoviridae	Fijivirus	Fiji disease virus	FDV	2	1.44	1	0.47	3	0.86	22-32	3759-4564
30	ssRNA (-)	Rhabdoviridae	Cytorhabdovirus	Black currant cytorhabdovirus 1	BCaRV			2	0.95	2	0.57	58-60	239-492
31	ssRNA (-)	Rhabdoviridae	Cytorhabdovirus	Raspberry vein chlorosis virus	RVCV			2	0.95	2	0.57	58-64	225-237
32	ssRNA (-)	Rhabdoviridae	Varicosavirus	Aponogeton virus 1	ApoV1	1	0.72	1	0.47	2	0.57	40-74	1789-1829
33	ssRNA (-)	Rhabdoviridae	Unclassified rhabdovirus	Bacopa monnieri virus 3	BmV3	1	0.72	1	0.47	2	0.57	36-40	539-610
34	ssRNA(+)	Unclassified	Satellite RNAs	Cucumber mosaic virus satellite RNA	CMVsat	1	0.72	1	0.47	2	0.57	93-97	363-711
35	circular dsDNA,RT	Caulimoviridae	Badnavirus	Gulupa bacilliform virus A	GBVA	1	0.72	1	0.47	2	0.57	68-77	264-266
36	ssRNA(+)	Betaflexiviridae	Betaflexivirus	Iris domestica betaflexivirus 1	IDBV	1	0.72	1	0.47	2	0.57	85-86	5023-5024
37	ssRNA(+)	Secoviridae	Stralarivirus	Lychnis mottle virus	LyMoV	1	0.72	1	0.47	2	0.57	96-97	3685-3710
38	linear dsRNA	Spinareoviridae	Fijivirus	Oat sterile dwarf virus	OSDV	1	0.72	1	0.47	2	0.57	22-23	1975-2018
39	circular ssDNA	Geminiviridae	Citlodavirus	Passion fruit chlorotic mottle virus	PCMoV	1	0.72	1	0.47	2	0.57	44-45	2056-2978
40	ssRNA(+)	Unclassified	Satellite RNAs	Peony yellowing associated secovirus satellite RNA	PYSV	1	0.72	1	0.47	2	0.57	67	1016-1017
41	circular dsDNA,RT	Caulimoviridae	Caulimovirus	Plantago latent caulimovirus	PlLV	1	0.72	1	0.47	2	0.57	47-82	242-798
42	ssRNA(+)	Alphaflexivirida	Potexvirus	Potato virus X	PVX	1	0.72	1	0.47	2	0.57	33	2127-2155
43	ssRNA(+)	Virgaviridae	Tobamovirus	Rubber tree latent virus 1	RTLV1	1	0.72	1	0.47	2	0.57	36	8256-8315
44	circular ssDNA	Geminiviridae	Begomovirus	Squash leaf curl virus	SLCV	1	0.72	1	0.47	2	0.57	65-82	269-289
45	circular dsDNA,RT	Caulimoviridae	Solendovirus	Tobacco vein clearing virus	TVCV	1	0.72	1	0.47	2	0.57	37-47	203-439
46	circular ssDNA	Geminiviridae	Unassigned	Tomato curly top virus	ToCTV	1	0.72	1	0.47	2	0.57	57-59	659-1490
47	circular ssDNA	Geminiviridae	Begomovirus	Tomato yellow leaf curl virus	TYLCV	2	1.44			2	0.57	51-52	202-43
48	circular dsDNA,RT	Caulimoviridae	Rosadnavirus	Viola yellow mottle virus	VYMoV	2	1.44			2	0.57	50-56	293-322
49	circular ssDNA	Geminiviridae	Begomovirus	Ageratum yellow vein virus	AYVV			1	0.47	1	0.29	54	219
50	ssRNA (-)	Rhabdoviridae	Cytorhabdovirus	Alfalfa dwarf virus	ADV			1	0.47	1	0.29	51	218
51	circular dsDNA,RT	Caulimoviridae	Vaccinivirus	Blueberry fruit drop associated virus	BFDaV			1	0.47	1	0.29	64	341
52	circular dsDNA,RT	Caulimoviridae	Badnavirus	Cacao Bacilliform SriLanka Virus	CBSLV			1	0.47	1	0.29	46	327
53	circular dsDNA,RT	Caulimoviridae	Caulimovirus	Dahlia mosaic virus	DMV			1	0.47	1	0.29	72	272
54	ssRNA(+)	Betaflexiviridae	Chordovirus	Hogweed virus 4	HV4			1	0.47	1	0.29	88	591
55	circular dsDNA,RT	Caulimoviridae	Caulimovirus	Horseradish latent virus	HRLV			1	0.47	1	0.29	42	209
56	ssRNA (-)	Rhabdoviridae	Cytorhabdovirus	Ivy vein banding virus	IVBV			1	0.47	1	0.29	90	285
57	circular dsDNA,RT	Caulimoviridae	Caulimovirus	Lamium leaf distortion virus	LLDV			1	0.47	1	0.29	50	975
58	ssRNA (-)	Rhabdoviridae	Cytorhabdovirus	Lettuce yellow mottle virus	LYMoV			1	0.47	1	0.29	60	426
59	linear dsRNA	Picobirnaviridae	Unassigned	Lysoka partiti-like virus	LPLV			1	0.47	1	0.29	54	222
60	linear dsRNA	Partitiviridae	Unassigned	Panax cryptic virus 4	PCV4			1	0.47	1	0.29	52	262
61	ssRNA(+)	Solemoviridae	Polerovirus	Pepper vein yellows virus	PeVYV			1	0.47	1	0.29	94	547
62	ssRNA(+)	Solemoviridae	Polerovirus	Pepper yellow leaf curl Thailand virus	PepYLCTHV			1	0.47	1	0.29	67	238
63	linear dsRNA	Spinareoviridae	Fijivirus	Rice black streaked dwarf virus	RBSDV			1	0.47	1	0.29	32	4570
64	circular dsDNA,RT	Caulimoviridae	Badnavirus	Taro bacilliform virus	TaBV			1	0.47	1	0.29	57	492
65	circular ssDNA	Geminiviridae	Begomovirus	Tomato leaf curl Burkina Faso virus	TolCBFV			1	0.47	1	0.29	50	255
66	circular ssDNA	Geminiviridae	Begomovirus	Tomato leaf curl Pakistan virus	ToLCPaKV			1	0.47	1	0.29	54	243
67	circular ssDNA	Geminiviridae	Begomovirus	Tomato yellow leaf curl Thailand virus	TYLCTHV			1	0.47	1	0.29	48	852
68	circular dsDNA,RT	Caulimoviridae	Badnavirus	Yacon necrotic mottle virus	YNMoV			1	0.47	1	0.29	79	341
69	circular ssDNA	Geminiviridae	Begomovirus	African cassava mosaic virus	ACMV	1	0.72			1	0.29	50	456
70	circular ssDNA	Geminiviridae	Begomovirus	Cucurbit leaf crumple virus	CuLCrV	1	0.72			1	0.29	45	209
71	ssRNA (-)	Rhabdoviridae	Unclassified rhabdovirus	Cynara cardunculus rhabdovirus	CyRV	1	0.72			1	0.29	93	248
72	circular dsDNA,RT	Caulimoviridae	Badnavirus	Dioscorea bacilliform TR virus	DVB9	1	0.72			1	0.29	81	408
73	ssRNA(+)	Bromoviridae	Cucumovirus	Hydrocharis dubia cucumovirus	HDCV	1	0.72			1	0.29	97	422
74	circular dsDNA,RT	Caulimoviridae	Badnavirus	Jujube mosaic-associated virus	JuMaV	1	0.72			1	0.29	41	569
75	circular ssDNA	Geminiviridae	Begomovirus	Merremia leaf curl virus	MerLCV	1	0.72			1	0.29	60	220
76	ssRNA(+)	Virgaviridae	Tobamovirus	Opuntia virus 2	OpV2	1	0.72			1	0.29	85	672
77	circular dsDNA,RT	Caulimoviridae	Caulimovirus	Pueraria virus A	PVA	1	0.72			1	0.29	41	897
78	circular ssDNA	Geminiviridae	Begomovirus	Yam yellow spot mosaic virus	YYSMV	1	0.72			1	0.29	49	338
					Total	139		211		350
NO.	Virus name	Asymptomatic library % abundance	Dwarfed library % abundance	Total samples % abundance
1	AnBSV	7.91	10.9	9.71
2	CMV	9.35	8.53	8.86
3	GlLV1	10.07	7.58	8.57
4	CnVX	5.76	5.69	5.71
5	CnVYV-2	6.47	2.84	4.29
6	SV2		6.64	4
7	SPuV	3.6	3.79	3.71
8	CChV1		5.69	3.43
9	CaMV	4.32	2.84	3.43
10	SaV1	5.76	1.9	3.43
11	ASGV	2.88	2.84	2.86
12	CnV1	3.6	0.95	2
13	RpLV	0	2.84	1.71
14	PVBV	1.44	1.9	1.71
15	TrARV1	1.44	1.9	1.71
16	ALVE	2.16	1.42	1.71
17	RYVV	2.88	0.95	1.71
18	SLRV	1.44	1.42	1.43
19	AMMV	0.72	1.42	1.14
20	BVF	0.72	1.42	1.14
21	JINRV	1.44	0.95	1.14
22	SRBSDV	1.44	0.95	1.14
23	GCSV		1.42	0.86
24	RRSV		1.42	0.86
25	CERV	0.72	0.95	0.86
26	SVBV	0.72	0.95	0.86
27	CnPV1	1.44	0.47	0.86
28	CnVYV-1	1.44	0.47	0.86
29	FDV	1.44	0.47	0.86
30	BCaRV		0.95	0.57
31	RVCV		0.95	0.57
32	ApoV1	0.72	0.47	0.57
33	BmV3	0.72	0.47	0.57
34	CMVsat	0.72	0.47	0.57
35	GBVA	0.72	0.47	0.57
36	IDBV	0.72	0.47	0.57
37	LyMoV	0.72	0.47	0.57
38	OSDV	0.72	0.47	0.57
39	PCMoV	0.72	0.47	0.57
40	PYSV	0.72	0.47	0.57
41	PlLV	0.72	0.47	0.57
42	PVX	0.72	0.47	0.57
43	RTLV1	0.72	0.47	0.57
44	SLCV	0.72	0.47	0.57
45	TVCV	0.72	0.47	0.57
46	ToCTV	0.72	0.47	0.57
47	TYLCV	1.44		0.57
48	VYMoV	1.44		0.57
49	AYVV		0.47	0.29
50	ADV		0.47	0.29
51	BFDaV		0.47	0.29
52	CBSLV		0.47	0.29
53	DMV		0.47	0.29
54	HV4		0.47	0.29
55	HRLV		0.47	0.29
56	IVBV		0.47	0.29
57	LLDV		0.47	0.29
58	LYMoV		0.47	0.29
59	LPLV		0.47	0.29
60	PCV4		0.47	0.29
61	PeVYV		0.47	0.29
62	PepYLCTHV		0.47	0.29
63	RBSDV		0.47	0.29
64	TaBV		0.47	0.29
65	TolCBFV		0.47	0.29
66	ToLCPaKV		0.47	0.29
67	TYLCTHV		0.47	0.29
68	YNMoV		0.47	0.29
69	ACMV	0.72		0.29
70	CuLCrV	0.72		0.29
71	CyRV	0.72		0.29
72	DVB9	0.72		0.29
73	HDCV	0.72		0.29
74	JuMaV	0.72		0.29
75	MerLCV	0.72		0.29
76	OpV2	0.72		0.29
77	PVA	0.72		0.29
78	YYSMV	0.72		0.29

## Sheet: Table-S6
	Table S6. The list of identified genera and their relative abundance of each library.
		Asymptomatic library		Dwarfed library		Total
No	Genus	No. of contigs	% abundance	No. of contigs	% abundance	Total No. Contigs	% abundance
1	Rhabdovirus	31	22.3	48	22.75	79	22.57
2	Caulimovirus	27	19.42	48	22.75	75	21.43
3	Cucumovirus	14	10.07	18	8.53	32	9.14
4	Unassigned	12	8.63	19	9	31	8.86
5	Potexvirus	9	6.47	13	6.16	22	6.29
6	Badnavirus	6	4.32	11	5.21	17	4.86
7	Chordovirus			13	6.16	13	3.71
8	Begomovirus	7	5.04	5	2.37	12	3.43
9	Capillovirus	4	2.88	6	2.84	10	2.86
10	Fijivirus	5	3.6	5	2.37	10	2.86
11	Rosadnavirus	6	4.32	2	0.95	8	2.29
12	Stralarivirus	3	2.16	4	1.9	7	2
13	Enamovirus	3	2.16	3	1.42	6	1.71
14	Polerovirus	2	1.44	3	1.42	5	1.43
15	Betacarmovirus	2	1.44	2	0.95	4	1.14
16	Satellite RNAs	2	1.44	2	0.95	4	1.14
17	Oryzavirus			3	1.42	3	0.86
18	Tobamovirus	2	1.44	1	0.47	3	0.86
19	Betaflexivirus	1	0.72	1	0.47	2	0.57
20	Citlodavirus	1	0.72	1	0.47	2	0.57
21	Solendovirus	1	0.72	1	0.47	2	0.57
22	Varicosavirus	1	0.72	1	0.47	2	0.57
23	Vaccinivirus			1	0.47	1	0.29
	Total	139		211		350
No.	Genus	Asymptomatic samples % abundance	Dwarfed samples % abundance	Total samples % abundance
1	Rhabdovirus	22.3	22.75	22.57
2	Caulimovirus	19.42	22.75	21.43
3	Cucumovirus	10.07	8.53	9.14
4	Unassigned	8.63	9	8.86
5	Potexvirus	6.47	6.16	6.29
6	Badnavirus	4.32	5.21	4.86
7	Chordovirus		6.16	3.71
8	Begomovirus	5.04	2.37	3.43
9	Capillovirus	2.88	2.84	2.86
10	Fijivirus	3.6	2.37	2.86
11	Rosadnavirus	4.32	0.95	2.29
12	Stralarivirus	2.16	1.9	2
13	Enamovirus	2.16	1.42	1.71
14	Polerovirus	1.44	1.42	1.43
15	Betacarmovirus	1.44	0.95	1.14
16	Satellite RNAs	1.44	0.95	1.14
17	Oryzavirus		1.42	0.86
18	Tobamovirus	1.44	0.47	0.86
19	Betaflexivirus	0.72	0.47	0.57
20	Citlodavirus	0.72	0.47	0.57
21	Solendovirus	0.72	0.47	0.57
22	Varicosavirus	0.72	0.47	0.57
23	Vaccinivirus		0.47	0.29

## Sheet: Table-S7
	Table S7. The list of identified families and their relative abundance of each library.
			Asymptomatic library		Dwarfed library		Total
	Genome	Family	No. of Contigs	% abundance	No. of contigs	% abundance	No. of contigs	% abundance	Category
	circular dsDNA,RT	Caulimoviridae	40	28.78	63	29.86	103	29.43	Riboviria
	ssRNA (-)	Rhabdoviridae	32	23.02	49	23.22	81	23.14	Riboviria
	ssRNA(+)	Bromoviridae	14	10.07	18	8.53	32	9.14	Riboviria
	ssRNA(+)	Betaflexiviridae	5	3.6	20	9.48	25	7.14	Riboviria
	ssRNA(+)	Secoviridae	14	10.07	11	5.21	25	7.14	Riboviria
	ssRNA(+)	Alphaflexivirida	9	6.47	13	6.16	22	6.29	Riboviria
	linear dsRNA	Reoviridae	5	3.6	13	6.16	18	5.14	Riboviria
	circular ssDNA	Geminiviridae	9	6.47	7	3.32	16	4.57	Monodnaviria
	ssRNA(+)	Solemoviridae	5	3.6	6	2.84	11	3.14	Riboviria
	linear dsRNA	Spinareoviridae			4	1.9	4	1.14	unclassified
	ssRNA(+)	Tombusviridae	2	1.44	2	0.95	4	1.14	Riboviria
	ssRNA(+)	Satellite RNAs	2	1.44	2	0.95	4	1.14	unclassified
	ssRNA(+)	Virgaviridae	2	1.44	1	0.47	3	0.86	Riboviria
	linear dsRNA	Partitiviridae			1	0.47	1	0.29	Riboviria
	linear dsRNA	Picobirnaviridae			1	0.47	1	0.29	unclassified
		Total	139		211		350
		Family	Asymptomatic library % abundance	Dwarfed library % abundance	Total % abundance
		Caulimoviridae	28.78	29.86	29.43
		Rhabdoviridae	23.02	23.22	23.14
		Bromoviridae	10.07	8.53	9.14
		Betaflexiviridae	3.6	9.48	7.14
		Secoviridae	10.07	5.21	7.14
		Alphaflexivirida	6.47	6.16	6.29
		Reoviridae	3.6	6.16	5.14
		Geminiviridae	6.47	3.32	4.57
		Solemoviridae	3.6	2.84	3.14
		Spinareoviridae		1.9	1.14
		Tombusviridae	1.44	0.95	1.14
		Satellite RNAs	1.44	0.95	1.14
		Virgaviridae	1.44	0.47	0.86
		Partitiviridae		0.47	0.29
		Picobirnaviridae		0.47	0.29
